# Supplementary material for: Probing Ferryl Reactivity in a Nonheme Iron Oxygenase Using an Expanded Genetic Code
Source: PubMed Central journal article supplement (PMC11301626; doi:10.1021/acscatal.4c02365), 2024-07-20
Supplement: cs4c02365_si_001.pdf [file cs4c02365_si_001.pdf]

## **Probing Ferryl Reactivity in a Nonheme Iron Oxygenase Using an Expanded Genetic Code**

Florence J. Hardy,<sup>1\*</sup> Matthew G. Quesne,<sup>2,3</sup> Emilie F. Gérard,<sup>1</sup> Jingming Zhao,<sup>1</sup> Mary Ortmayer,<sup>1</sup> Christopher J. Taylor,<sup>1</sup> Hafiz S. Ali,<sup>1</sup> Jeffrey W. Slater,<sup>4</sup> Colin W. Levy,<sup>1</sup> Derren J. Heyes,<sup>1</sup> J. Martin Bollinger Jr.,<sup>4</sup> Sam P. de Visser,<sup>5</sup> Anthony P. Green<sup>1\*</sup>

<sup>1</sup>Department of Chemistry & Manchester Institute of Biotechnology, The University of Manchester, 131 Princess Street, Manchester, M1 7DN, (U.K.)

<sup>2</sup>Research Complex at Harwell, Rutherford Appleton Laboratory, Harwell Oxford, Didcot, Oxon, OX11 0FA, U.K.

<sup>3</sup>Cardiff University, School of Chemistry, Main Building, Park Place, Cardiff, CF10 3AT, (U.K.)

<sup>4</sup> Department of Chemistry and Department of Biochemistry and Molecular Biology, The Pennsylvania State University, University Park, Pennsylvania 16802 (U.S.A.)

<sup>5</sup>Department of Chemical Engineering & Manchester Institute of Biotechnology, The University of Manchester, 131 Princess Street, Manchester, M1 7DN, (U.K.)

\* [florence.hardy@manchester.ac.uk](mailto:florence.hardy@manchester.ac.uk) \*[anthony.green@manchester.ac.uk](mailto:anthony.green@manchester.ac.uk)

## Methods

### *Materials*

All materials were obtained from Sigma-Aldrich unless otherwise stated. H-His(3-Me)-OH (MeHis) was purchased from Bachem. Oligonucleotides were synthesized by IDT. *Escherichia coli* (*E. coli*) 5 $\alpha$ , *E. coli* BL21 (DE3), Q5 DNA polymerase, T4 DNA ligase and restriction enzymes were purchased from New England BioLabs. Per-*d*<sub>7</sub>-L-Arginine was purchased from Cambridge Isotope Labs.

### *Construction of plasmids*

The His316MeHis mutation was introduced into a pET-28c plasmid harbouring the gene encoding VioC (pET-28c\_VioC) by replacing the His316 codon with a TAG stop codon using overlap assembly protocols (primers are given in Supplementary Table 10) and EcoRI and XhoI restriction sites to generate pET-28c\_VioC\_TAG316. A strep-II tag was introduced to replace the His<sub>6</sub>-tag using complementary primers (Supplementary Table 10) into pET-28c\_VioC and pET-28c\_VioC\_TAG316 using Gibson assembly, to give pET-28s\_VioC and pET-28s\_VioC\_TAG316. Correct DNA sequences were confirmed by DNA sequencing using T7 and T7\_term primers (Source BioScience).

### *Protein production and purification*

For expression of VioC, pET-28c/s\_VioC was transformed into *E. coli* BL21 (DE3) and the cells were plated onto an LB agar plate containing 50  $\mu\text{g ml}^{-1}$  kanamycin. A single colony of freshly transformed cells was used to inoculate 10 mL of LB medium containing 50  $\mu\text{g ml}^{-1}$  kanamycin and cultured at 37 °C with 180 rpm shaking for 18 h. 2 mL of the starter culture was used to inoculate 400 mL of bespoke medium (10 g L<sup>-1</sup> tryptone, 5 g L<sup>-1</sup> yeast extract, 2 mM MgSO<sub>4</sub>, 0.5% (w/v) glucose, 8.95 g L<sup>-1</sup> Na<sub>2</sub>HPO<sub>4</sub>, 3.4 g L<sup>-1</sup> KH<sub>2</sub>PO<sub>4</sub>, 2.67 g L<sup>-1</sup> NH<sub>4</sub>Cl, 0.71 g L<sup>-1</sup> Na<sub>2</sub>SO<sub>4</sub>) containing 50  $\mu\text{g ml}^{-1}$  kanamycin. The cultures were incubated for ~2 h at 37 °C with 180 rpm shaking until the OD<sub>600</sub> reached ~ 0.6, at which point IPTG was added to a final concentration of 200  $\mu\text{M}$ . The cultures were incubated for a further ~20 h at 22 °C and the cells were subsequently harvested by centrifugation at 4000 g for 12 min.

For expression of VioC MeHis316, pET-28\_VioC\_TAG316 were co-transformed into *E. coli* BL21 (DE3) with pEVOL\_MeHis<sup>16</sup> and the cells plated onto an LB agar plate containing 50  $\mu\text{g ml}^{-1}$  kanamycin and 34  $\mu\text{g ml}^{-1}$  chloramphenicol. A single colony of freshly transformed cells was used to inoculate 10 mL of LB medium containing 50  $\mu\text{g ml}^{-1}$  kanamycin and 34  $\mu\text{g ml}^{-1}$

chloramphenicol and cultured at 37 °C with 180 rpm shaking for 18 h. 2 mL of the starter culture was used to inoculate 400 mL of bespoke medium (as above) containing 6 mM MeHis, 50 µg ml<sup>-1</sup> kanamycin and 34 µg ml<sup>-1</sup> chloramphenicol. The cultures were incubated for ~2 h at 37 °C with 180 rpm shaking until the OD<sub>600</sub> reached ~ 0.6, at which point IPTG and L-arabinose were added to final concentrations of 200 µM and 0.05% (w/v), respectively. The cultures were incubated for a further ~20 h at 22 °C and the cells were subsequently harvested by centrifugation at 4000 g for 12 min.

For purification of strep-tagged VioC and VioC MeHis316, the pelleted bacterial cells were suspended in buffer NP (see Supplementary Table 11) supplemented with lysozyme (1 mg ml<sup>-1</sup>) and DNAase (0.01 U ml<sup>-1</sup>) and subjected to sonication (10 mins, 50% amplitude, 1 s on/off pulse). Cell lysates were centrifuged at 10 000 g for 30 min. Supernatants were subjected to a Strep-Tactin Superflow Plus resin (Qiagen) and the purified protein was eluted using buffer NPD.

For purification of VioC MeHis316 for use in crystallography, the pelleted bacterial cells were suspended in lysis buffer (50 mM HEPES, 300 mM NaCl, 20 mM imidazole, pH 7.5) supplemented with lysozyme (1 mg ml<sup>-1</sup>) and DNAase (0.01 U ml<sup>-1</sup>) and subjected to sonication (10 mins, 50% amplitude, 1 s on/off pulse). Cell lysates were centrifuged at 10 000 g for 30 min. Supernatants were subjected to a nickel resin (Qiagen) and the purified protein was eluted using an elution buffer (50 mM HEPES, 300 mM NaCl, 250 mM imidazole, pH = 7.5).

After purification, proteins were desalted using 10DG desalting columns (Bio-Rad) into 100 mM Tris pH = 7.5 and stored for a maximum of 24 h at 4 °C before experimentation/crystallisation. Protein concentrations were determined by measuring the absorbance at 280 nm and assuming an extinction coefficient of 47 440 M<sup>-1</sup> cm<sup>-1</sup> for VioC and VioC MeHis316.

### *MS analysis*

MS data for VioC and VioC MeHis were acquired on a 1200series LC (Agilent). The final protein concentrations were adjusted to 10 µM in 50 mM KPi pH 6. 5 µL of sample was injected into 1 ml min<sup>-1</sup> 5% acetonitrile (0.1% formic acid) and desalted inline. This was eluted over 1 minute by 95% acetonitrile. The resulting multiply charged spectrum was analysed by an

QTOF 6510 (Agilent) in ESI positive ion mode, and deconvoluted using Masshunter Software (Agilent). The instrument had previously been tuned and calibrated with reference solution. MS data is presented in Supplementary Table 1.

#### *Crystallization, refinement and model building*

His<sub>6</sub>-tagged VioC MeHis316 was crystallized at 10 mg ml<sup>-1</sup> in 20 mM HEPES buffer pH 7.5 containing 400 μM ammonium iron(II) sulphate hexahydrate, 2 mM L-arginine and 2 mM succinate. Crystallization conditions were identified using the JCSG-plus screen (Molecular Dimensions). Crystals suitable for diffraction experiments were obtained by sitting drop vapour diffusion in 400 nl drops containing equal volumes of protein and reservoir solution, after 72 h incubation at 4 °C. The reservoir solution comprised of 0.02 M magnesium chloride hexahydrate, 0.1 M HEPES, pH 7.5, containing 22 % (w/v) poly(acrylic acid sodium salt) 5100 as a precipitant. Prior to data collection crystals were cryoprotected with PEG 300 and plunge cooled in liquid nitrogen. All data were collected at Diamond Light Source (Harwell, UK). Data reduction was performed with Dials and the structure solved using a model derived from VioC structure 6ALQ. Iterative rounds of model building, and refinement were performed in COOT<sup>1</sup> and Phenix.refine<sup>2</sup> respectively. Validation with MOLPROBITY and PDBREDO<sup>3</sup> were incorporated into the iterative rebuild and refinement process. The resolution cut off was validated using a paired refinement in PDBREDO. Data collection and refinement statistics are shown in Supplementary Table 2.

#### *Total turnover numbers*

The total turnover numbers achieved by VioC and VioC MeHis316 were determined as follows. Reactions were performed in 1.5 mL microcentrifuge tubes (Eppendorf) containing a total volume of 100 μL in 100 mM Tris pH 7.5. A substrate mix was initiated by the addition of enzyme to give reactions with the final concentrations 1 μM enzyme, 5 mM 2-oxoglutarate (2OG), 1 mM L-arginine, 1 mM (NH<sub>4</sub>)<sub>2</sub>Fe(SO<sub>4</sub>)<sub>2</sub>(H<sub>2</sub>O)<sub>6</sub>, 1 mM sodium ascorbate. Reactions were incubated at 25 °C with shaking (300 rpm) for 18 h before quenching with 100 μL of 5 mM Fmoc *N*-hydroxysuccinimide ester in ACN. After a further 30 min shaking at 25 °C (300 rpm), the precipitated proteins were removed by centrifugation (14 000 g, 20 min) before high-pressure liquid chromatography (HPLC) analysis.

### *HPLC analysis*

HPLC analysis of Fmoc-derived L-arginine and L-arginine-OH was performed on a 1290 Infinity II Agilent LC system with a Waters Acquity UPLC HSS column (2.1 x 100 mm, 1.8  $\mu\text{m}$ ). The column was equilibrated at 67% MPA (2 mM ammonium formate in water) and 33% MPB (90:10 v/v ACN:2 mM ammonium formate in ACN) with a flow rate of 0.2 mL min<sup>-1</sup>. After injection of 2  $\mu\text{L}$  of sample, it was held at 33% MPB for 6 min, followed by a one minute wash with 90% MPB. A one minute equilibration in 33% MPB was used to prepare the column for the next injection. Detection of L-arginine-Fmoc and L-arginine-Fmoc-OH was performed using absorption at 254 nm.

### *Stopped-flow kinetics*

Stopped-flow absorbance experiments were performed inside a Belle Technology anaerobic chamber (oxygen levels < 5 ppm) using an SX20 rapid mixing stopped-flow spectrophotometer (Applied Photophysics Ltd, Leatherhead, UK) in single mixing configuration, equipped with a xenon arc lamp and a 1 cm path length in 100 mM Tris, pH 7.5 at 4 °C. Multiple wavelength data were using a photodiode array (PDA) detector and single wavelength data was obtained from a photomultiplier tube (PMT) single wavelength detector. All experiments were performed in 100 mM Tris pH 7.5 that had been degassed overnight before use. A 1 mL anaerobic substrate mix containing 18 mM 2OG, 18 mM L-arginine and 2.5 mM  $(\text{NH}_4)_2\text{Fe}(\text{SO}_4)_2(\text{H}_2\text{O})_6$  was prepared in 100 mM Tris pH 7.5, and subsequently re-adjusted to pH 7.5 using 28  $\mu\text{L}$  2M NaOH. The substrate mix was added slowly to VioC or VioC MeHis316 to give a final reaction mix containing 1 mM enzyme, 6 mM 2OG, 6 mM L-arginine, 1 mM  $(\text{NH}_4)_2\text{Fe}(\text{SO}_4)_2(\text{H}_2\text{O})_6$ . After rapid mixing of the reactant complex with air-saturated 4 °C buffer, absorbance was monitored at 320 nm for kinetic parameter determination or across 200-800 nm for spectral characterisation of the intermediates for 100 s. Kinetic parameters were determined by fitting to a double exponential model (Equation 1) using OriginLab. The kinetic parameters are given in Supplementary Table S8 and the fits for each data set are shown in Supplementary Figure S6.

#### Equation 1

$$\Delta A_{320} = A_1 e^{-k_1 t} + A_2 \frac{k_1}{k_2 - k_1} (e^{-k_1 t} - e^{-k_2 t})$$

### DFT methods

Two QM cluster models were used to study the mechanism of VioC. The models A and B are shown in Supplementary Figures S2 and S3, respectively. In both models a crystal water that hydrogen bonds to the N-H of His316 was omitted in the VioC MeHis316 system.

Model A was used to probe the electron affinity of the ferryl intermediates in VioC and VioC MeHis316. The cluster model, in addition to the ferryl intermediate, contained the side chains of the residues (Me)His316, His168, Glu170, Arg334, Ser158, Asp286, Thr169, Val315, Asn311, Ile309, Gly166, succinate and arginine for a total of 240 atoms.

Model B was used to study the catalytic cycle of VioC and VioC MeHis316 and determine the energy landscapes for C3-hydroxylation of L-Arg. This larger cluster model includes additional residues in proximity to the substrate L-Arginine *c.f.* that shown in Supplementary Figure S2, giving a total of 353 atoms in this larger QM cluster. This model contains the ferryl intermediate bound to succinate, which was positioned *cis* to the peptide chain His168–Thr169–Glu170 and *trans* to the peptide chain His316–Val315–Ala314. In addition, several small peptide chains were included that position the substrate, namely, Thr155–Leu156–Val157–Ser158, Asp222–Asp223–Ser224, Asp268–Gly269–Asp270–Phe271, and Ile309–Asp310–Asn311. Arg334 side chain, Leu196 and two crystal water molecules were also included.

DFT calculations were conducted using Gaussian16 at the unrestricted B3LYP level of theory. Geometry optimizations and frequency calculations used the LANL2DZ basis set (with electron core potential) on the iron and 6-31G\* on all other atoms. Local minima were characterized by a frequency calculation that confirmed them with real frequencies only. Free energies (G) were calculated at 298 K and 1 bar and include relative enthalpies with zero-point (ZPE), thermal and entropic corrections.

To improve the accuracy of the energetics, we ran single-point energy calculations using LACV3P+ on iron (with core potential) and 6-311+G\* for the rest of the atoms (basis set BS2). These calculations also include dispersion contributions using the (GD3 method)<sup>4</sup> and solvent effects through the self-consistent reaction field approach. Chlorobenzene was selected as the solvent of choice and the conductor-like polarizable continuum model (CPCM) was used to apply a consistent perturbation to the SCF.<sup>5</sup> Free energies use thermal corrections and

entropies calculated at 298 K using the analytical frequency functionality as implemented in Gaussian09.<sup>6</sup>

## DNA sequences

### *His<sub>6</sub>-VioC*

ATGGGCAGCAGCCATCATCATCATCACAGCAGCGGCCTGGTGCCGCGCGGCAGCCATATGGCT  
AGCATGACTGGTGGACAGCAAATGGGTCGCGGATCCGAATTCATGACCGAAAGCCCGACCACCCAT  
CATGGTGCAGCACCGCCTGATAGCGTTGCAACACCGGTTTCGTCCGTGGTCAGAATTTTCGTCTGACAC  
CGGCAGAAGCAGCAGCAGCCGCAGCACTGGCAGCACGTTGTGCACAGCGTTATGATGAAACCGAT  
GGTCCGGAATTTCTGCTGGATGCACCGGTTATTGCACATGAACTGCCTCGTCTGCGTACCTTTAT  
GGCACGTGCGCGTCTGGATGCATGGCCTCATGCACTGGTTGTTTCGTGGTAATCCGGTTGATGATGCA  
GCCCTGGGTAGCACTCCGGTTCATTGGCGTACCGCACGTACACCGGGTAGCCGTCCGCTGAGCTTCC  
TGCTGATGCTGTATGCAGGTCTGCTGGGTGATGTTTTTGGTTGGGCAACCCAGCAGGATGGTCGTGT  
TGTTACCGATGTTCTGCCGATTAAGGTGGTGAACATACCCTGGTTAGCAGCAGCTCACGTCAAGAA  
CTGGGTTGGCATAACCGAAGATGCATTTAGCCCGTATCGTGCAGATTATGTTGGTCTGCTGAGCCTGC  
GTAATCCGGATGGTGTGCCACCACCTGGCAGGCGTTCCGCTGGATGATCTGGATGAACGCACCCT  
GGATGTTCTGTTTCAAGAACGTTTTCTGATTCGTCCGGATGATAGCCATCTGCAGGTTAATAACAGCA  
CCGCACAGCAGGGTCGTGTGGAATTTGAAGGTATTGCACAGGCAGCAGATCGTCCGGAACCGGTTG  
CCATTCTGACAGGTCATCGTGCCGCACCGCATCTGCGTGTTGATGGTGAATTTTTAGCCCCCTGCCGAA  
GGTATGAAGAAGCCGCAGCGGCACTGGGCACCCTGCGTAAACTGATTGATGCAAGCCTGTATGAA  
CTGTTCTGGATCAGGGTGTGTGGCCTTTATTGATAATCGTCTGCGCGTT**CAT**GGTCTGCTGCATT  
TCAGCCTCGCTATGATGGTCGCGATCGTTGGCTGAAACGTATTAACATTACCCGTGATCTGCATCGTA  
GCCGTAAAGCATGGGCAGGCGATAGCCGTGTTCTGGGTTCAGCGTTAA

### *His<sub>6</sub>-VioC MeHis*

ATGGGCAGCAGCCATCATCATCATCACAGCAGCGGCCTGGTGCCGCGCGGCAGCCATATGGCT  
AGCATGACTGGTGGACAGCAAATGGGTCGCGGATCCGAATTCATGACCGAAAGCCCGACCACCCAT  
CATGGTGCAGCACCGCCTGATAGCGTTGCAACACCGGTTTCGTCCGTGGTCAGAATTTTCGTCTGACAC  
CGGCAGAAGCAGCAGCAGCCGCAGCACTGGCAGCACGTTGTGCACAGCGTTATGATGAAACCGAT  
GGTCCGGAATTTCTGCTGGATGCACCGGTTATTGCACATGAACTGCCTCGTCTGCGTACCTTTAT  
GGCACGTGCGCGTCTGGATGCATGGCCTCATGCACTGGTTGTTTCGTGGTAATCCGGTTGATGATGCA  
GCCCTGGGTAGCACTCCGGTTCATTGGCGTACCGCACGTACACCGGGTAGCCGTCCGCTGAGCTTCC  
TGCTGATGCTGTATGCAGGTCTGCTGGGTGATGTTTTTGGTTGGGCAACCCAGCAGGATGGTCGTGT  
TGTTACCGATGTTCTGCCGATTAAGGTGGTGAACATACCCTGGTTAGCAGCAGCTCACGTCAAGAA  
CTGGGTTGGCATAACCGAAGATGCATTTAGCCCGTATCGTGCAGATTATGTTGGTCTGCTGAGCCTGC  
GTAATCCGGATGGTGTGCCACCACCTGGCAGGCGTTCCGCTGGATGATCTGGATGAACGCACCCT  
GGATGTTCTGTTTCAAGAACGTTTTCTGATTCGTCCGGATGATAGCCATCTGCAGGTTAATAACAGCA  
CCGCACAGCAGGGTCGTGTGGAATTTGAAGGTATTGCACAGGCAGCAGATCGTCCGGAACCGGTTG  
CCATTCTGACAGGTCATCGTGCCGCACCGCATCTGCGTGTTGATGGTGAATTTTTAGCCCCCTGCCGAA  
GGTATGAAGAAGCCGCAGCGGCACTGGGCACCCTGCGTAAACTGATTGATGCAAGCCTGTATGAA  
CTGTTCTGGATCAGGGTGTGTGGCCTTTATTGATAATCGTCTGCGCGTT**TAG**GGTCTGCTGCATT  
TTCAGCCTCGCTATGATGGTCGCGATCGTTGGCTGAAACGTATTAACATTACCCGTGATCTGCATCGT  
AGCCGTAAAGCATGGGCAGGCGATAGCCGTGTTCTGGGTTCAGCGTTAA

### *StreptII-VioC*

ATGGGCAGCAGCTGGAGTCACCCACAGTTTGAGAAAGGCAGCCATATGGCTAGCATGACTGGTGGGA  
CAGCAAATGGGTCGCGGATCCGAATTCATGACCGAAAGCCCGACCACCCATCATGGTGCAGCACCG  
CCTGATAGCGTTGCAACACCGGTTTCGTCCGTGGTCAGAATTTTCGTCTGACACCGGCAGAAGCAGCA



GCAGCCGCAGCACTGGCAGCACGTTGTGCACAGCGTTATGATGAAACCGATGGTCCGGAATTTCTG  
CTGGATGCACCGGTTATTGCACATGAACTGCCTCGTCGTCTGCGTACCTTTATGGCACGTGCGCGTCT  
GGATGCATGGCCTCATGCACTGGTTGTTTCGTGGTAATCCGGTTGATGATGCAGCCCTGGGTAGCACT  
CCGTTTCATTGGCGTACCGCACGTACACCGGGTAGCCGTCCGCTGAGCTTCCTGCTGATGCTGTATG  
CAGGTCTGCTGGGTGATGTTTTTGGTTGGGCAACCCAGCAGGATGGTCGTGTTGTTACCGATGTTCT  
GCCGATTAAGGTGGTGAACATACCCTGGTTAGCAGCAGCTCACGTCAAGAACTGGGTTGGCATAAC  
CGAAGATGCATTTAGCCCGTATCGTGCAGATTATGTTGGTCTGCTGAGCCTGCGTAATCCGGATGGT  
GTTGCCACCACCCTGGCAGGCGTTCCGCTGGATGATCTGGATGAACGCACCCTGGATGTTCTGTTTC  
AAGAACGTTTTCTGATTTCGTCGGATGATAGCCATCTGCAGGTTAATAACAGCACCCGCACAGCAGGG  
TCGTGTGGAATTTGAAGGTATTGCACAGGCAGCAGATCGTCCGGAACCGGTTGCCATTCTGACAGG  
TCATCGTGCCGCACCGCATCTGCGTGTTGATGGTGATTTTTTCAGCCCCTGCCGAAGGTGATGAAGAA  
GCCGCAGCGGCACTGGGCACCCTGCGTAAACTGATTGATGCAAGCCTGTATGAACTGGTTCTGGAT  
CAGGGTGATGTGGCCTTTATTGATAATCGTCGTGCCGTT**CAT**GGTCGTGTCGATTTTCAGCCTCGCTA  
TGATGGTCGCGATCGTTGGCTGAAACGTATTAACATTACCCGTGATCTGCATCGTAGCCGTAAAGCA  
TGGGCAGGCGATAGCCGTGTTCTGGGTGTCAGCGTTAA

*Streptococcus pneumoniae* MeHis

ATGGGCAGCAGCTGGAGTCACCCACAGTTTTGAGAAAGGCAGCCATATGGCTAGCATGACTGGTGGGA  
CAGCAAATGGGTCGCGGATCCGAATTCATGACCGAAAGCCCGACCACCCATCATGGTGCAGCACCG  
CCTGATAGCGTTGCAACACCGGTTTCGTCGTTGTCAGAAATTCGTCGACACCGGCAGAAGCAGCA  
GCAGCCGCAGCACTGGCAGCACGTTGTGCACAGCGTTATGATGAAACCGATGGTCCGGAATTTCTG  
CTGGATGCACCGGTTATTGCACATGAACTGCCTCGTCGTCTGCGTACCTTTATGGCACGTGCGCGTCT  
GGATGCATGGCCTCATGCACTGGTTGTTTCGTGGTAATCCGGTTGATGATGCAGCCCTGGGTAGCACT  
CCGTTTCATTGGCGTACCGCACGTACACCGGGTAGCCGTCCGCTGAGCTTCCTGCTGATGCTGTATG  
CAGGTCTGCTGGGTGATGTTTTTGGTTGGGCAACCCAGCAGGATGGTCGTGTTGTTACCGATGTTCT  
GCCGATTAAGGTGGTGAACATACCCTGGTTAGCAGCAGCTCACGTCAAGAACTGGGTTGGCATAAC  
CGAAGATGCATTTAGCCCGTATCGTGCAGATTATGTTGGTCTGCTGAGCCTGCGTAATCCGGATGGT  
GTTGCCACCACCCTGGCAGGCGTTCCGCTGGATGATCTGGATGAACGCACCCTGGATGTTCTGTTTC  
AAGAACGTTTTCTGATTTCGTCGGATGATAGCCATCTGCAGGTTAATAACAGCACCCGCACAGCAGGG  
TCGTGTGGAATTTGAAGGTATTGCACAGGCAGCAGATCGTCCGGAACCGGTTGCCATTCTGACAGG  
TCATCGTGCCGCACCGCATCTGCGTGTTGATGGTGATTTTTTCAGCCCCTGCCGAAGGTGATGAAGAA  
GCCGCAGCGGCACTGGGCACCCTGCGTAAACTGATTGATGCAAGCCTGTATGAACTGGTTCTGGAT  
CAGGGTGATGTGGCCTTTATTGATAATCGTCGTGCCGTT**TAG**GGTCGTGTCGATTTTCAGCCTCGCT  
ATGATGGTCGCGATCGTTGGCTGAAACGTATTAACATTACCCGTGATCTGCATCGTAGCCGTAAAGC  
ATGGGCAGGCGATAGCCGTGTTCTGGGTGTCAGCGTTAA

## Protein sequences

### *His<sub>6</sub>-VioC*

MGSSHHHHHHSSGLVPRGSHMASMTGGQQMGRGSEFMTESPTTHHGAAPPDSVATPVRPWSEFRL  
TPAEAAAAAALAAARCAQRYDETDGPEFLLDAPVIAHELPRRLRTFMARARLDAWPHALVVRGNPVDDA  
ALGSTPVHWRTARTPGSRPLSFLLMYAGLLGDVFGWATQQDGRVVTDVLPKGGHEHTLVSSSSRQELG  
WHTEDAFSPYRADYVGLLSLRNPDGVATTLAGVPLDDLERTLDVLFQERFLIRPDDSHLQVNNSTAQQ  
GRVEFEGIAQAADRPEPVAILTGHRAAPHLRVDGDFSAPAEGDEEAAAALGTLRKLIDASLYELVLDQGD  
VAFIDNRRRAVHGRRAFQPRYDGRDRWLKRINITRDLHRSRKAWAGDSRVLGQR-

### *His<sub>6</sub>-VioC MeHis316*

MGSSHHHHHHSSGLVPRGSHMASMTGGQQMGRGSEFMTESPTTHHGAAPPDSVATPVRPWSEFRL  
TPAEAAAAAALAAARCAQRYDETDGPEFLLDAPVIAHELPRRLRTFMARARLDAWPHALVVRGNPVDDA  
ALGSTPVHWRTARTPGSRPLSFLLMYAGLLGDVFGWATQQDGRVVTDVLPKGGHEHTLVSSSSRQELG  
WHTEDAFSPYRADYVGLLSLRNPDGVATTLAGVPLDDLERTLDVLFQERFLIRPDDSHLQVNNSTAQQ  
GRVEFEGIAQAADRPEPVAILTGHRAAPHLRVDGDFSAPAEGDEEAAAALGTLRKLIDASLYELVLDQGD  
VAFIDNRRRAV(MeHis)GRRAFQPRYDGRDRWLKRINITRDLHRSRKAWAGDSRVLGQR-

### *StrepII-VioC*

MGSSWSHPQFEKGSMSMASMTGGQQMGRGSEFMTESPTTHHGAAPPDSVATPVRPWSEFRLTPAEA  
AAAAAALAAARCAQRYDETDGPEFLLDAPVIAHELPRRLRTFMARARLDAWPHALVVRGNPVDDAALGST  
PVHWRTARTPGSRPLSFLLMYAGLLGDVFGWATQQDGRVVTDVLPKGGHEHTLVSSSSRQELGWHT  
DAFSPYRADYVGLLSLRNPDGVATTLAGVPLDDLERTLDVLFQERFLIRPDDSHLQVNNSTAQQGRVE  
FEGIAQAADRPEPVAILTGHRAAPHLRVDGDFSAPAEGDEEAAAALGTLRKLIDASLYELVLDQGDVAFID  
NRRRAVHGRRAFQPRYDGRDRWLKRINITRDLHRSRKAWAGDSRVLGQR-

### *StrepII-VioC MeHis316*

MGSSWSHPQFEKGSMSMASMTGGQQMGRGSEFMTESPTTHHGAAPPDSVATPVRPWSEFRLTPAEA  
AAAAAALAAARCAQRYDETDGPEFLLDAPVIAHELPRRLRTFMARARLDAWPHALVVRGNPVDDAALGST  
PVHWRTARTPGSRPLSFLLMYAGLLGDVFGWATQQDGRVVTDVLPKGGHEHTLVSSSSRQELGWHT  
DAFSPYRADYVGLLSLRNPDGVATTLAGVPLDDLERTLDVLFQERFLIRPDDSHLQVNNSTAQQGRVE  
FEGIAQAADRPEPVAILTGHRAAPHLRVDGDFSAPAEGDEEAAAALGTLRKLIDASLYELVLDQGDVAFID  
NRRRAV(MeHis)GRRAFQPRYDGRDRWLKRINITRDLHRSRKAWAGDSRVLGQR-

## Supplementary Tables

**Supplementary Table S1.** Protein mass spectrometry

| Protein               | Calculated (Da) | Observed (Da) |
|-----------------------|-----------------|---------------|
| StrepII-VioC          | 42636.7         | 42636.0       |
| StrepII-VioC MeHis316 | 42650.7         | 42649.0       |

**Supplementary Table S2.** Data collection and refinement statistics for structure determination of His<sub>6</sub>-VioC MeHis316

|                                    | <b>VioC MeHis316</b>     |
|------------------------------------|--------------------------|
| PDB ID                             | 9EQF                     |
| Wavelength (Å)                     | 0.976                    |
| Resolution range                   | 38.48 - 1.6 (1.64 - 1.6) |
| Space group                        | C 1 2 1                  |
| Unit cell dimensions               |                          |
| a, b, c, (Å)                       | 81.1 67.1 63.0           |
| α, β, γ (°)                        | 90 109.2 90              |
| Total reflections                  | 278892 (14180)           |
| Unique reflections                 | 41962 (2681)             |
| Multiplicity                       | 6.6 (5.3)                |
| Completeness (%)                   | 99.61 (96.09)            |
| Mean I/sigma(I)                    | 15.47 (1.86)             |
| Wilson B-factor (Å <sup>2</sup> )  | 17.87                    |
| R-merge                            | 0.05875 (0.4329)         |
| R-meas                             | 0.06364 (0.4804)         |
| R-pim                              | 0.02425 (0.2041)         |
| CC <sub>1/2</sub>                  | 0.999 (0.922)            |
| CC*                                | 1 (0.98)                 |
| Reflections used in refinement     | 41951 (2678)             |
| Reflections used for R-free        | 2082 (110)               |
| R-work                             | 0.1573 (0.2354)          |
| R-free                             | 0.1865 (0.2619)          |
| Protein residues                   | 336                      |
| RMS(bonds)                         | 0.003                    |
| RMS(angles)                        | 0.74                     |
| Ramachandran favoured (%)          | 97.56                    |
| Ramachandran allowed (%)           | 1.83                     |
| Ramachandran outliers (%)          | 0.61                     |
| Rotamer outliers (%)               | 1.4                      |
| Clashscore                         | 3.95                     |
| Average B-factor (Å <sup>2</sup> ) | 26.3                     |

**Supplementary Table S3.** Absolute energies, zero-point energies and free energies (in a.u.), and relative energies (in kcal mol<sup>-1</sup>) of the optimized geometries for the Fe(IV) and Fe(III) complexes of as obtained in Gaussian-16 from model A. All calculations were done in the gas phase.

|               | E [a.u.]     | ZPE [a.u.] | G [a.u.]     | Relative to Fe(IV)<br>[kcal mol <sup>-1</sup> ] |
|---------------|--------------|------------|--------------|-------------------------------------------------|
| WT Fe(IV)     | -5633.509411 | 2.058883   | -5631.651381 | 0.00                                            |
| WT Fe(III)    | -5633.642732 | 2.055663   | -5631.786492 | -85.68                                          |
| MeHis Fe(IV)  | -5596.379568 | 2.060985   | -5594.518547 | 0.00                                            |
| MeHis Fe(III) | -5596.514536 | 2.058215   | -5594.661565 | -86.43                                          |

**Supplementary Table S4.** Group Mulliken spin-densities for both wildtype (WT) VioC and VioC MeHis316 model optimized geometries for the Fe(IV) and Fe(III) complexes from model A, calculated at UB3LYP/6-31G\* level of theory.

|               | Fe    | O     | Succinate | Arg sub | Glu <sub>170</sub> | (Me)His <sub>316</sub> | His <sub>168</sub> |
|---------------|-------|-------|-----------|---------|--------------------|------------------------|--------------------|
| WT Fe(IV)     | 3.039 | 0.643 | 0.167     | 0.005   | 0.101              | -0.004                 | 0.045              |
| WT Fe(III)    | 3.845 | 0.832 | 0.113     | 0.011   | 0.088              | 0.037                  | 0.068              |
| MeHis Fe(IV)  | 3.036 | 0.643 | 0.167     | 0.005   | 0.103              | -0.004                 | 0.046              |
| MeHis Fe(III) | 3.873 | 0.840 | 0.115     | 0.006   | 0.075              | 0.027                  | 0.061              |

**Supplementary Table S5.** Absolute energies (in a.u.) and relative energies (in kcal mol<sup>-1</sup>) of single point geometries for Fe(IV) and Fe(III) models to assess the adiabatic electron affinity of VioC and VioC MeHis316 in model A. Energies were calculated for models of VioC, VioC MeHis316, and the wildtype without the ordered water molecule H-bonding to His316 N<sub>δ</sub> were calculated in Gaussian-16. All calculations were done in the gas phase.

|                                  | E [a.u.]     | Relative to Fe(IV) [kcal mol <sup>-1</sup> ] |
|----------------------------------|--------------|----------------------------------------------|
| WT Fe(IV)                        | -5633.509411 | 0.00                                         |
| WT Fe(III)                       | -5633.598648 | -56.00                                       |
| MeHis Fe(IV)                     | -5596.379568 | 0.00                                         |
| MeHis Fe(III)                    | -5596.470848 | -57.28                                       |
| WT Fe(IV) – no H <sub>2</sub> O  | -5557.056319 | 0.00                                         |
| WT Fe(III) – no H <sub>2</sub> O | -5557.151635 | -59.81                                       |

**Supplementary Table S6.** Group Mulliken spin-densities for both wildtype (WT) VioC and VioC MeHis316 optimized geometries, calculated at UB3LYP/BS1.

|                                    | Fe   | O     | Succ | Arg(OH) | GLU <sub>170</sub> | (Me)HIS <sub>316</sub> | HIS <sub>168</sub> | H <sub>2</sub> O <sub>CRY</sub> | Prot  |
|------------------------------------|------|-------|------|---------|--------------------|------------------------|--------------------|---------------------------------|-------|
| <sup>5</sup> Re <sub>WT</sub>      | 3.19 | 0.65  | 0.13 | 0.00    | 0.10               | -0.11                  | 0.04               | 0.00                            | 0.00  |
| <sup>5</sup> Re <sub>MeHis</sub>   | 3.19 | 0.69  | 0.18 | 0.00    | 0.05               | -0.11                  | 0.01               | -0.01                           | -0.01 |
| <sup>5</sup> TS <sub>1,WT</sub>    | 4.12 | -0.09 | 0.22 | -0.36   | 0.07               | 0.03                   | 0.01               | 0.00                            | 0.00  |
| <sup>5</sup> TS <sub>1,MeHis</sub> | 4.12 | -0.07 | 0.22 | -0.36   | 0.06               | 0.02                   | 0.02               | 0.00                            | -0.01 |
| <sup>5</sup> I <sub>WT</sub>       | 4.33 | 0.23  | 0.26 | -0.96   | 0.12               | 0.03                   | 0.00               | 0.00                            | 0.00  |
| <sup>5</sup> I <sub>MeHis</sub>    | 4.34 | 0.26  | 0.25 | -0.99   | 0.11               | 0.01                   | 0.01               | 0.00                            | 0.00  |
| <sup>5</sup> TS <sub>2,WT</sub>    | 4.26 | 0.25  | 0.22 | -0.85   | 0.09               | 0.03                   | 0.01               | 0.00                            | -0.01 |
| <sup>5</sup> TS <sub>2,MeHis</sub> | 4.28 | 0.26  | 0.22 | -0.86   | 0.09               | 0.01                   | 0.02               | 0.00                            | -0.01 |
| <sup>5</sup> P <sub>WT</sub>       | 3.83 | -     | 0.09 | 0.00    | 0.03               | 0.02                   | 0.02               | 0.00                            | 0.00  |
| <sup>5</sup> P <sub>MeHis</sub>    | 4.34 | -     | 0.25 | -0.73   | 0.11               | 0.01                   | 0.01               | 0.00                            | 0.00  |

**Supplementary Table S7.** Calculated Kinetic Isotope Effects (KIEs) for C-H abstraction by the ferryl intermediates in VioC and VioC MeHis316 and the imaginary frequencies for the transition states of C-H/D abstraction. Eyring primary (**KIE<sup>a</sup>**) kinetic isotope effects for HAT as well as the KIEs in perdeuterated substrate (**KIE<sup>b</sup>**) were calculated for both VioC and VioC MeHis316 models. Values in brackets are the KIEs including a Wigner correction using the imaginary frequencies of the transition state barriers to C-H and C-D abstraction.<sup>7</sup>

|                                                   | VioC         | VioC MeHis316 |
|---------------------------------------------------|--------------|---------------|
| KIE <sup>a</sup>                                  | 6.67 (8.89)  | 6.48 (8.53)   |
| KIE <sup>b</sup>                                  | 7.87 (10.49) | 7.80 (10.27)  |
| Frequency TS <sub>(C-H)</sub> (cm <sup>-1</sup> ) | i1182.6      | i1154.0       |
| Frequency TS <sub>(C-D)</sub> (cm <sup>-1</sup> ) | i909.5       | i892.9        |

**Supplementary Table S8.** Kinetic parameters for ferryl formation and decay from stopped-flow UV-vis measurement. Values and standard errors are presented from triplicate measurements.

|                                  | VioC                         |                              | VioC MeHis316                |                              |
|----------------------------------|------------------------------|------------------------------|------------------------------|------------------------------|
|                                  | <i>h</i> <sub>γ</sub> -L-Arg | <i>d</i> <sub>γ</sub> -L-Arg | <i>h</i> <sub>γ</sub> -L-Arg | <i>d</i> <sub>γ</sub> -L-Arg |
| k <sub>form,obs</sub>            | 41.2 ± 0.7                   | 29.6 ± 1.0                   | 46.8 ± 1.0                   | 24.9 ± 0.5                   |
| k <sub>H</sub> or k <sub>D</sub> | 11.9 ± 0.1                   | 0.28 ± 0.01                  | 8.3 ± 0.1                    | 0.29 ± 0.01                  |
| ΔA <sub>1</sub>                  | 0.070 ± 0.002                | 0.075 ± 0.002                | 0.030 ± 0.001                | 0.035 ± 0.001                |
| ΔA <sub>2</sub>                  | 0.30 ± 0.01                  | 0.34 ± 0.01                  | 0.20 ± 0.01                  | 0.26 ± 0.01                  |

**Supplementary Table S9.** Observed kinetic isotope effects. Kinetic isotope effects are given for the formation ( $k_{\text{form,obs}}$ ) and decay ( $k$ ) of the ferryl intermediate with errors propagated from triplicate measurements of  $k_{1,\text{obs}}(\text{H})$ ,  $k_{1,\text{obs}}(\text{D})$ ,  $k_2(\text{H})$ , and  $k_2(\text{D})$ .

|                                                               | VioC          | VioC MeHis316 |
|---------------------------------------------------------------|---------------|---------------|
| $k_{\text{form,obs}}(\text{H})/k_{\text{form,obs}}(\text{D})$ | $1.4 \pm 0.1$ | $1.9 \pm 0.1$ |
| $k_{\text{H}}/k_{\text{D}}$                                   | $43 \pm 1$    | $29 \pm 1$    |

**Supplementary Table S10.** Primers used in this study

| Primer Name | Sequence                                                   |
|-------------|------------------------------------------------------------|
| VioC_fwd    | CGCGGATCCGAATTC                                            |
| VioC_rev    | GTGGTGGTGCTCG                                              |
| H316TAG_fwd | AATCGTCGTGCCGTTTAGGGTCGTCGTGCATTT                          |
| H316_rev    | AACGGCACGACGA                                              |
| VioC_fwd2   | GCCAGCCATATGGCT                                            |
| VioC_rev2   | GCTGCTGCCCATGG                                             |
| Strep_A     | ACCATGGGCAGCAGCTGGAGTCACCCACAGTTTGAGAAAGGCAGC<br>CATATGGCT |
| Strep_B     | AGCCATATGGCTGCCTTTCTCAAAGTGTGGGTGACTCCAGCTGCT<br>GCCCATGGT |

**Supplementary Table S11.** Buffers used in this study

| Buffer          | Components                                                                               | pH  |
|-----------------|------------------------------------------------------------------------------------------|-----|
| NP              | 50 mM $\text{NaH}_2\text{PO}_4$ , 300 mM NaCl, adjust pH with NaOH                       | 8   |
| NPD             | 50 mM $\text{NaH}_2\text{PO}_4$ , 300 mM NaCl, 2.5 mM desthiobiotin, adjust pH with NaOH | 8   |
| Lysis buffer    | 50 mM HEPES, 300 mM NaCl, 20 mM imidazole, adjust pH with HCl                            | 7.5 |
| Elution buffer  | 50 mM HEPES, 300 mM NaCl, 250 mM imidazole, adjust pH with HCl                           | 7.5 |
| Reaction buffer | 100 mM Tris                                                                              | 7.5 |

## Supplementary Figures

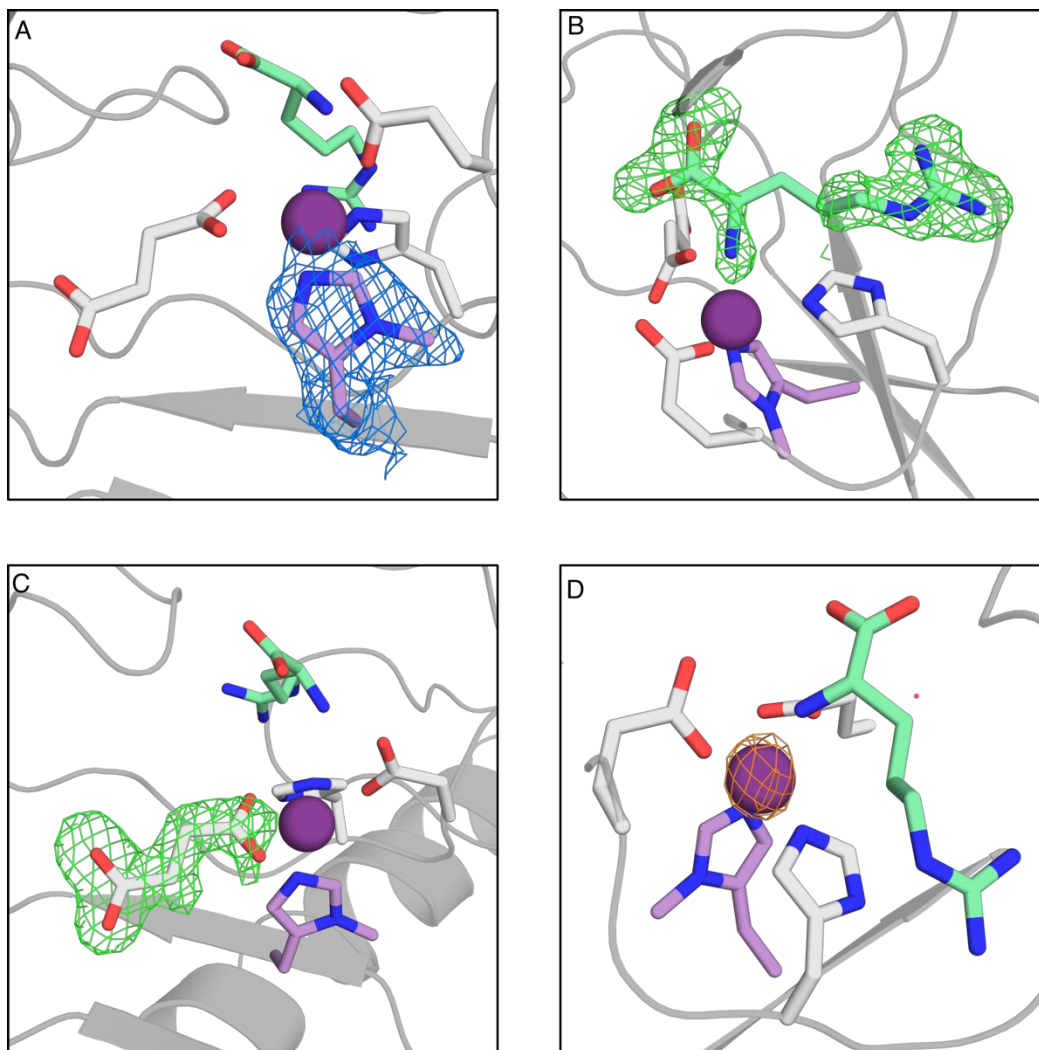

**Supplementary Figure S1.** Structural characterization of VioC MeHis316. Active site residues, MeHis316 and the substrate L-Arg and are shown as atom-coloured sticks, with purple, grey, and green carbons, respectively. The iron cofactor is shown as a purple sphere. A) A  $2F_o-F_c$  map is shown around the MeHis, contoured at  $1\sigma$ . B) An  $F_o-F_c$  omit map is shown around the substrate L-Arg, contoured at  $2.5\sigma$ . C) An  $F_o-F_c$  omit map is shown around succinate, contoured at  $2.5\sigma$ . D) An anomalous map is shown around the Fe, contoured at  $3\sigma$ .



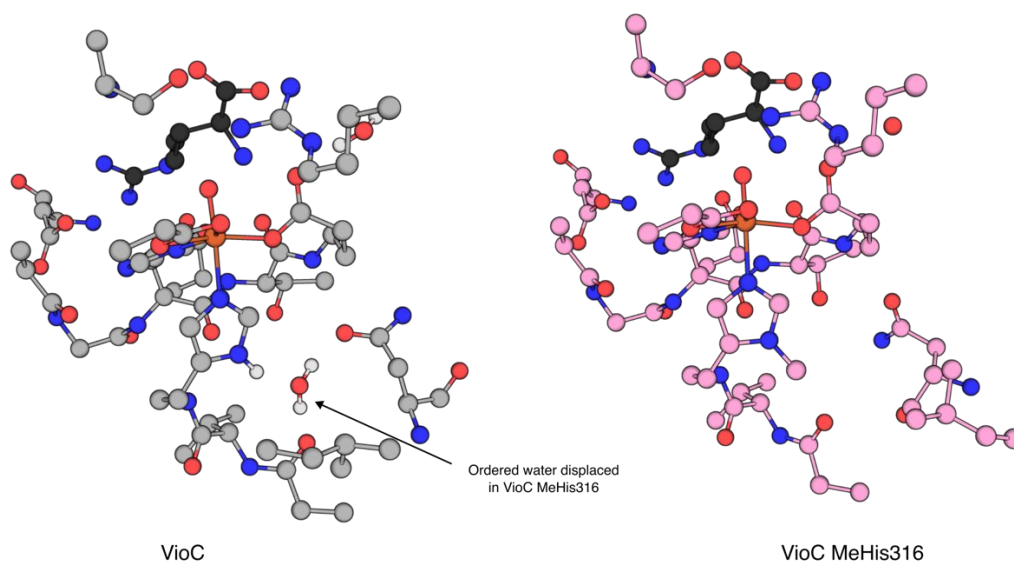

**Supplementary Figure S2.** QM cluster model A. A QM cluster model was generated to probe the electron affinity of the ferryl intermediates in VioC and VioC MeHis316. The cluster model, in addition to the ferryl intermediate, contained the side chains of the residues (Me)His316, His168, Glu170, Arg334, Ser158, Asp286, Thr169, Val315, Asn311, Ile309, Gly166, succinate and arginine for a total of 240 atoms.

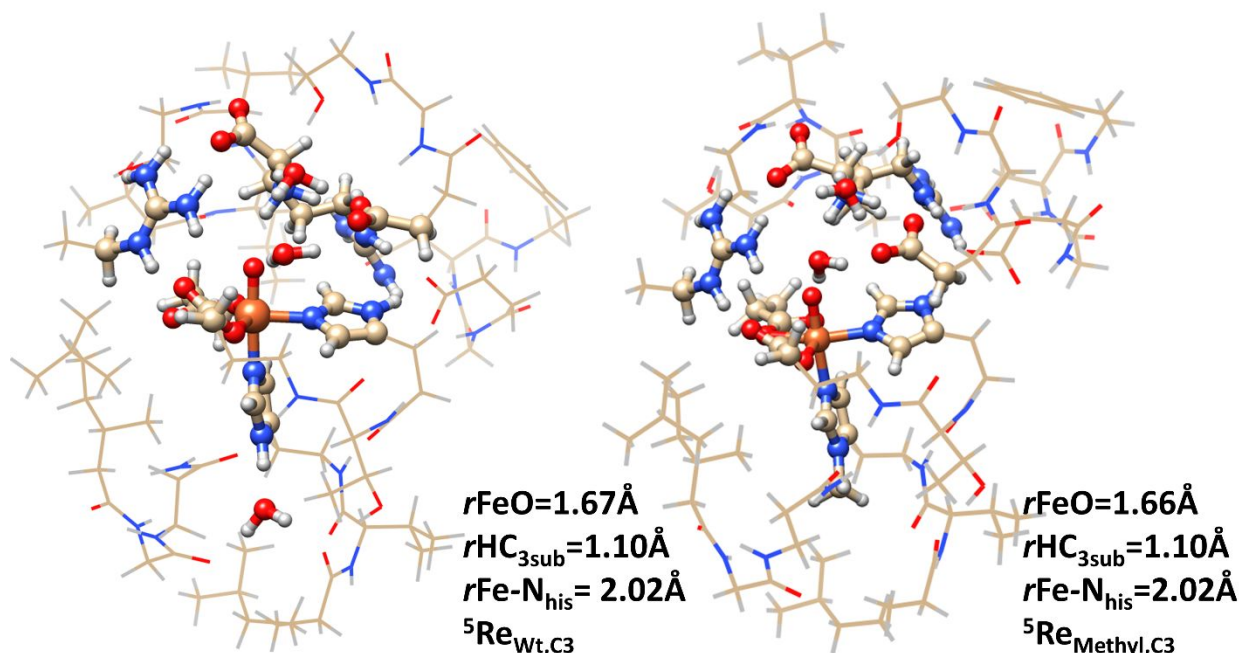

**Supplementary Figure S3.** QM cluster model B. A QM cluster model was generated to probe the energy landscapes for L-Arg hydroxylation. Optimised geometries of DFT models of the ferryl states in VioC and VioC MeHis316 are shown. This larger cluster model includes additional residues in proximity to the substrate L-Arginine *c.f.* that shown in Supplementary Figure S2, giving a total of 353 atoms in this larger QM cluster. This model contains the ferryl intermediate bound to succinate, which was positioned *cis* to the peptide chain His168–Thr169–Glu170 and *trans* to the peptide chain His316–Val315–Ala314. In addition, several small peptide chains were included that position the substrate, namely,

Thr155–Leu156–Val157–Ser158, Asp222–Asp223–Ser224, Asp268–Gly269–Asp270–Phe271, and Ile309–Asp310–Asn311. Arg334 side chain, Leu196 and two crystal water molecules were also included.

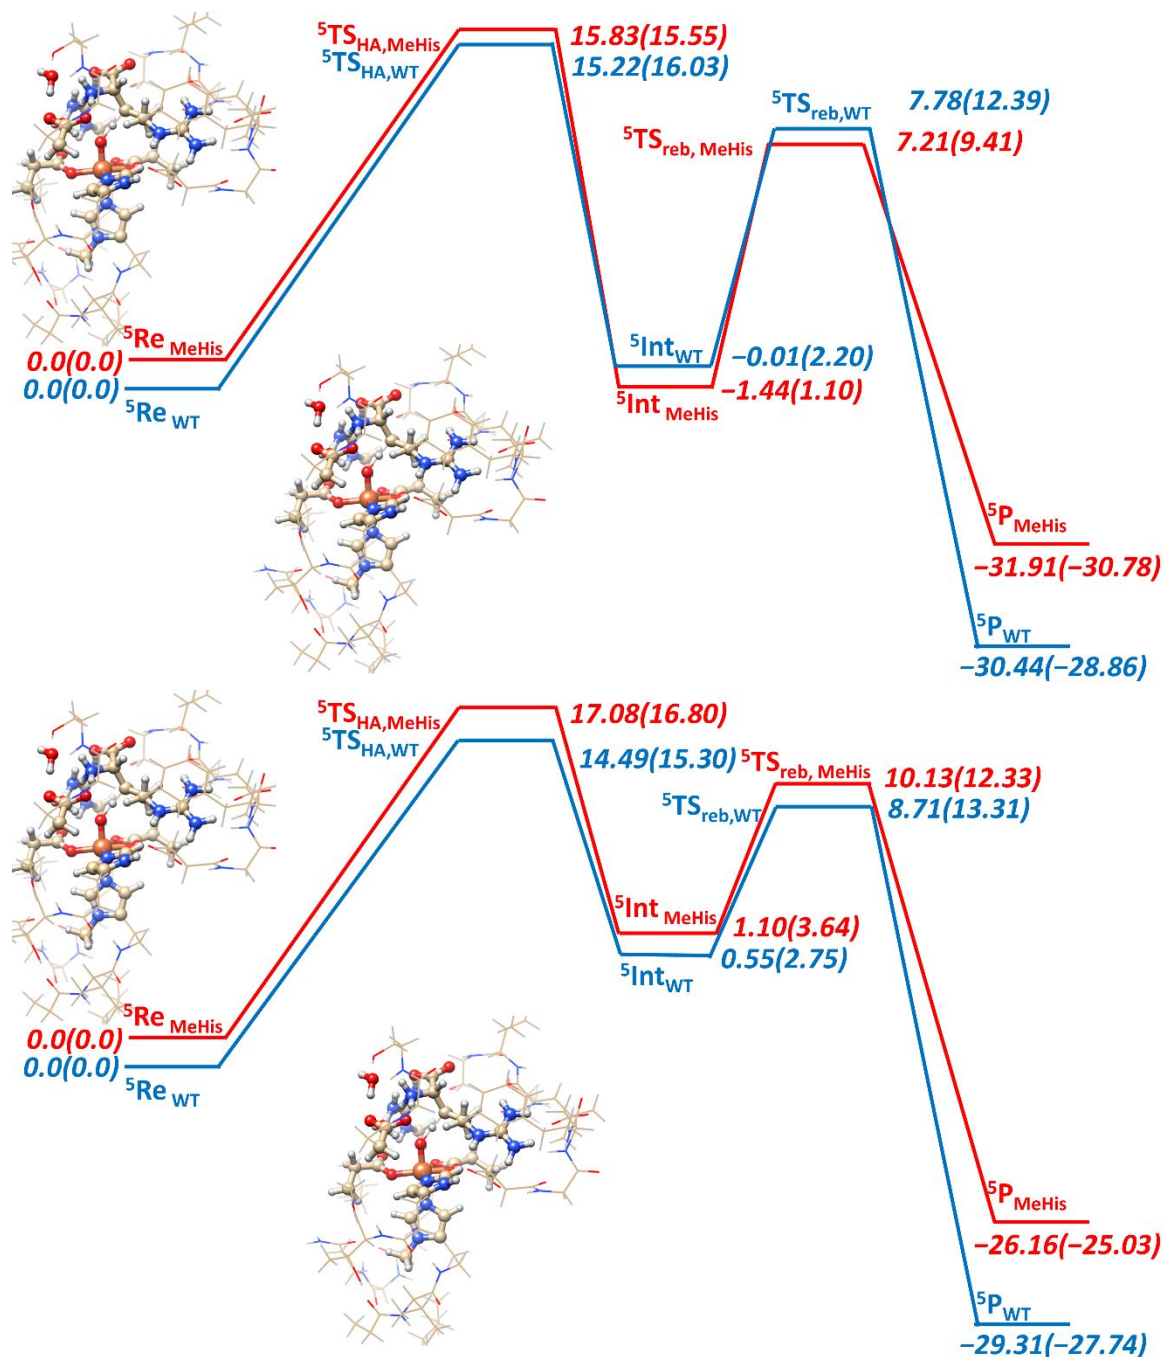

**Supplementary Figure S4.** Calculated reaction landscapes for WT VioC and VioC MeHis316 cluster models. (upper) Energies given as both zero-point ( $\Delta E+ZPE$ ) energies and free energies in parenthesis. All energies given in kcal mol<sup>-1</sup> as calculated at UB3LYP/BS2 level of theory. (upper) energies calculated in gas phase, (lower) solvent corrected energies.

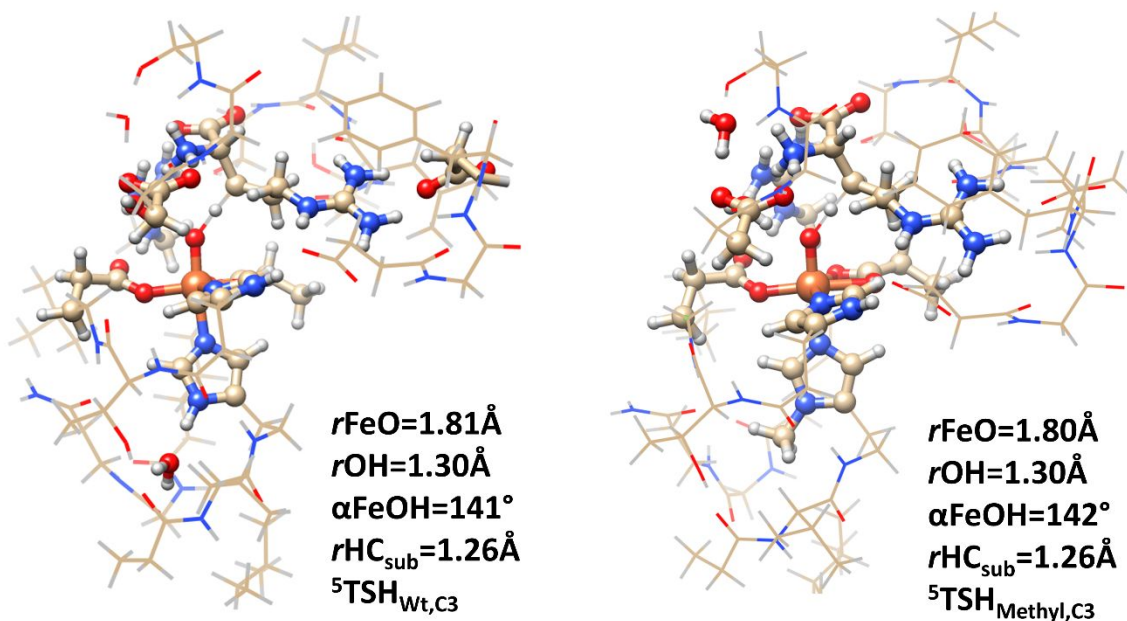

**Supplementary Figure S5.** Structure and important bonding information for the hydrogen atom abstraction transition state structures of (left) VioC and (right) VioC MeHis316.

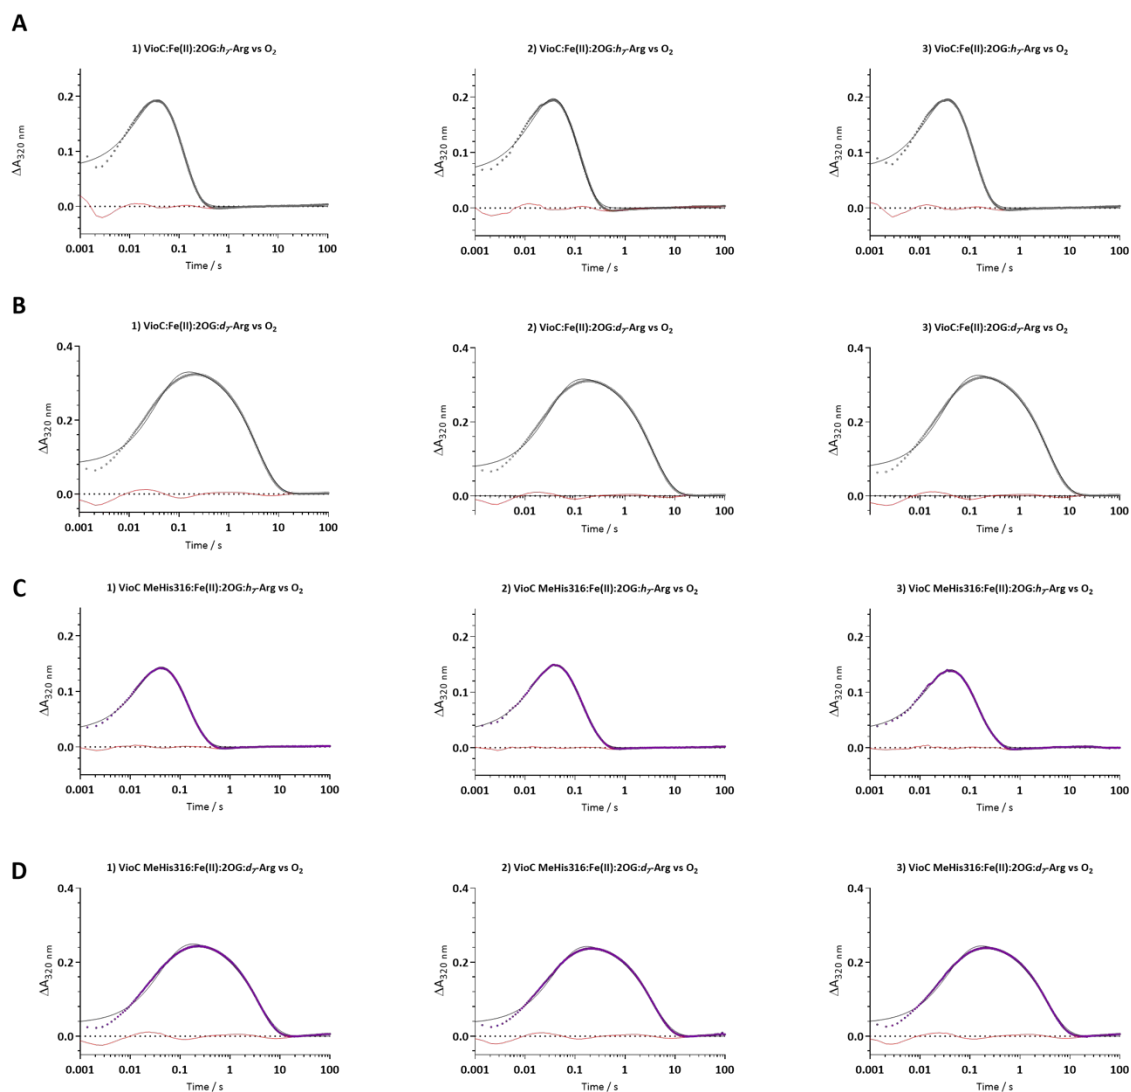

**Supplementary Figure S6.** Fits of stopped-flow data to kinetic models. Time dependent absorbance changes at 320 nm are shown after rapid mixing an anoxic reactant complex VioC/VioC MeHis316:h<sub>7</sub>-Arg/d<sub>7</sub>-Arg:2OG:Fe(II) with aerobic buffer. Data points are shown as dots and the fitted models overlaid as black lines. The residuals from fitting the model to the data are shown for each measurement as a red line. Final concentration after mixing at 5 °C with air-saturated buffer are 500 μM enzyme, 3 mM 2OG, 3 mM h<sub>7</sub>-Arg or per-d<sub>7</sub>-Arg, and 500 μM (NH<sub>4</sub>)<sub>2</sub>Fe(SO<sub>4</sub>)<sub>2</sub>(H<sub>2</sub>O)<sub>6</sub>. A1-3) The formation and decay of the ferryl intermediate of VioC in reaction with h<sub>7</sub>-Arg. B1-3) The formation and decay of the ferryl intermediate of VioC in reaction with d<sub>7</sub>-Arg. C1-3) The formation and decay of the ferryl intermediate of VioC MeHis316 in reaction with h<sub>7</sub>-Arg. D1-3) The formation and decay of the ferryl intermediate of VioC MeHis316 in reaction with d<sub>7</sub>-Arg.

## Supplementary References

- (1) Emsley, P.; Cowtan, K. Coot: model-building tools for molecular graphics. *Acta Crystallographica Section D* **2004**, *60* (12), 2126-2132.
- (2) Liebschner, D.; Afonine, P. V.; Baker, M. L.; Bunkoczi, G.; Chen, V. B.; Croll, T. I.; Hintze, B.; Hung, L.-W.; Jain, S.; McCoy, A. J.; et al. Macromolecular structure determination using X-rays, neutrons and electrons: recent developments in Phenix. *Acta Crystallographica Section D* **2019**, *75* (10), 861-877.
- (3) Joosten, R. P.; Long, F.; Murshudov, G. N.; Perrakis, A. The PDB\_REDO server for macromolecular structure model optimization. *IUCrJ* **2014**, *1* (4), 213-220.
- (4) Grimme, S.; Antony, J.; Ehrlich, S.; Krieg, H. A consistent and accurate ab initio parametrization of density functional dispersion correction (DFT-D) for the 94 elements H-Pu. *The Journal of chemical physics* **2010**, *132*, 154104-154104.
- (5) Tomasi, J.; Mennucci, B.; Cammi, R. Quantum Mechanical Continuum Solvation Models. *Chemical Reviews* **2005**, *105* (8), 2999-3094. DOI: 10.1021/cr9904009.
- (6) Frisch, M. J.; Trucks, G. W.; Schlegel, H. B.; Scuseria, G. E.; Robb, M. A.; Cheeseman, J. R.; G. Scalmani, V. B.; Mennucci, B.; Petersson, G. A.; Nakatsuji, H.; et al. Gaussian 09, Revis. B.01, Gaussian, Inc., Wallingford CT, 200.
- (7) Bell, R. P. *The Tunnel Effect in Chemistry*; Springer New York, NY, 1980. DOI: <https://doi.org/10.1007/978-1-4899-2891-7>.

### Cartesian coordinates for model A

VioC MeHis316 Fe(IV) complex

|   |             |              |              |
|---|-------------|--------------|--------------|
| 6 | 5.698220000 | 13.679212000 | 21.793767000 |
| 6 | 4.452427000 | 12.908373000 | 21.379226000 |
| 8 | 4.287879000 | 11.689472000 | 21.606623000 |
| 1 | 6.105235000 | 14.156297000 | 20.888423000 |
| 1 | 5.379125000 | 14.505548000 | 22.442311000 |
| 7 | 3.051301000 | 11.230946000 | 18.830421000 |
| 6 | 3.859856000 | 10.888553000 | 17.669985000 |
| 6 | 3.513112000 | 9.542389000  | 16.993987000 |
| 8 | 2.843249000 | 8.650888000  | 17.532539000 |
| 6 | 5.370440000 | 10.925217000 | 18.036844000 |
| 6 | 5.830760000 | 9.779940000  | 18.886504000 |
| 6 | 6.248521000 | 8.523615000  | 18.519528000 |
| 7 | 5.907351000 | 9.797027000  | 20.271063000 |
| 6 | 6.359548000 | 8.596399000  | 20.689809000 |
| 7 | 6.566653000 | 7.800619000  | 19.647622000 |
| 1 | 3.686987000 | 11.678791000 | 16.935450000 |
| 1 | 5.573565000 | 11.886688000 | 18.523406000 |
| 1 | 5.933878000 | 10.926139000 | 17.101862000 |
| 1 | 3.402266000 | 10.934499000 | 19.737070000 |
| 1 | 6.317111000 | 8.112222000  | 17.523840000 |
| 1 | 6.553105000 | 8.337817000  | 21.718019000 |
| 7 | 4.058398000 | 9.438517000  | 15.758360000 |
| 6 | 3.975208000 | 8.257751000  | 14.918157000 |
| 6 | 5.266480000 | 7.403421000  | 14.973014000 |
| 8 | 6.360872000 | 7.854107000  | 15.356649000 |
| 6 | 3.540745000 | 8.711563000  | 13.481009000 |
| 6 | 3.995410000 | 7.866442000  | 12.297639000 |
| 8 | 2.103833000 | 8.751269000  | 13.430392000 |
| 1 | 3.173026000 | 7.628313000  | 15.314059000 |
| 1 | 3.937198000 | 9.723989000  | 13.340246000 |
| 1 | 3.601083000 | 8.320324000  | 11.383488000 |
| 1 | 5.087353000 | 7.852371000  | 12.230113000 |
| 1 | 3.635623000 | 6.836109000  | 12.353090000 |
| 1 | 1.801358000 | 9.448972000  | 14.034843000 |
| 1 | 4.593306000 | 10.247600000 | 15.370873000 |
| 7 | 5.061238000 | 6.130161000  | 14.589532000 |
| 6 | 6.056925000 | 5.074752000  | 14.660525000 |
| 6 | 5.577656000 | 3.928497000  | 15.577803000 |
| 6 | 6.732159000 | 3.203092000  | 16.295754000 |
| 6 | 7.519231000 | 4.211859000  | 17.135169000 |
| 8 | 6.854568000 | 4.677519000  | 18.146077000 |
| 8 | 8.653884000 | 4.570189000  | 16.778513000 |
| 1 | 6.974463000 | 5.525354000  | 15.040433000 |
| 1 | 4.976480000 | 3.215942000  | 15.002849000 |
| 1 | 4.917071000 | 4.361113000  | 16.336096000 |
| 1 | 7.414236000 | 2.725415000  | 15.586104000 |
| 1 | 6.322603000 | 2.424880000  | 16.949896000 |
| 1 | 4.126721000 | 5.838098000  | 14.291863000 |
| 6 | 2.859469000 | 13.989607000 | 14.592501000 |
| 6 | 3.417735000 | 12.691982000 | 13.983357000 |
| 6 | 4.943394000 | 12.611965000 | 14.149714000 |
| 8 | 5.467680000 | 11.573189000 | 14.689687000 |
| 8 | 5.600593000 | 13.609025000 | 13.767538000 |
| 7 | 5.309288000 | 17.399742000 | 15.642584000 |
| 6 | 5.715740000 | 18.183082000 | 16.811767000 |
| 6 | 6.425004000 | 19.440051000 | 16.326025000 |
| 8 | 7.289798000 | 20.036594000 | 16.931066000 |
| 6 | 6.516935000 | 17.452894000 | 17.915467000 |
| 6 | 5.788713000 | 16.280924000 | 18.638596000 |

|   |              |              |              |
|---|--------------|--------------|--------------|
| 8 | 4.657477000  | 16.470827000 | 19.125219000 |
| 8 | 6.440237000  | 15.169937000 | 18.697759000 |
| 1 | 4.782352000  | 18.543264000 | 17.275353000 |
| 1 | 6.787195000  | 18.195397000 | 18.677069000 |
| 1 | 7.460467000  | 17.087215000 | 17.493265000 |
| 1 | 6.094732000  | 16.865730000 | 15.273019000 |
| 6 | 1.147658000  | -0.595784000 | 18.682522000 |
| 6 | 0.821400000  | -0.632537000 | 17.182124000 |
| 6 | 0.226608000  | -2.000345000 | 16.789062000 |
| 6 | 2.065975000  | -0.274725000 | 16.352968000 |
| 6 | -0.372323000 | -2.064392000 | 15.379155000 |
| 1 | 1.905666000  | -1.348391000 | 18.936346000 |
| 1 | 0.050370000  | 0.132881000  | 16.991676000 |
| 1 | -0.554924000 | -2.263559000 | 17.514981000 |
| 1 | 1.007350000  | -2.768305000 | 16.891772000 |
| 1 | 2.857297000  | -1.021137000 | 16.502318000 |
| 1 | 1.857735000  | -0.223468000 | 15.278635000 |
| 1 | 2.471457000  | 0.698772000  | 16.656962000 |
| 1 | -1.187729000 | -1.336591000 | 15.265857000 |
| 1 | 0.372825000  | -1.862038000 | 14.601632000 |
| 1 | -0.794741000 | -3.054833000 | 15.175989000 |
| 7 | 0.125115000  | 1.251171000  | 13.501739000 |
| 6 | 0.435726000  | 2.622906000  | 13.939431000 |
| 6 | -0.822982000 | 3.232005000  | 14.551999000 |
| 8 | -1.503168000 | 4.087770000  | 14.018435000 |
| 6 | 0.966170000  | 3.448247000  | 12.759592000 |
| 6 | 1.603464000  | 4.766781000  | 13.196962000 |
| 7 | 0.839392000  | 5.871690000  | 13.094664000 |
| 8 | 2.775750000  | 4.778697000  | 13.600067000 |
| 6 | -3.230231000 | 5.060051000  | 17.793849000 |
| 6 | -1.827161000 | 5.644988000  | 17.639123000 |
| 8 | -0.832067000 | 4.952212000  | 17.424180000 |
| 7 | -1.775332000 | 7.008156000  | 17.763524000 |
| 6 | -0.520518000 | 7.696731000  | 18.015241000 |
| 6 | -0.130200000 | 7.518297000  | 19.503011000 |
| 8 | -0.952613000 | 7.160627000  | 20.346259000 |
| 6 | -0.587294000 | 9.193483000  | 17.606321000 |
| 6 | -0.713215000 | 9.339184000  | 16.083296000 |
| 6 | -1.698712000 | 9.964906000  | 18.337053000 |
| 1 | 0.242134000  | 7.209383000  | 17.401681000 |
| 1 | 0.374371000  | 9.626727000  | 17.903316000 |
| 1 | -0.716750000 | 10.397490000 | 15.797761000 |
| 1 | 0.125605000  | 8.848372000  | 15.574134000 |
| 1 | -2.582627000 | 7.427115000  | 18.208040000 |
| 1 | -1.639530000 | 8.884351000  | 15.714410000 |
| 1 | -2.697179000 | 9.658806000  | 17.997581000 |
| 1 | -1.652179000 | 9.821713000  | 19.422376000 |
| 1 | -1.608644000 | 11.037292000 | 18.133292000 |
| 7 | 1.171090000  | 7.778386000  | 19.805578000 |
| 6 | 1.621804000  | 7.735400000  | 21.188382000 |
| 6 | 1.992127000  | 6.314271000  | 21.688828000 |
| 6 | 3.196605000  | 5.736059000  | 21.011090000 |
| 6 | 4.530585000  | 5.971292000  | 21.229726000 |
| 7 | 3.154724000  | 4.905535000  | 19.894174000 |
| 6 | 4.425469000  | 4.700746000  | 19.486626000 |
| 7 | 5.290836000  | 5.341741000  | 20.264179000 |
| 1 | 0.818857000  | 8.117911000  | 21.826081000 |
| 1 | 1.115311000  | 5.670243000  | 21.568592000 |
| 1 | 2.191558000  | 6.379086000  | 22.765537000 |
| 1 | 4.990268000  | 6.552989000  | 22.011546000 |
| 1 | 4.694702000  | 4.106361000  | 18.630747000 |
| 1 | 1.800688000  | 8.133170000  | 19.083344000 |
| 6 | 12.474672000 | -1.481513000 | 18.936856000 |



|   |             |              |              |   |              |              |              |
|---|-------------|--------------|--------------|---|--------------|--------------|--------------|
| 6 | 3.906025000 | 10.868341000 | 17.664992000 | 6 | -0.360965000 | -2.084638000 | 15.383010000 |
| 6 | 3.519847000 | 9.550632000  | 16.958545000 | 1 | 1.912498000  | -1.340683000 | 18.938822000 |
| 8 | 2.803611000 | 8.676268000  | 17.462794000 | 1 | 0.047538000  | 0.120352000  | 16.988575000 |
| 6 | 5.403099000 | 10.830183000 | 18.082916000 | 1 | -0.542345000 | -2.279830000 | 17.519689000 |
| 6 | 5.802526000 | 9.664607000  | 18.934634000 | 1 | 1.023970000  | -2.774318000 | 16.897113000 |
| 6 | 6.257584000 | 8.421343000  | 18.567806000 | 1 | 2.860517000  | -1.020639000 | 16.502073000 |
| 7 | 5.802555000 | 9.648637000  | 20.323319000 | 1 | 1.858276000  | -0.222521000 | 15.279305000 |
| 6 | 6.252987000 | 8.432170000  | 20.724251000 | 1 | 2.469789000  | 0.696292000  | 16.660144000 |
| 7 | 6.532029000 | 7.666919000  | 19.683117000 | 1 | -1.184960000 | -1.366588000 | 15.269539000 |
| 1 | 3.792534000 | 11.674553000 | 16.936210000 | 1 | 0.381668000  | -1.870628000 | 14.606432000 |
| 1 | 5.628457000 | 11.781904000 | 18.579665000 | 1 | -0.770807000 | -3.080663000 | 15.179015000 |
| 1 | 5.995385000 | 10.812714000 | 17.166125000 | 7 | 0.135314000  | 1.236887000  | 13.534108000 |
| 1 | 3.399951000 | 10.919509000 | 19.718794000 | 6 | 0.435704000  | 2.622901000  | 13.939422000 |
| 1 | 6.400517000 | 8.040326000  | 17.568384000 | 6 | -0.851998000 | 3.246476000  | 14.473279000 |
| 1 | 6.398586000 | 8.150705000  | 21.755703000 | 8 | -1.526210000 | 4.056842000  | 13.865022000 |
| 7 | 4.078700000 | 9.450277000  | 15.727114000 | 6 | 1.020207000  | 3.407226000  | 12.757265000 |
| 6 | 4.013384000 | 8.265845000  | 14.888897000 | 6 | 1.654337000  | 4.735723000  | 13.176878000 |
| 6 | 5.328119000 | 7.443060000  | 14.940818000 | 7 | 0.872000000  | 5.832004000  | 13.088658000 |
| 8 | 6.409043000 | 7.924938000  | 15.306957000 | 8 | 2.833020000  | 4.762875000  | 13.550306000 |
| 6 | 3.560304000 | 8.708590000  | 13.458363000 | 6 | -3.298975000 | 5.133380000  | 17.705540000 |
| 6 | 3.997156000 | 7.854740000  | 12.275013000 | 6 | -1.892971000 | 5.708097000  | 17.519509000 |
| 8 | 2.120287000 | 8.751667000  | 13.425902000 | 8 | -0.938751000 | 5.027597000  | 17.147044000 |
| 1 | 3.226597000 | 7.623804000  | 15.295303000 | 7 | -1.804522000 | 7.048043000  | 17.794194000 |
| 1 | 3.953625000 | 9.721061000  | 13.304247000 | 6 | -0.520542000 | 7.696713000  | 18.015224000 |
| 1 | 3.581543000 | 8.295176000  | 11.363030000 | 6 | -0.085323000 | 7.467475000  | 19.483730000 |
| 1 | 5.087668000 | 7.848231000  | 12.188798000 | 8 | -0.906665000 | 7.149344000  | 20.347119000 |
| 1 | 3.648850000 | 6.821942000  | 12.350815000 | 6 | -0.558653000 | 9.205151000  | 17.649148000 |
| 1 | 1.834411000 | 9.401993000  | 14.089083000 | 6 | -0.719243000 | 9.394771000  | 16.134580000 |
| 1 | 4.644641000 | 10.243908000 | 15.365684000 | 6 | -1.632672000 | 9.980958000  | 18.428735000 |
| 7 | 5.148825000 | 6.158588000  | 14.568347000 | 1 | 0.201392000  | 7.203965000  | 17.359048000 |
| 6 | 6.170987000 | 5.128109000  | 14.656777000 | 1 | 0.421459000  | 9.604872000  | 17.931548000 |
| 6 | 5.697773000 | 3.963335000  | 15.546736000 | 1 | -0.702498000 | 10.459839000 | 15.875555000 |
| 6 | 6.861539000 | 3.157021000  | 16.152701000 | 1 | 0.095205000  | 8.897900000  | 15.593035000 |
| 6 | 7.723382000 | 4.100850000  | 17.006879000 | 1 | -2.551084000 | 7.409452000  | 18.375627000 |
| 8 | 7.175525000 | 4.500130000  | 18.085395000 | 1 | -1.665561000 | 8.971116000  | 15.778359000 |
| 8 | 8.836519000 | 4.462845000  | 16.548605000 | 1 | -2.645347000 | 9.697755000  | 18.111529000 |
| 1 | 7.065135000 | 5.595228000  | 15.069351000 | 1 | -1.556413000 | 9.810600000  | 19.508467000 |
| 1 | 5.023560000 | 3.312719000  | 14.976454000 | 1 | -1.527608000 | 11.056179000 | 18.246837000 |
| 1 | 5.114516000 | 4.390113000  | 16.369374000 | 7 | 1.236903000  | 7.639395000  | 19.738938000 |
| 1 | 7.479851000 | 2.699290000  | 15.373149000 | 6 | 1.749828000  | 7.534759000  | 21.099854000 |
| 1 | 6.456270000 | 2.356081000  | 16.782269000 | 6 | 2.079621000  | 6.088734000  | 21.554413000 |
| 1 | 4.219470000 | 5.843695000  | 14.289724000 | 6 | 3.294995000  | 5.485476000  | 20.916754000 |
| 6 | 2.859494000 | 13.989621000 | 14.592507000 | 6 | 4.623397000  | 5.577652000  | 21.263350000 |
| 6 | 3.475352000 | 12.734455000 | 13.952464000 | 7 | 3.288328000  | 4.751097000  | 19.734021000 |
| 6 | 4.994167000 | 12.688373000 | 14.183008000 | 6 | 4.585523000  | 4.462199000  | 19.436871000 |
| 8 | 5.520221000 | 11.640536000 | 14.696908000 | 7 | 5.421872000  | 4.955569000  | 20.329869000 |
| 8 | 5.634022000 | 13.724687000 | 13.875956000 | 1 | 0.992564000  | 7.940540000  | 21.778434000 |
| 7 | 5.158606000 | 17.369523000 | 15.726879000 | 1 | 1.188349000  | 5.470532000  | 21.397180000 |
| 6 | 5.715729000 | 18.183065000 | 16.811760000 | 1 | 2.246441000  | 6.121942000  | 22.638646000 |
| 6 | 6.414810000 | 19.390054000 | 16.207881000 | 1 | 5.059785000  | 6.066897000  | 22.121863000 |
| 8 | 7.320737000 | 20.012166000 | 16.722499000 | 1 | 4.882363000  | 3.912416000  | 18.558221000 |
| 6 | 6.582174000 | 17.454856000 | 17.860107000 | 1 | 1.852224000  | 7.989441000  | 19.002086000 |
| 6 | 5.850214000 | 16.336735000 | 18.661239000 | 6 | 12.408525000 | -1.504755000 | 18.970109000 |
| 8 | 4.698295000 | 16.553213000 | 19.088407000 | 6 | 12.020355000 | -0.030863000 | 19.130832000 |
| 8 | 6.514829000 | 15.250025000 | 18.827964000 | 6 | 10.503010000 | 0.181864000  | 19.218994000 |
| 1 | 4.847284000 | 18.595975000 | 17.351848000 | 6 | 10.106974000 | 1.652660000  | 19.404716000 |
| 1 | 6.949298000 | 18.199141000 | 18.579074000 | 7 | 10.615427000 | 2.452249000  | 18.298386000 |
| 1 | 7.470244000 | 17.032582000 | 17.375231000 | 6 | 11.318452000 | 3.596647000  | 18.397461000 |
| 1 | 5.881420000 | 16.789538000 | 15.301234000 | 7 | 11.348438000 | 4.281952000  | 19.543833000 |
| 6 | 1.147661000 | -0.595785000 | 18.682526000 | 7 | 12.067350000 | 3.969482000  | 17.341124000 |
| 6 | 0.823430000 | -0.639549000 | 17.181950000 | 1 | 12.054247000 | -2.106036000 | 19.817126000 |
| 6 | 0.237404000 | -2.012343000 | 16.792885000 | 1 | 12.421957000 | 0.548307000  | 18.291229000 |
| 6 | 2.066825000 | -0.276591000 | 16.353426000 | 1 | 12.493429000 | 0.377901000  | 20.034889000 |



|    |              |              |              |                        |              |              |              |
|----|--------------|--------------|--------------|------------------------|--------------|--------------|--------------|
| 1  | 10.089269000 | -0.394550000 | 20.058265000 | 6                      | -3.519578000 | 3.819915000  | 16.957717000 |
| 1  | 10.023155000 | -0.214218000 | 18.310858000 | 1                      | -3.374419000 | 3.955023000  | 15.880969000 |
| 1  | 10.536750000 | 2.047226000  | 20.328571000 | 1                      | -2.811601000 | 3.060305000  | 17.302680000 |
| 1  | 9.019712000  | 1.763074000  | 19.491656000 | 1                      | -4.535209000 | 3.445767000  | 17.128102000 |
| 1  | 10.488346000 | 2.098793000  | 17.354462000 | 1                      | -4.037612000 | 5.883777000  | 17.396008000 |
| 1  | 11.903376000 | 5.151380000  | 19.571813000 | 1                      | -3.444379000 | 4.986821000  | 18.785809000 |
| 1  | 10.491139000 | 4.287799000  | 20.103243000 | 1                      | -0.124575000 | 5.720666000  | 12.956075000 |
| 1  | 11.863898000 | 3.439816000  | 16.496089000 | 1                      | 1.235723000  | 6.749208000  | 13.348076000 |
| 1  | 12.157516000 | 4.980242000  | 17.142782000 | 1                      | 1.813908000  | 2.802968000  | 12.312544000 |
| 26 | 7.705603000  | 5.762487000  | 19.690451000 | 1                      | 0.237372000  | 3.569648000  | 12.008322000 |
| 6  | 8.441354000  | 5.189170000  | 24.561353000 | 1                      | -1.205253000 | 2.832850000  | 15.437276000 |
| 6  | 8.961763000  | 4.419261000  | 23.347942000 | 1                      | -0.626207000 | 1.229160000  | 12.855209000 |
| 8  | 8.711806000  | 4.247881000  | 20.956875000 | 1                      | -0.170246000 | 0.683011000  | 14.332662000 |
| 6  | 8.442035000  | 4.924276000  | 22.008089000 | 1                      | 2.999435000  | 11.826032000 | 14.340764000 |
| 8  | 7.774483000  | 5.991512000  | 21.935032000 | 1                      | 3.304140000  | 12.756198000 | 12.867110000 |
| 1  | 7.349801000  | 5.128357000  | 24.624821000 | 1                      | 3.380269000  | 14.879063000 | 14.226977000 |
| 1  | 8.711534000  | 3.352902000  | 23.415221000 | 1                      | 1.795881000  | 14.078390000 | 14.339403000 |
| 1  | 10.059011000 | 4.462755000  | 23.302091000 | 1                      | 2.929206000  | 13.955012000 | 15.683732000 |
| 1  | 8.706929000  | 6.248248000  | 24.494067000 | 1                      | 4.466259000  | 16.730111000 | 16.112063000 |
| 7  | 9.313409000  | 7.293900000  | 16.540371000 | 1                      | 5.999289000  | 19.684614000 | 15.217119000 |
| 6  | 10.376240000 | 8.354570000  | 16.500537000 | 1                      | 5.451687000  | 10.390724000 | 20.935127000 |
| 6  | 11.710329000 | 7.599321000  | 16.812595000 | 7                      | 3.566021000  | 13.652305000 | 20.668279000 |
| 8  | 11.787748000 | 6.468304000  | 16.265146000 | 6                      | 2.296203000  | 13.101586000 | 20.197588000 |
| 6  | 10.048395000 | 9.475099000  | 17.480952000 | 6                      | 2.444861000  | 12.454786000 | 18.809078000 |
| 6  | 8.882370000  | 10.382287000 | 17.064074000 | 8                      | 2.079611000  | 13.029475000 | 17.792938000 |
| 6  | 9.260059000  | 11.451444000 | 16.025865000 | 1                      | 3.873359000  | 14.551512000 | 20.282242000 |
| 7  | 8.182321000  | 12.394289000 | 15.749126000 | 1                      | 1.948521000  | 12.375900000 | 20.938465000 |
| 6  | 7.889181000  | 13.434474000 | 16.548206000 | 1                      | 1.571982000  | 13.912865000 | 20.108008000 |
| 7  | 8.589997000  | 13.713780000 | 17.677005000 | 6                      | 6.762071000  | 12.762870000 | 22.457483000 |
| 7  | 6.919850000  | 14.273364000 | 16.200851000 | 1                      | 6.354118000  | 12.234645000 | 23.325084000 |
| 8  | 12.549193000 | 8.162870000  | 17.556466000 | 1                      | 7.144395000  | 12.009764000 | 21.759900000 |
| 1  | 9.140056000  | 7.027889000  | 17.529052000 | 1                      | 7.613187000  | 13.366494000 | 22.789517000 |
| 1  | 10.431633000 | 8.717348000  | 15.466094000 | 1                      | 11.973213000 | -1.932076000 | 18.057791000 |
| 1  | 10.958017000 | 10.064407000 | 17.628635000 | 1                      | 13.496214000 | -1.626358000 | 18.907476000 |
| 1  | 9.829533000  | 9.014443000  | 18.449494000 | 6                      | 14.167795000 | 8.592011000  | 21.638663000 |
| 1  | 9.699664000  | 6.435327000  | 16.122063000 | 1                      | 14.264281000 | 7.885716000  | 22.474391000 |
| 1  | 8.494951000  | 10.879499000 | 17.961966000 | 1                      | 14.753788000 | 8.202306000  | 20.800555000 |
| 1  | 8.041386000  | 9.799300000  | 16.670573000 | 1                      | 14.603860000 | 9.547990000  | 21.957822000 |
| 1  | 9.534386000  | 10.987443000 | 15.072672000 | 1                      | 13.142806000 | 10.566069000 | 20.321599000 |
| 1  | 10.138108000 | 12.018038000 | 16.359526000 | 1                      | 8.428886000  | 7.544856000  | 16.078567000 |
| 1  | 7.400676000  | 12.097889000 | 15.142555000 | 1                      | 1.173564000  | 2.571987000  | 14.748886000 |
| 1  | 8.122869000  | 14.416617000 | 18.270290000 | 6                      | 2.130890000  | 4.294230000  | 18.978876000 |
| 1  | 9.039996000  | 12.948920000 | 18.158896000 | 1                      | 2.485995000  | 3.752369000  | 18.099443000 |
| 1  | 6.433925000  | 14.136468000 | 15.292924000 | 1                      | 1.514626000  | 3.618725000  | 19.582734000 |
| 1  | 6.520585000  | 14.807669000 | 16.975139000 | 1                      | 1.513481000  | 5.129989000  | 18.646687000 |
| 8  | 10.285480000 | 2.550119000  | 15.373192000 | WT VioC Fe(IV) complex |              |              |              |
| 1  | 9.717323000  | 3.317516000  | 15.668759000 | 6                      | 5.699545000  | 13.666189000 | 21.817158000 |
| 1  | 10.554293000 | 2.755601000  | 14.465977000 | 6                      | 4.452424000  | 12.908361000 | 21.379231000 |
| 8  | 9.086332000  | 6.591223000  | 19.056777000 | 8                      | 4.280517000  | 11.687117000 | 21.589482000 |
| 7  | 12.490906000 | 9.795034000  | 20.181679000 | 8                      | 4.280517000  | 11.687117000 | 21.589482000 |
| 6  | 12.697794000 | 8.777300000  | 21.225980000 | 1                      | 6.131916000  | 14.133166000 | 20.918638000 |
| 6  | 12.066325000 | 7.443471000  | 20.796029000 | 1                      | 5.376963000  | 14.500649000 | 22.453163000 |
| 8  | 12.853913000 | 6.713123000  | 19.849221000 | 7                      | 3.156039000  | 11.291744000 | 18.820455000 |
| 1  | 12.690516000 | 9.402295000  | 19.260375000 | 6                      | 4.003475000  | 10.972977000 | 17.684514000 |
| 1  | 12.133653000 | 9.104760000  | 22.114546000 | 6                      | 3.698102000  | 9.619081000  | 17.004928000 |
| 1  | 11.052333000 | 7.608794000  | 20.410287000 | 8                      | 2.993417000  | 8.737426000  | 17.510375000 |
| 1  | 11.991182000 | 6.794553000  | 21.677451000 | 6                      | 5.507464000  | 11.052875000 | 18.079173000 |
| 1  | 12.838598000 | 7.197085000  | 18.985548000 | 6                      | 5.991752000  | 9.891321000  | 18.890401000 |
| 1  | 1.532103000  | 0.387244000  | 18.978601000 | 6                      | 6.493057000  | 8.683150000  | 18.472287000 |
| 1  | 0.259678000  | -0.806675000 | 19.290529000 | 7                      | 5.975679000  | 9.817294000  | 20.274990000 |
| 1  | 8.862045000  | 4.783982000  | 25.489348000 | 6                      | 6.454164000  | 8.609945000  | 20.644901000 |
| 1  | 6.425762000  | 4.764728000  | 13.651842000 | 7                      | 6.770395000  | 7.899329000  | 19.569688000 |
| 1  | 2.649249000  | 8.153914000  | 21.168732000 | 1                      | 3.824770000  | 11.759808000 | 16.948142000 |

|   |              |              |              |    |              |              |              |
|---|--------------|--------------|--------------|----|--------------|--------------|--------------|
| 1 | 5.670874000  | 12.005712000 | 18.596687000 | 1  | 1.462820000  | 2.171870000  | 22.469090000 |
| 1 | 6.086999000  | 11.101630000 | 17.154851000 | 7  | -0.259199000 | 1.537268000  | 14.650420000 |
| 1 | 3.480864000  | 10.999139000 | 19.738161000 | 6  | 0.435712000  | 2.622882000  | 13.939413000 |
| 1 | 6.633980000  | 8.338996000  | 17.459239000 | 6  | 0.205961000  | 2.402836000  | 12.450049000 |
| 1 | 6.582732000  | 8.284878000  | 21.664236000 | 8  | 1.060115000  | 2.106265000  | 11.634235000 |
| 7 | 4.324132000  | 9.502693000  | 15.807759000 | 6  | 1.912659000  | 2.644733000  | 14.364216000 |
| 6 | 4.232545000  | 8.341075000  | 14.945427000 | 6  | 2.664051000  | 3.874142000  | 13.876615000 |
| 6 | 5.549380000  | 7.528102000  | 14.945509000 | 7  | 3.132708000  | 3.833937000  | 12.611020000 |
| 8 | 6.654408000  | 8.027485000  | 15.216208000 | 8  | 2.852376000  | 4.851159000  | 14.620977000 |
| 6 | 3.810529000  | 8.834517000  | 13.519823000 | 6  | -3.125009000 | 4.999446000  | 17.287452000 |
| 6 | 3.741033000  | 7.758146000  | 12.441525000 | 6  | -1.806742000 | 5.758453000  | 17.140116000 |
| 8 | 2.501999000  | 9.382201000  | 13.595197000 | 8  | -0.881748000 | 5.322462000  | 16.440059000 |
| 1 | 3.427962000  | 7.704864000  | 15.326395000 | 7  | -1.745671000 | 6.929765000  | 17.823588000 |
| 1 | 4.534550000  | 9.605305000  | 13.217846000 | 6  | -0.520509000 | 7.696650000  | 18.015254000 |
| 1 | 3.367055000  | 8.216070000  | 11.521289000 | 6  | -0.078448000 | 7.531812000  | 19.481905000 |
| 1 | 4.721164000  | 7.317042000  | 12.239637000 | 8  | -0.873186000 | 7.160511000  | 20.348690000 |
| 1 | 3.036410000  | 6.972661000  | 12.739309000 | 6  | -0.671106000 | 9.190176000  | 17.608820000 |
| 1 | 2.550278000  | 10.204655000 | 14.107050000 | 6  | -0.819434000 | 9.331329000  | 16.087519000 |
| 1 | 4.856096000  | 10.316131000 | 15.431264000 | 6  | -1.817571000 | 9.885818000  | 18.358119000 |
| 7 | 5.372584000  | 6.233683000  | 14.603244000 | 1  | 0.240608000  | 7.245240000  | 17.373112000 |
| 6 | 6.431180000  | 5.237056000  | 14.536845000 | 1  | 0.271057000  | 9.673006000  | 17.897381000 |
| 6 | 6.049461000  | 3.957250000  | 15.317917000 | 1  | -0.935551000 | 10.386017000 | 15.813192000 |
| 6 | 7.227904000  | 3.324192000  | 16.081064000 | 1  | 0.060496000  | 8.944180000  | 15.560335000 |
| 6 | 7.920627000  | 4.379160000  | 16.946573000 | 1  | -2.430835000 | 7.060346000  | 18.559762000 |
| 8 | 7.185032000  | 4.842210000  | 17.904009000 | 1  | -1.702391000 | 8.791892000  | 15.724056000 |
| 8 | 9.064361000  | 4.764203000  | 16.646230000 | 1  | -2.792407000 | 9.487604000  | 18.049281000 |
| 1 | 7.328380000  | 5.701292000  | 14.947717000 | 1  | -1.731958000 | 9.765456000  | 19.444099000 |
| 1 | 5.619183000  | 3.213442000  | 14.637435000 | 1  | -1.818703000 | 10.958336000 | 18.136197000 |
| 1 | 5.264359000  | 4.214640000  | 16.033412000 | 7  | 1.223509000  | 7.819305000  | 19.735432000 |
| 1 | 7.965425000  | 2.897667000  | 15.395578000 | 6  | 1.751088000  | 7.716851000  | 21.087853000 |
| 1 | 6.848616000  | 2.518977000  | 16.720504000 | 6  | 2.218051000  | 6.286378000  | 21.460283000 |
| 1 | 4.416743000  | 5.892210000  | 14.499341000 | 6  | 3.424167000  | 5.828000000  | 20.702450000 |
| 6 | 2.859472000  | 13.989591000 | 14.592505000 | 6  | 4.755911000  | 5.855931000  | 21.040759000 |
| 6 | 3.487470000  | 12.659779000 | 14.160646000 | 7  | 3.393891000  | 5.360486000  | 19.397692000 |
| 6 | 5.024775000  | 12.698140000 | 14.217241000 | 6  | 4.658146000  | 5.141892000  | 19.001035000 |
| 8 | 5.652675000  | 11.692539000 | 14.709468000 | 7  | 5.523225000  | 5.436377000  | 19.968565000 |
| 8 | 5.580747000  | 13.738353000 | 13.797309000 | 1  | 0.961917000  | 8.012835000  | 21.784768000 |
| 7 | 5.435459000  | 17.407597000 | 15.602527000 | 1  | 1.375127000  | 5.601287000  | 21.316087000 |
| 6 | 5.715740000  | 18.183079000 | 16.811768000 | 1  | 2.457981000  | 6.274308000  | 22.530162000 |
| 6 | 6.371592000  | 19.494315000 | 16.394621000 | 1  | 5.214019000  | 6.150913000  | 21.971410000 |
| 8 | 7.159109000  | 20.130606000 | 17.061280000 | 1  | 4.932913000  | 4.789072000  | 18.023716000 |
| 6 | 6.496438000  | 17.488177000 | 17.954851000 | 1  | 1.829596000  | 8.169329000  | 18.990757000 |
| 6 | 5.802624000  | 16.278638000 | 18.651117000 | 6  | 12.376451000 | -1.515263000 | 18.996008000 |
| 8 | 4.673427000  | 16.430518000 | 19.156520000 | 6  | 12.020366000 | -0.030851000 | 19.130839000 |
| 8 | 6.480703000  | 15.182481000 | 18.674019000 | 6  | 10.511221000 | 0.230078000  | 19.046255000 |
| 1 | 4.735006000  | 18.475972000 | 17.222352000 | 6  | 10.145055000 | 1.709655000  | 19.206882000 |
| 1 | 6.689207000  | 18.245123000 | 18.725320000 | 7  | 10.768546000 | 2.505579000  | 18.153936000 |
| 1 | 7.476591000  | 17.173426000 | 17.577244000 | 6  | 11.430540000 | 3.663579000  | 18.321966000 |
| 1 | 6.269377000  | 16.919130000 | 15.280510000 | 7  | 11.317246000 | 4.356543000  | 19.460377000 |
| 6 | 1.147661000  | -0.595645000 | 18.682515000 | 7  | 12.277624000 | 4.072546000  | 17.358690000 |
| 6 | 1.136402000  | 0.848666000  | 19.207248000 | 1  | 11.906731000 | -2.111779000 | 19.787749000 |
| 6 | 1.204094000  | 0.859519000  | 20.747613000 | 1  | 12.536424000 | 0.542383000  | 18.351170000 |
| 6 | -0.081047000 | 1.612255000  | 18.663205000 | 1  | 12.397445000 | 0.352491000  | 20.089466000 |
| 6 | 1.351235000  | 2.247904000  | 21.381220000 | 1  | 9.986101000  | -0.337120000 | 19.826603000 |
| 1 | 0.263779000  | -1.146074000 | 19.031680000 | 1  | 10.122115000 | -0.141561000 | 18.086206000 |
| 1 | 2.039625000  | 1.353849000  | 18.830162000 | 1  | 10.512115000 | 2.084108000  | 20.166445000 |
| 1 | 2.051668000  | 0.234735000  | 21.063725000 | 1  | 9.057004000  | 1.850490000  | 19.201898000 |
| 1 | 0.302297000  | 0.369877000  | 21.145395000 | 1  | 10.723455000 | 2.159786000  | 17.199460000 |
| 1 | -1.014292000 | 1.187901000  | 19.059484000 | 1  | 11.885422000 | 5.215752000  | 19.558171000 |
| 1 | -0.048850000 | 2.673012000  | 18.932278000 | 1  | 10.413385000 | 4.343604000  | 19.929083000 |
| 1 | -0.120549000 | 1.555304000  | 17.569121000 | 1  | 12.221961000 | 3.528035000  | 16.503075000 |
| 1 | 2.235389000  | 2.768468000  | 20.991806000 | 1  | 12.318678000 | 5.086904000  | 17.163633000 |
| 1 | 0.478413000  | 2.880830000  | 21.185259000 | 26 | 7.506990000  | 5.960791000  | 19.521939000 |

|   |              |              |              |                         |              |              |              |              |
|---|--------------|--------------|--------------|-------------------------|--------------|--------------|--------------|--------------|
| 6 | 8.349782000  | 5.059233000  | 24.308882000 | 1                       | 2.780556000  | 3.114556000  | 11.985725000 |              |
| 6 | 8.789394000  | 4.369163000  | 23.017333000 | 1                       | 3.510878000  | 4.683126000  | 12.209791000 |              |
| 8 | 8.416102000  | 4.412096000  | 20.631448000 | 1                       | 1.933137000  | 2.659966000  | 15.455447000 |              |
| 6 | 8.272647000  | 5.023381000  | 21.751510000 | 1                       | 2.410506000  | 1.736110000  | 14.006247000 |              |
| 8 | 7.721710000  | 6.156337000  | 21.761198000 | 1                       | -0.863701000 | 2.428347000  | 12.150931000 |              |
| 1 | 7.259556000  | 5.050966000  | 24.408905000 | 1                       | -0.017619000 | 0.622982000  | 14.271381000 |              |
| 1 | 8.475645000  | 3.318568000  | 22.994997000 | 1                       | -1.269792000 | 1.644151000  | 14.609693000 |              |
| 1 | 9.885695000  | 4.353049000  | 22.939265000 | 1                       | 3.114184000  | 11.853968000 | 14.804386000 |              |
| 1 | 8.678476000  | 6.102137000  | 24.328778000 | 1                       | 3.192822000  | 12.421553000 | 13.128794000 |              |
| 7 | 9.398559000  | 7.565185000  | 16.371793000 | 1                       | 3.276453000  | 14.805281000 | 13.996147000 |              |
| 6 | 10.521629000 | 8.572431000  | 16.381341000 | 1                       | 1.772041000  | 13.972214000 | 14.458736000 |              |
| 6 | 11.777130000 | 7.730288000  | 16.799215000 | 1                       | 3.050367000  | 14.188364000 | 15.651572000 |              |
| 8 | 11.783298000 | 6.569587000  | 16.308327000 | 1                       | 4.730442000  | 16.698045000 | 15.786767000 |              |
| 6 | 10.219402000 | 9.741595000  | 17.307517000 | 1                       | 6.046489000  | 19.841130000 | 15.388242000 |              |
| 6 | 9.046597000  | 10.637195000 | 16.879373000 | 1                       | 5.564363000  | 10.518860000 | 20.907423000 |              |
| 6 | 9.417838000  | 11.703941000 | 15.833889000 | 7                       | 3.554270000  | 13.661767000 | 20.701848000 |              |
| 7 | 8.327044000  | 12.622931000 | 15.544478000 | 6                       | 2.290421000  | 13.118461000 | 20.204837000 |              |
| 6 | 7.989718000  | 13.642291000 | 16.359559000 | 6                       | 2.472006000  | 12.490073000 | 18.813782000 |              |
| 7 | 8.671711000  | 13.939291000 | 17.492739000 | 8                       | 2.100316000  | 13.049114000 | 17.793348000 |              |
| 7 | 6.984989000  | 14.441068000 | 16.020670000 | 1                       | 3.858611000  | 14.572878000 | 20.332527000 |              |
| 8 | 12.604876000 | 8.258946000  | 17.573523000 | 1                       | 1.926856000  | 12.382674000 | 20.928131000 |              |
| 1 | 9.124107000  | 7.324233000  | 17.344796000 | 1                       | 1.569800000  | 13.932180000 | 20.114792000 |              |
| 1 | 10.649012000 | 8.895799000  | 15.341630000 | 6                       | 6.724989000  | 12.804975000 | 22.553427000 |              |
| 1 | 11.139604000 | 10.329355000 | 17.384179000 | 1                       | 6.281424000  | 12.306923000 | 23.421417000 |              |
| 1 | 10.051632000 | 9.352576000  | 18.317900000 | 1                       | 7.148262000  | 12.031156000 | 21.903334000 |              |
| 1 | 9.811603000  | 6.682625000  | 16.021297000 | 1                       | 7.554674000  | 13.428226000 | 22.902071000 |              |
| 1 | 8.654040000  | 11.138552000 | 17.771646000 | 1                       | 12.038690000 | -1.918899000 | 18.033364000 |              |
| 1 | 8.208473000  | 10.049205000 | 16.486281000 | 1                       | 13.459028000 | -1.670759000 | 19.059921000 |              |
| 1 | 9.708115000  | 11.236374000 | 14.886921000 | 6                       | 14.209754000 | 8.670066000  | 21.497423000 |              |
| 1 | 10.285275000 | 12.285470000 | 16.169374000 | 1                       | 14.426865000 | 7.948651000  | 22.295837000 |              |
| 1 | 7.541700000  | 12.284284000 | 14.966179000 | 1                       | 14.742658000 | 8.344429000  | 20.598640000 |              |
| 1 | 8.140857000  | 14.576925000 | 18.112546000 | 1                       | 14.612155000 | 9.642683000  | 21.806282000 |              |
| 1 | 9.188480000  | 13.201842000 | 17.948294000 | 1                       | 12.808798000 | 10.659407000 | 20.433513000 |              |
| 1 | 6.474570000  | 14.260459000 | 15.136089000 | 1                       | 8.546926000  | 7.816000000  | 15.841618000 |              |
| 1 | 6.551198000  | 14.924078000 | 16.813763000 | 1                       | -0.046773000 | 3.558630000  | 14.250817000 |              |
| 8 | 1.719779000  | 4.683407000  | 17.260969000 |                         |              |              |              |              |
| 8 | 10.534490000 | 2.858319000  | 15.273220000 |                         |              |              |              |              |
| 1 | 10.044607000 | 3.643954000  | 15.621012000 | VioC WT Fe(III) complex | 6            | 5.716307000  | 13.629552000 | 21.827321000 |
| 1 | 10.812189000 | 3.090221000  | 14.374666000 | 6                       | 4.452426000  | 12.908362000 | 21.379236000 |              |
| 1 | 2.174111000  | 4.858035000  | 16.411889000 | 8                       | 4.239184000  | 11.697061000 | 21.585774000 |              |
| 1 | 0.784236000  | 4.911531000  | 17.069893000 | 1                       | 6.102575000  | 14.202564000 | 20.969403000 |              |
| 8 | 8.948561000  | 6.561894000  | 19.047469000 | 1                       | 5.418303000  | 14.379787000 | 22.573051000 |              |
| 7 | 12.325013000 | 9.786468000  | 20.224664000 | 7                       | 3.135077000  | 11.370158000 | 18.800629000 |              |
| 6 | 12.699514000 | 8.774738000  | 21.226964000 | 6                       | 3.976297000  | 11.043923000 | 17.660039000 |              |
| 6 | 12.097486000 | 7.417249000  | 20.844131000 | 6                       | 3.589842000  | 9.747331000  | 16.922423000 |              |
| 8 | 12.823776000 | 6.716785000  | 19.831277000 | 8                       | 2.859630000  | 8.871491000  | 17.398594000 |              |
| 1 | 12.638859000 | 9.493714000  | 19.297962000 | 6                       | 5.472184000  | 10.985478000 | 18.085069000 |              |
| 1 | 12.201681000 | 9.066333000  | 22.164680000 | 6                       | 5.870744000  | 9.777141000  | 18.874812000 |              |
| 1 | 11.048660000 | 7.562842000  | 20.547823000 | 6                       | 6.359408000  | 8.566876000  | 18.446204000 |              |
| 1 | 12.119070000 | 6.759430000  | 21.721231000 | 7                       | 5.826206000  | 9.672559000  | 20.258537000 |              |
| 1 | 12.839509000 | 7.253652000  | 18.999815000 | 6                       | 6.283147000  | 8.439180000  | 20.596813000 |              |
| 1 | 1.139874000  | -0.619306000 | 17.585933000 | 7                       | 6.610272000  | 7.746890000  | 19.519816000 |              |
| 1 | 2.034891000  | -1.141628000 | 19.026375000 | 1                       | 3.874806000  | 11.869272000 | 16.950913000 |              |
| 1 | 8.774886000  | 4.546359000  | 25.177847000 | 1                       | 5.695021000  | 11.910802000 | 18.629911000 |              |
| 1 | 6.654314000  | 4.993296000  | 13.488795000 | 1                       | 6.069293000  | 11.015391000 | 17.171297000 |              |
| 1 | 2.584514000  | 8.419579000  | 21.184668000 | 1                       | 3.449991000  | 11.043751000 | 19.710054000 |              |
| 1 | 2.589593000  | 5.211262000  | 18.763467000 | 1                       | 6.538752000  | 8.250717000  | 17.430202000 |              |
| 6 | -3.291529000 | 3.883108000  | 16.257070000 | 1                       | 6.392186000  | 8.091127000  | 21.612274000 |              |
| 1 | -3.308222000 | 4.287609000  | 15.239415000 | 7                       | 4.170112000  | 9.667363000  | 15.696453000 |              |
| 1 | -2.462186000 | 3.172746000  | 16.326718000 | 6                       | 4.087419000  | 8.499662000  | 14.837673000 |              |
| 1 | -4.229238000 | 3.344027000  | 16.427171000 | 6                       | 5.433396000  | 7.730406000  | 14.804404000 |              |
| 1 | -3.958780000 | 5.710428000  | 17.232972000 | 8                       | 6.515399000  | 8.258059000  | 15.085543000 |              |
| 1 | -3.147844000 | 4.580144000  | 18.303572000 | 6                       | 3.596083000  | 8.988602000  | 13.441315000 |              |

|   |              |              |              |    |              |              |              |
|---|--------------|--------------|--------------|----|--------------|--------------|--------------|
| 6 | 3.442861000  | 7.911414000  | 12.374276000 | 6  | -1.846070000 | 5.786640000  | 17.131961000 |
| 8 | 2.304542000  | 9.569845000  | 13.594559000 | 8  | -0.985033000 | 5.413550000  | 16.323903000 |
| 1 | 3.317216000  | 7.842953000  | 15.253481000 | 7  | -1.748841000 | 6.919804000  | 17.873289000 |
| 1 | 4.313378000  | 9.747813000  | 13.092941000 | 6  | -0.520517000 | 7.696652000  | 18.015251000 |
| 1 | 3.004121000  | 8.366253000  | 11.480620000 | 6  | -0.024142000 | 7.509061000  | 19.463558000 |
| 1 | 4.408743000  | 7.473200000  | 12.106960000 | 8  | -0.807518000 | 7.162184000  | 20.355123000 |
| 1 | 2.766420000  | 7.124055000  | 12.725862000 | 6  | -0.699828000 | 9.194316000  | 17.642065000 |
| 1 | 2.369691000  | 10.208585000 | 14.324260000 | 6  | -0.917493000 | 9.358531000  | 16.131507000 |
| 1 | 4.750705000  | 10.458015000 | 15.355225000 | 6  | -1.817296000 | 9.868208000  | 18.452288000 |
| 7 | 5.301642000  | 6.433516000  | 14.431412000 | 1  | 0.217371000  | 7.262104000  | 17.335949000 |
| 6 | 6.400791000  | 5.475328000  | 14.446921000 | 1  | 0.251799000  | 9.677582000  | 17.895797000 |
| 6 | 5.987141000  | 4.162643000  | 15.137017000 | 1  | -1.050536000 | 10.416765000 | 15.878227000 |
| 6 | 7.175207000  | 3.382846000  | 15.726242000 | 1  | -0.060566000 | 8.983748000  | 15.559859000 |
| 6 | 7.965762000  | 4.288552000  | 16.686601000 | 1  | -2.346427000 | 6.978661000  | 18.692267000 |
| 8 | 7.332463000  | 4.660625000  | 17.725388000 | 1  | -1.813261000 | 8.818997000  | 15.799742000 |
| 8 | 9.122872000  | 4.638493000  | 16.340573000 | 1  | -2.800538000 | 9.461340000  | 18.183052000 |
| 1 | 7.227491000  | 5.949205000  | 14.977080000 | 1  | -1.680193000 | 9.732303000  | 19.530902000 |
| 1 | 5.437216000  | 3.526047000  | 14.431944000 | 1  | -1.838946000 | 10.943871000 | 18.245628000 |
| 1 | 5.298409000  | 4.411109000  | 15.949046000 | 7  | 1.291478000  | 7.744320000  | 19.668012000 |
| 1 | 7.843854000  | 3.018958000  | 14.939375000 | 6  | 1.877117000  | 7.609674000  | 20.996942000 |
| 1 | 6.790787000  | 2.514580000  | 16.274722000 | 6  | 2.263123000  | 6.154557000  | 21.363265000 |
| 1 | 4.360371000  | 6.054339000  | 14.350169000 | 6  | 3.447405000  | 5.609445000  | 20.626420000 |
| 6 | 2.859477000  | 13.989573000 | 14.592505000 | 6  | 4.768387000  | 5.509473000  | 21.001871000 |
| 6 | 3.676718000  | 12.995814000 | 13.746847000 | 7  | 3.417248000  | 5.153603000  | 19.317151000 |
| 6 | 5.139684000  | 12.973275000 | 14.204447000 | 6  | 4.685261000  | 4.823227000  | 18.971824000 |
| 8 | 5.628963000  | 11.910179000 | 14.721761000 | 7  | 5.537882000  | 5.032434000  | 19.961563000 |
| 8 | 5.768224000  | 14.056214000 | 14.075146000 | 1  | 1.145212000  | 7.969441000  | 21.726790000 |
| 7 | 5.014621000  | 17.315468000 | 15.860799000 | 1  | 1.376509000  | 5.523873000  | 21.225300000 |
| 6 | 5.715741000  | 18.183082000 | 16.811769000 | 1  | 2.496137000  | 6.135654000  | 22.435235000 |
| 6 | 6.434848000  | 19.277969000 | 16.044026000 | 1  | 5.222274000  | 5.767521000  | 21.947760000 |
| 8 | 7.419395000  | 19.877548000 | 16.424223000 | 1  | 4.963540000  | 4.447873000  | 18.001749000 |
| 6 | 6.615472000  | 17.497435000 | 17.861789000 | 1  | 1.872500000  | 8.095640000  | 18.904474000 |
| 6 | 5.898521000  | 16.439802000 | 18.754975000 | 6  | 12.364505000 | -1.520337000 | 19.023993000 |
| 8 | 4.731339000  | 16.656313000 | 19.138441000 | 6  | 12.020364000 | -0.030846000 | 19.130837000 |
| 8 | 6.591814000  | 15.392275000 | 19.027345000 | 6  | 10.525892000 | 0.254624000  | 18.931581000 |
| 1 | 4.920128000  | 18.704577000 | 17.370384000 | 6  | 10.169731000 | 1.742608000  | 19.042016000 |
| 1 | 7.032071000  | 18.270420000 | 18.521469000 | 7  | 10.865215000 | 2.510450000  | 18.017193000 |
| 1 | 7.473860000  | 17.029927000 | 17.366132000 | 6  | 11.522984000 | 3.672369000  | 18.195455000 |
| 1 | 5.657182000  | 16.677715000 | 15.390896000 | 7  | 11.450489000 | 4.338770000  | 19.348374000 |
| 6 | 1.147663000  | -0.595646000 | 18.682516000 | 7  | 12.346146000 | 4.085635000  | 17.207521000 |
| 6 | 1.158732000  | 0.828802000  | 19.259573000 | 1  | 11.826015000 | -2.109729000 | 19.777074000 |
| 6 | 1.194046000  | 0.782758000  | 20.800369000 | 1  | 12.599212000 | 0.535471000  | 18.391512000 |
| 6 | -0.028310000 | 1.640315000  | 18.717771000 | 1  | 12.329851000 | 0.348819000  | 20.114809000 |
| 6 | 1.346158000  | 2.144905000  | 21.487667000 | 1  | 9.935343000  | -0.294107000 | 19.678537000 |
| 1 | 0.244221000  | -1.137736000 | 18.994398000 | 1  | 10.205754000 | -0.126687000 | 17.949700000 |
| 1 | 2.080910000  | 1.324776000  | 18.920444000 | 1  | 10.468643000 | 2.131379000  | 20.017615000 |
| 1 | 2.027654000  | 0.135574000  | 21.108761000 | 1  | 9.086537000  | 1.895801000  | 18.965955000 |
| 1 | 0.277786000  | 0.289493000  | 21.161048000 | 1  | 10.780545000 | 2.205951000  | 17.051100000 |
| 1 | -0.980543000 | 1.219678000  | 19.072239000 | 1  | 11.998903000 | 5.208305000  | 19.438253000 |
| 1 | 0.018995000  | 2.687400000  | 19.033465000 | 1  | 10.562828000 | 4.316142000  | 19.858631000 |
| 1 | -0.038715000 | 1.630847000  | 17.621615000 | 1  | 12.211671000 | 3.573243000  | 16.339681000 |
| 1 | 2.238568000  | 2.673567000  | 21.131584000 | 1  | 12.401051000 | 5.103623000  | 17.032594000 |
| 1 | 0.481397000  | 2.792890000  | 21.305661000 | 26 | 7.779156000  | 5.827837000  | 19.455152000 |
| 1 | 1.442441000  | 2.025775000  | 22.573343000 | 6  | 8.508964000  | 5.024990000  | 24.298313000 |
| 7 | -0.173710000 | 1.509171000  | 14.686876000 | 6  | 9.026102000  | 4.306834000  | 23.052234000 |
| 6 | 0.435713000  | 2.622890000  | 13.939414000 | 8  | 8.785768000  | 4.245989000  | 20.654948000 |
| 6 | 0.143678000  | 2.375791000  | 12.466239000 | 6  | 8.508040000  | 4.871014000  | 21.735265000 |
| 8 | 0.963494000  | 2.086618000  | 11.613369000 | 8  | 7.834097000  | 5.936287000  | 21.709890000 |
| 6 | 1.926739000  | 2.722831000  | 14.292904000 | 1  | 7.417450000  | 4.963363000  | 24.361329000 |
| 6 | 2.593019000  | 3.980860000  | 13.750413000 | 1  | 8.771835000  | 3.239443000  | 23.073617000 |
| 7 | 3.026168000  | 3.928950000  | 12.470773000 | 1  | 10.123492000 | 4.348099000  | 23.007688000 |
| 8 | 2.746492000  | 4.987129000  | 14.457942000 | 1  | 8.776234000  | 6.085546000  | 24.276176000 |
| 6 | -3.133275000 | 4.989390000  | 17.355088000 | 7  | 9.518677000  | 7.477790000  | 16.437225000 |

|   |              |              |              |   |              |              |              |
|---|--------------|--------------|--------------|---|--------------|--------------|--------------|
| 6 | 10.601678000 | 8.518245000  | 16.457966000 | 1 | 1.833776000  | 14.072483000 | 14.211680000 |
| 6 | 11.916362000 | 7.727450000  | 16.765644000 | 1 | 2.793148000  | 13.684483000 | 15.640706000 |
| 8 | 11.982078000 | 6.611258000  | 16.187209000 | 1 | 4.358620000  | 16.734918000 | 16.380118000 |
| 6 | 10.275988000 | 9.602142000  | 17.479461000 | 1 | 5.955332000  | 19.513741000 | 15.066445000 |
| 6 | 9.081269000  | 10.498226000 | 17.125940000 | 1 | 5.454656000  | 10.377281000 | 20.901076000 |
| 6 | 9.403375000  | 11.613158000 | 16.118707000 | 7 | 3.561379000  | 13.693420000 | 20.721603000 |
| 7 | 8.291351000  | 12.529325000 | 15.903719000 | 6 | 2.289247000  | 13.171468000 | 20.225237000 |
| 6 | 7.977469000  | 13.526956000 | 16.749497000 | 6 | 2.455946000  | 12.564409000 | 18.822099000 |
| 7 | 8.689607000  | 13.787074000 | 17.878292000 | 8 | 2.072448000  | 13.151087000 | 17.819752000 |
| 7 | 6.972957000  | 14.334431000 | 16.453067000 | 1 | 3.875447000  | 14.603355000 | 20.370571000 |
| 8 | 12.752706000 | 8.253405000  | 17.539586000 | 1 | 1.926460000  | 12.427298000 | 20.940274000 |
| 1 | 9.305482000  | 7.188018000  | 17.412268000 | 1 | 1.574316000  | 13.992189000 | 20.152011000 |
| 1 | 10.682037000 | 8.922163000  | 15.440521000 | 6 | 6.780138000  | 12.700202000 | 22.410767000 |
| 1 | 11.176629000 | 10.205880000 | 17.622696000 | 1 | 6.386567000  | 12.114954000 | 23.248018000 |
| 1 | 10.090688000 | 9.109605000  | 18.438405000 | 1 | 7.156618000  | 11.995934000 | 21.660949000 |
| 1 | 9.898006000  | 6.620165000  | 16.007833000 | 1 | 7.633035000  | 13.285404000 | 22.770093000 |
| 1 | 8.708487000  | 10.952402000 | 18.052457000 | 1 | 12.094363000 | -1.919931000 | 18.038192000 |
| 1 | 8.238937000  | 9.914422000  | 16.737326000 | 1 | 13.437076000 | -1.693861000 | 19.170106000 |
| 1 | 9.668701000  | 11.192053000 | 15.143187000 | 6 | 14.144732000 | 8.582886000  | 21.717808000 |
| 1 | 10.271495000 | 12.194058000 | 16.454283000 | 1 | 14.196275000 | 7.857656000  | 22.541177000 |
| 1 | 7.515569000  | 12.255027000 | 15.280219000 | 1 | 14.778492000 | 8.213916000  | 20.905408000 |
| 1 | 8.234434000  | 14.483965000 | 18.483545000 | 1 | 14.558994000 | 9.532068000  | 22.082936000 |
| 1 | 9.154914000  | 13.020305000 | 18.342021000 | 1 | 13.185435000 | 10.588410000 | 20.398021000 |
| 1 | 6.514861000  | 14.268046000 | 15.517649000 | 1 | 8.658077000  | 7.766705000  | 15.956778000 |
| 1 | 6.600234000  | 14.869425000 | 17.240034000 | 1 | -0.077824000 | 3.536376000  | 14.266843000 |
| 8 | 1.652310000  | 4.693988000  | 17.095399000 |   |              |              |              |
| 8 | 10.604017000 | 2.784814000  | 15.090583000 |   |              |              |              |
| 1 | 10.041107000 | 3.535001000  | 15.436228000 |   |              |              |              |
| 1 | 10.982271000 | 3.110160000  | 14.260413000 |   |              |              |              |
| 1 | 2.123300000  | 4.939260000  | 16.274095000 |   |              |              |              |
| 1 | 0.723931000  | 4.943245000  | 16.908630000 |   |              |              |              |
| 8 | 9.172951000  | 6.693362000  | 18.901974000 |   |              |              |              |
| 7 | 12.549362000 | 9.817339000  | 20.198183000 |   |              |              |              |
| 6 | 12.699513000 | 8.774739000  | 21.226963000 |   |              |              |              |
| 6 | 12.098380000 | 7.449952000  | 20.733642000 |   |              |              |              |
| 8 | 12.936724000 | 6.747755000  | 19.808759000 |   |              |              |              |
| 1 | 12.808217000 | 9.450098000  | 19.281065000 |   |              |              |              |
| 1 | 12.085240000 | 9.080130000  | 22.089718000 |   |              |              |              |
| 1 | 11.102352000 | 7.617280000  | 20.304529000 |   |              |              |              |
| 1 | 11.985737000 | 6.778787000  | 21.594089000 |   |              |              |              |
| 1 | 12.966447000 | 7.255527000  | 18.959444000 |   |              |              |              |
| 1 | 1.161949000  | -0.578575000 | 17.585783000 |   |              |              |              |
| 1 | 2.015717000  | -1.173676000 | 19.023089000 |   |              |              |              |
| 1 | 8.930410000  | 4.579521000  | 25.207309000 |   |              |              |              |
| 1 | 6.752970000  | 5.277616000  | 13.423878000 |   |              |              |              |
| 1 | 2.761110000  | 8.252495000  | 21.041400000 |   |              |              |              |
| 1 | 2.619792000  | 5.091305000  | 18.672689000 |   |              |              |              |
| 6 | -3.295627000 | 3.830380000  | 16.372807000 |   |              |              |              |
| 1 | -3.340712000 | 4.195105000  | 15.341371000 |   |              |              |              |
| 1 | -2.449160000 | 3.140965000  | 16.449413000 |   |              |              |              |
| 1 | -4.216883000 | 3.276540000  | 16.583731000 |   |              |              |              |
| 1 | -3.989282000 | 5.673899000  | 17.297007000 |   |              |              |              |
| 1 | -3.116137000 | 4.611701000  | 18.387227000 |   |              |              |              |
| 1 | 2.701202000  | 3.177041000  | 11.872226000 |   |              |              |              |
| 1 | 3.368288000  | 4.781471000  | 12.045631000 |   |              |              |              |
| 1 | 1.994670000  | 2.762190000  | 15.381699000 |   |              |              |              |
| 1 | 2.453042000  | 1.833375000  | 13.927640000 |   |              |              |              |
| 1 | -0.940619000 | 2.369614000  | 12.218736000 |   |              |              |              |
| 1 | 0.109976000  | 0.606012000  | 14.310447000 |   |              |              |              |
| 1 | -1.189665000 | 1.557112000  | 14.675627000 |   |              |              |              |
| 1 | 3.235442000  | 11.995215000 | 13.779767000 |   |              |              |              |
| 1 | 3.663826000  | 13.320846000 | 12.698627000 |   |              |              |              |
| 1 | 3.321725000  | 14.980157000 | 14.542991000 |   |              |              |              |

## Cartesian coordinates for model B

### Wildtype

#### <sup>5</sup>Re - VioC reactant state

C 11.345235000000 4.335273000000 24.789841000000  
C 11.446038000000 5.752310000000 24.244728000000  
O 11.347152000000 6.006428000000 23.016545000000  
C 12.690579000000 3.586758000000 24.998346000000  
O 13.411623000000 3.427613000000 23.747993000000  
C 12.452244000000 2.191733000000 25.575817000000  
H 10.807580000000 4.344301000000 25.747771000000  
H 13.318107000000 4.169163000000 25.688695000000  
H 14.077316000000 4.170034000000 23.647992000000  
H 13.409653000000 1.682597000000 25.718463000000  
H 11.929651000000 2.238809000000 26.538280000000  
H 11.850192000000 1.596359000000 24.879970000000  
N 11.645243000000 6.758249000000 25.156083000000  
C 11.560765000000 8.181930000000 24.775297000000  
C 12.718854000000 8.588297000000 23.848621000000  
O 12.555308000000 9.447374000000 22.941364000000  
C 11.494632000000 9.074178000000 26.038668000000  
C 10.328698000000 8.756997000000 27.013646000000  
C 10.397138000000 9.727717000000 28.210632000000  
C 8.951328000000 8.840235000000 26.325496000000  
H 11.613132000000 6.543172000000 26.142912000000  
H 10.657348000000 8.325598000000 24.174740000000  
H 12.450766000000 8.997244000000 26.577457000000  
H 11.392747000000 10.118236000000 25.719809000000  
H 10.460135000000 7.729451000000 27.404104000000  
H 8.843935000000 8.097711000000 25.523391000000  
H 8.791023000000 9.839323000000 25.901434000000  
H 8.154264000000 8.650362000000 27.055052000000  
H 11.372435000000 6.672407000000 28.713148000000  
H 10.235643000000 10.752676000000 27.856767000000  
H 9.623218000000 9.482135000000 28.948574000000  
N 13.912434000000 7.987294000000 24.082316000000  
C 14.991519000000 7.927594000000 23.083785000000  
C 15.086613000000 6.443431000000 22.719472000000  
O 14.973282000000 5.577170000000 23.657918000000  
C 16.333223000000 8.544241000000 23.575643000000  
C 16.188932000000 10.071319000000 23.714739000000  
C 16.846182000000 7.910514000000 24.882875000000  
H 13.928128000000 7.221420000000 24.746601000000  
H 14.653253000000 8.498214000000 22.214213000000  
H 17.064292000000 8.336004000000 22.779293000000  
H 16.937052000000 6.823145000000 24.803812000000  
H 17.828653000000 8.324475000000 25.137758000000  
H 16.166746000000 8.136656000000 25.714025000000  
H 17.140300000000 10.519255000000 24.024005000000  
H 15.433951000000 10.320934000000 24.468874000000  
H 15.885371000000 10.534203000000 22.769462000000  
N 15.212224000000 6.104707000000 21.433808000000  
C 15.004927000000 4.713849000000 21.009496000000  
C 13.489551000000 4.449260000000 20.915699000000  
O 13.197388000000 3.017133000000 20.927090000000  
H 15.142660000000 6.780697000000 20.658837000000  
H 15.462896000000 4.038828000000 21.736670000000  
H 12.961137000000 4.933930000000 21.737943000000  
H 13.098811000000 4.846313000000 19.981199000000  
H 13.161001000000 2.749594000000 21.878437000000  
C 4.183570000000 11.115065000000 15.883872000000  
C 3.367128000000 9.861869000000 15.603596000000  
O 2.745818000000 9.243474000000 16.514743000000  
C 5.703180000000 10.925320000000 15.582403000000  
C 6.333414000000 9.823226000000 16.377002000000  
N 6.887954000000 10.045689000000 17.633442000000  
C 6.438809000000 8.464513000000 16.150213000000  
C 7.305930000000 8.862606000000 18.138261000000  
N 7.045663000000 7.882698000000 17.259354000000

H 3.801299000000 11.947321000000 15.277823000000  
H 5.852046000000 10.731638000000 14.513826000000  
H 6.212605000000 11.868936000000 15.808147000000  
H 6.135674000000 7.882682000000 15.298251000000  
H 7.765257000000 8.723719000000 19.099217000000  
H 7.071747000000 10.991126000000 18.064138000000  
N 3.387958000000 9.421313000000 14.325768000000  
C 2.947083000000 8.092631000000 13.887452000000  
C 4.181638000000 7.521671000000 13.160745000000  
O 4.865661000000 8.286088000000 12.423837000000  
C 1.684010000000 8.182455000000 12.990846000000  
O 0.583568000000 8.767410000000 13.729021000000  
C 1.281373000000 6.828167000000 12.395075000000  
H 3.962121000000 9.892113000000 13.633530000000  
H 2.709213000000 7.507089000000 14.780117000000  
H 1.896023000000 8.893361000000 12.185976000000  
H 0.188091000000 8.115775000000 14.360009000000  
H 0.376112000000 6.954167000000 11.793777000000  
H 2.071872000000 6.417410000000 11.757658000000  
H 1.064762000000 6.110579000000 13.196690000000  
N 4.518896000000 6.245064000000 13.429595000000  
C 5.828315000000 5.688629000000 13.043996000000  
C 5.922981000000 4.198104000000 13.426185000000  
C 7.336071000000 3.787855000000 13.867424000000  
C 7.681533000000 4.017846000000 15.336836000000  
O 8.696164000000 3.424682000000 15.806301000000  
O 6.914464000000 4.835266000000 16.038407000000  
H 3.911156000000 5.668764000000 14.007840000000  
H 6.620579000000 6.254344000000 13.548877000000  
H 5.615836000000 3.578009000000 12.573811000000  
H 5.224277000000 3.980323000000 14.239812000000  
H 7.523042000000 2.727755000000 13.673511000000  
H 8.093046000000 4.347028000000 13.299037000000  
C 8.221656000000 -2.253926000000 14.619396000000  
C 8.443777000000 -0.841243000000 15.192499000000  
C 9.257712000000 0.036624000000 14.222412000000  
C 7.105470000000 -0.166588000000 15.552790000000  
H 7.642936000000 -2.205830000000 13.686664000000  
H 9.025470000000 -0.944287000000 16.122764000000  
H 10.239240000000 -0.406736000000 14.013455000000  
H 8.730215000000 0.140073000000 13.261181000000  
H 9.413198000000 1.040910000000 14.633085000000  
H 7.274193000000 0.828361000000 15.980512000000  
H 6.538832000000 -0.764762000000 16.278288000000  
H 6.480746000000 -0.048229000000 14.656170000000  
C -3.587275000000 6.758384000000 20.537238000000  
C -3.364158000000 5.381357000000 21.186344000000  
C -2.472379000000 5.417330000000 22.452351000000  
C -2.585168000000 4.095791000000 23.238728000000  
C -1.000118000000 5.725750000000 22.110791000000  
H -2.643493000000 7.213891000000 20.218905000000  
H -4.340418000000 4.949637000000 21.454998000000  
H -2.907462000000 4.699800000000 20.452652000000  
H -2.848193000000 6.224482000000 23.102468000000  
H -1.972938000000 4.120026000000 24.148783000000  
H -3.621967000000 3.890557000000 23.532718000000  
H -2.240663000000 3.248230000000 22.627901000000  
H -0.884936000000 6.679708000000 21.587102000000  
H -0.388037000000 5.759022000000 23.021593000000  
H -0.594236000000 4.944020000000 21.451879000000  
C 10.442551000000 12.536834000000 14.161469000000  
C 11.764957000000 13.048644000000 14.730444000000  
O 12.334481000000 14.029420000000 14.193981000000  
C 9.475922000000 11.775042000000 15.103349000000  
C 9.961659000000 10.367860000000 15.421112000000  
O 10.498041000000 10.168206000000 16.587095000000  
O 9.889341000000 9.472049000000 14.500920000000  
H 9.940471000000 13.419964000000 13.754959000000  
H 9.306905000000 12.323056000000 16.035029000000  
H 8.519569000000 11.681575000000 14.577817000000  
N 12.309475000000 12.371933000000 15.792938000000

|   |                 |                 |                 |   |                 |                 |                 |
|---|-----------------|-----------------|-----------------|---|-----------------|-----------------|-----------------|
| C | 13.573797000000 | 12.787080000000 | 16.391012000000 | H | 5.582228000000  | 1.070059000000  | 21.917651000000 |
| C | 14.732842000000 | 11.792665000000 | 16.269670000000 | H | 7.665705000000  | 0.307723000000  | 20.712782000000 |
| O | 15.761550000000 | 11.960153000000 | 16.970943000000 | H | 6.737107000000  | 0.112612000000  | 19.217975000000 |
| H | 11.773761000000 | 11.639642000000 | 16.255432000000 | H | 6.975149000000  | 1.725670000000  | 19.909974000000 |
| H | 13.873163000000 | 13.716395000000 | 15.895304000000 | H | 3.252194000000  | 2.640021000000  | 19.365035000000 |
| N | 14.587599000000 | 10.785301000000 | 15.372067000000 | H | 5.015303000000  | 2.678515000000  | 19.289100000000 |
| C | 15.639698000000 | 9.815747000000  | 15.075336000000 | H | 4.199058000000  | 2.979632000000  | 20.825227000000 |
| C | 15.018981000000 | 8.460783000000  | 14.747363000000 | N | 0.798381000000  | 1.533893000000  | 20.734660000000 |
| O | 14.038433000000 | 8.665528000000  | 13.699299000000 | C | -0.512504000000 | 1.708680000000  | 20.096700000000 |
| H | 13.761936000000 | 10.721727000000 | 14.790245000000 | C | -0.428647000000 | 2.449874000000  | 18.757365000000 |
| H | 16.303564000000 | 9.751968000000  | 15.941727000000 | O | -0.833148000000 | 3.643713000000  | 18.654792000000 |
| H | 14.553615000000 | 8.024626000000  | 15.640456000000 | H | 1.052985000000  | 2.163938000000  | 21.481120000000 |
| H | 15.808043000000 | 7.770832000000  | 14.413775000000 | H | -0.959753000000 | 0.720313000000  | 19.947552000000 |
| H | 13.247267000000 | 8.080077000000  | 13.842751000000 | N | 0.099526000000  | 1.729505000000  | 17.739000000000 |
| C | 5.696472000000  | 15.380475000000 | 20.013973000000 | C | 0.312314000000  | 2.272632000000  | 16.398325000000 |
| C | 5.404633000000  | 15.366118000000 | 21.514360000000 | C | 1.807626000000  | 2.549199000000  | 16.120910000000 |
| O | 5.339485000000  | 16.440929000000 | 22.177009000000 | C | 2.056586000000  | 3.415571000000  | 14.901075000000 |
| C | 6.932354000000  | 14.592326000000 | 19.514523000000 | O | 2.865156000000  | 4.376992000000  | 14.936837000000 |
| C | 6.765267000000  | 13.081022000000 | 19.363137000000 | N | 1.382523000000  | 3.101879000000  | 13.760274000000 |
| O | 7.557992000000  | 12.481420000000 | 18.528679000000 | H | 0.486590000000  | 0.814168000000  | 17.986676000000 |
| O | 5.920135000000  | 12.444091000000 | 20.097066000000 | H | -0.250124000000 | 3.204288000000  | 16.326273000000 |
| H | 4.803458000000  | 15.017271000000 | 19.487416000000 | H | 2.354425000000  | 1.602156000000  | 16.011616000000 |
| H | 7.239747000000  | 14.982146000000 | 18.538895000000 | H | 2.234900000000  | 3.085333000000  | 16.968199000000 |
| H | 7.787708000000  | 14.764233000000 | 20.184140000000 | H | 0.737662000000  | 2.330279000000  | 13.704409000000 |
| N | 5.184512000000  | 14.148639000000 | 22.078210000000 | H | 1.526972000000  | 3.668076000000  | 12.936653000000 |
| C | 4.647313000000  | 13.996083000000 | 23.427717000000 | C | -3.084513000000 | 6.836311000000  | 16.225945000000 |
| C | 5.555164000000  | 14.406739000000 | 24.593293000000 | C | -1.694785000000 | 7.438633000000  | 16.336834000000 |
| O | 5.050705000000  | 14.603260000000 | 25.722630000000 | O | -0.752000000000 | 7.038751000000  | 15.570035000000 |
| H | 5.283265000000  | 13.339676000000 | 21.448865000000 | C | -3.048078000000 | 5.313335000000  | 16.020208000000 |
| H | 3.739319000000  | 14.597072000000 | 23.546978000000 | H | -3.678695000000 | 7.092855000000  | 17.110758000000 |
| H | 4.373954000000  | 12.944759000000 | 23.562513000000 | H | -2.614038000000 | 4.806087000000  | 16.888954000000 |
| N | 6.880946000000  | 14.537936000000 | 24.320106000000 | H | -4.060482000000 | 4.925338000000  | 15.867634000000 |
| C | 7.851531000000  | 15.013985000000 | 25.303049000000 | H | -2.444279000000 | 5.070434000000  | 15.140852000000 |
| C | 8.024911000000  | 16.552202000000 | 25.252720000000 | N | -1.515184000000 | 8.400693000000  | 17.259029000000 |
| O | 8.891806000000  | 17.106230000000 | 25.980156000000 | C | -0.239070000000 | 9.084957000000  | 17.497692000000 |
| C | 9.238474000000  | 14.352025000000 | 25.126369000000 | C | 0.289286000000  | 8.652526000000  | 18.872797000000 |
| C | 9.310634000000  | 12.852423000000 | 25.456173000000 | O | -0.506533000000 | 8.302618000000  | 19.790266000000 |
| O | 9.972226000000  | 12.493832000000 | 26.472479000000 | C | -0.378830000000 | 10.637348000000 | 17.387284000000 |
| O | 8.712131000000  | 12.029111000000 | 24.625420000000 | C | -0.796662000000 | 11.047889000000 | 15.962495000000 |
| H | 7.218016000000  | 14.265633000000 | 23.407468000000 | C | -1.327285000000 | 11.235124000000 | 18.444976000000 |
| H | 7.451558000000  | 14.777731000000 | 26.295272000000 | H | -2.232232000000 | 8.550880000000  | 17.957090000000 |
| H | 9.569570000000  | 14.501995000000 | 24.087962000000 | H | 0.459028000000  | 8.759399000000  | 16.725448000000 |
| H | 9.928489000000  | 14.881501000000 | 25.784038000000 | H | 0.632989000000  | 11.022603000000 | 17.573043000000 |
| N | 7.233726000000  | 17.238098000000 | 24.388142000000 | H | -0.139716000000 | 10.611637000000 | 15.202247000000 |
| C | 7.343353000000  | 18.684591000000 | 24.210079000000 | H | -0.770837000000 | 12.139580000000 | 15.861897000000 |
| C | 7.610254000000  | 19.073558000000 | 22.744309000000 | H | -1.822748000000 | 10.721510000000 | 15.749992000000 |
| C | 8.895611000000  | 18.541664000000 | 22.125062000000 | H | -1.060767000000 | 10.930400000000 | 19.461728000000 |
| C | 10.015705000000 | 18.168939000000 | 22.888899000000 | H | -1.298480000000 | 12.329558000000 | 18.396613000000 |
| C | 8.982161000000  | 18.438255000000 | 20.723779000000 | H | -2.367344000000 | 10.932970000000 | 18.261339000000 |
| C | 11.184875000000 | 17.714188000000 | 22.264661000000 | N | 1.630377000000  | 8.717098000000  | 19.020035000000 |
| C | 10.150172000000 | 17.989347000000 | 20.098989000000 | C | 2.290610000000  | 8.363437000000  | 20.275239000000 |
| C | 11.260498000000 | 17.625432000000 | 20.870687000000 | C | 2.623992000000  | 6.851123000000  | 20.383656000000 |
| H | 6.549996000000  | 16.757226000000 | 23.808285000000 | C | 3.638099000000  | 6.362594000000  | 19.394315000000 |
| H | 8.135679000000  | 19.030370000000 | 24.878304000000 | N | 3.305578000000  | 5.795378000000  | 18.162966000000 |
| H | 6.761509000000  | 18.730063000000 | 22.138875000000 | C | 5.015420000000  | 6.380126000000  | 19.436866000000 |
| H | 7.607384000000  | 20.174343000000 | 22.688548000000 | C | 4.451810000000  | 5.487616000000  | 17.502868000000 |
| H | 9.976004000000  | 18.198068000000 | 23.972894000000 | N | 5.511159000000  | 5.832553000000  | 18.253250000000 |
| H | 8.120657000000  | 18.713393000000 | 20.119498000000 | H | 2.201388000000  | 8.964357000000  | 18.207073000000 |
| H | 12.034137000000 | 17.420646000000 | 22.874465000000 | H | 1.624539000000  | 8.635023000000  | 21.099021000000 |
| H | 10.192122000000 | 17.917437000000 | 19.015895000000 | H | 1.689691000000  | 6.288061000000  | 20.278814000000 |
| H | 12.167338000000 | 17.269152000000 | 20.391718000000 | H | 2.998572000000  | 6.667301000000  | 21.398760000000 |
| C | 2.978436000000  | 0.450995000000  | 21.094952000000 | H | 5.677806000000  | 6.750094000000  | 20.198481000000 |
| C | 1.680268000000  | 0.572137000000  | 20.329376000000 | H | 4.491900000000  | 5.046166000000  | 16.525421000000 |
| O | 1.421991000000  | -0.166013000000 | 19.336071000000 | H | 2.334918000000  | 5.664906000000  | 17.796873000000 |
| C | 4.213428000000  | 0.872758000000  | 20.245832000000 | C | 11.131545000000 | 0.285469000000  | 18.541623000000 |
| C | 5.512793000000  | 0.482290000000  | 20.989198000000 | C | 10.554393000000 | 1.657046000000  | 18.924339000000 |
| C | 4.166769000000  | 2.374989000000  | 19.908486000000 | N | 10.552727000000 | 2.613719000000  | 17.810534000000 |
| C | 6.793195000000  | 0.674792000000  | 20.159182000000 | C | 11.602094000000 | 3.378545000000  | 17.456898000000 |
| H | 2.949555000000  | 1.043296000000  | 22.019138000000 | N | 12.786254000000 | 3.321500000000  | 18.097444000000 |
| H | 4.168943000000  | 0.296656000000  | 19.309689000000 | N | 11.473677000000 | 4.233194000000  | 16.423091000000 |
| H | 5.437979000000  | -0.571992000000 | 21.294285000000 | H | 12.176021000000 | 0.374642000000  | 18.224626000000 |

H 10.563164000000 -0.158816000000 17.717489000000

H 9.513025000000 1.560731000000 19.242414000000

H 11.108552000000 2.079631000000 19.771196000000

H 9.676769000000 2.810050000000 17.323023000000

H 12.896888000000 2.850522000000 18.993931000000

H 13.454275000000 4.058110000000 17.857459000000

H 10.582745000000 4.286800000000 15.945095000000

H 12.169587000000 4.972649000000 16.339909000000

Fe 7.436421000000 5.892693000000 17.635083000000

O 7.904222000000 4.271272000000 19.067379000000

O 9.017389000000 6.071277000000 17.137474000000

C 8.123084000000 5.138299000000 20.004756000000

O 7.942499000000 6.393431000000 19.715039000000

C 8.572908000000 4.723212000000 21.379765000000

C 7.824826000000 5.467077000000 22.500029000000

H 8.449788000000 3.639124000000 21.465363000000

H 9.645461000000 4.944957000000 21.472366000000

H 6.746492000000 5.271297000000 22.460383000000

H 7.982130000000 6.545270000000 22.412055000000

N 11.468022000000 17.763596000000 17.255092000000

C 12.522408000000 7.995387000000 18.306187000000

C 13.646640000000 6.934904000000 18.208940000000

O 13.486988000000 5.965230000000 17.372898000000

C 11.925175000000 7.964408000000 19.732761000000

C 10.635097000000 8.761500000000 19.993717000000

C 10.757390000000 10.292230000000 19.871891000000

N 9.539890000000 10.979955000000 20.340736000000

C 9.253786000000 11.190810000000 21.648941000000

N 10.097703000000 10.850376000000 22.630718000000

N 8.089391000000 11.775635000000 22.008110000000

O 14.621382000000 7.096962000000 19.012724000000

H 12.955896000000 8.977174000000 18.089188000000

H 11.721750000000 6.918322000000 19.998791000000

H 12.709675000000 8.305555000000 20.414012000000

H 10.315120000000 8.512518000000 21.012246000000

H 9.835766000000 8.412870000000 19.332399000000

H 10.889416000000 10.588466000000 18.829168000000

H 11.626723000000 10.649492000000 20.439294000000

H 8.943690000000 11.434714000000 19.648156000000

H 11.012721000000 10.422901000000 22.504516000000

H 9.778235000000 11.097270000000 23.583266000000

H 7.303414000000 11.845087000000 21.369241000000

H 8.002662000000 12.001519000000 23.014382000000

H 11.881516000000 7.467232000000 16.344358000000

H 10.968597000000 8.680131000000 17.033810000000

H 10.773510000000 7.049573000000 17.518917000000

O 0.781664000000 5.437708000000 17.297010000000

H 0.110003000000 4.938739000000 17.819044000000

H 0.367781000000 6.004785000000 16.606608000000

O 11.738503000000 7.535105000000 14.469908000000

H 11.192882000000 8.379612000000 14.441882000000

H 11.097642000000 6.835761000000 14.195500000000

O 9.135690000000 6.718723000000 14.381420000000

H 9.056468000000 6.505530000000 15.341709000000

H 9.088466000000 7.699828000000 14.280765000000

H 11.092459000000 -0.397516000000 19.398546000000

H 3.085182000000 -0.602573000000 21.379864000000

H -1.147222000000 2.297443000000 20.757651000000

H -0.101862000000 1.561625000000 15.671907000000

H 7.670753000000 -2.889905000000 15.323923000000

H 9.176369000000 -2.745300000000 14.394600000000

H -4.244838000000 6.669992000000 19.661402000000

H -4.070568000000 7.447705000000 21.242224000000

H 3.208126000000 8.953923000000 20.355952000000

H -3.574216000000 7.311441000000 15.363710000000

H 5.981254000000 5.835141000000 11.968975000000

H 4.044322000000 11.371147000000 16.936920000000

H 5.826360000000 16.434723000000 19.757076000000

H 10.677238000000 11.889303000000 13.304756000000

H 15.490776000000 4.582219000000 20.041634000000

H 10.750604000000 3.761863000000 24.072563000000

H 16.233910000000 10.159956000000 14.217076000000

H 13.450491000000 13.001337000000 17.457839000000

H 6.409851000000 19.165771000000 24.532014000000

H 8.192896000000 5.146912000000 23.480090000000

**<sup>5</sup>TSH<sub>ca</sub> – ViOC WT transition state to HAT**

C 11.399845000000 4.691605000000 25.900143000000

C 11.550559000000 5.929575000000 25.029753000000

O 11.363063000000 5.915964000000 23.787192000000

C 12.732018000000 4.013577000000 26.320033000000

O 13.398122000000 3.436836000000 25.171147000000

C 12.476840000000 2.882527000000 27.317644000000

H 10.836024000000 4.951825000000 26.806834000000

H 13.386934000000 4.767226000000 26.784809000000

H 14.111329000000 4.042506000000 24.825061000000

H 13.425628000000 2.413691000000 27.594437000000

H 11.983797000000 3.249247000000 28.225632000000

H 11.841394000000 2.117384000000 26.857510000000

N 11.917751000000 7.079099000000 25.686158000000

C 11.940226000000 8.399526000000 25.032024000000

C 13.027756000000 8.466479000000 23.948928000000

O 12.879141000000 9.158708000000 22.905944000000

C 12.122057000000 9.518009000000 26.089737000000

C 11.072961000000 9.528784000000 27.233747000000

C 11.413330000000 10.651890000000 28.236466000000

C 9.637616000000 9.696788000000 26.697400000000

H 11.951064000000 7.072021000000 26.696073000000

H 10.996041000000 8.547152000000 24.498435000000

H 13.130731000000 9.435819000000 26.520911000000

H 12.065346000000 10.481880000000 25.572052000000

H 11.133116000000 8.568443000000 27.781551000000

H 9.331184000000 8.854156000000 26.063128000000

H 9.570703000000 10.623814000000 26.115104000000

H 8.926128000000 9.757718000000 27.530084000000

H 12.444772000000 10.557952000000 28.603257000000

H 11.290119000000 11.639733000000 27.772995000000

N 10.743641000000 10.599968000000 29.104418000000

H 14.157941000000 7.758509000000 24.187241000000

C 15.093815000000 7.386312000000 23.116790000000

C 15.090959000000 5.856395000000 23.119719000000

O 15.139732000000 5.230613000000 24.232773000000

C 16.511906000000 8.008754000000 23.274661000000

C 16.446550000000 9.529469000000 23.037269000000

C 17.169613000000 7.684387000000 24.629379000000

H 14.183560000000 7.155972000000 25.001399000000

H 14.659757000000 7.743835000000 22.177902000000

H 17.122881000000 7.560513000000 22.475494000000

H 17.213195000000 6.607343000000 24.815845000000

H 18.189588000000 8.085785000000 24.656798000000

H 16.608968000000 8.149549000000 25.449573000000

H 17.448057000000 9.971164000000 23.099915000000

H 15.814779000000 10.012322000000 23.791236000000

H 16.027546000000 9.763386000000 22.052870000000

N 14.982408000000 5.252795000000 21.929898000000

C 14.756845000000 3.813260000000 21.799509000000

C 13.252879000000 3.510169000000 21.903617000000

O 12.968703000000 2.156883000000 21.397930000000

H 14.773102000000 5.820604000000 21.085922000000

H 15.319660000000 3.284156000000 22.574042000000

H 12.888335000000 3.618507000000 22.927064000000

H 12.696524000000 4.186295000000 21.253766000000

H 13.096958000000 1.490952000000 22.099373000000

C 3.741591000000 11.341967000000 16.859789000000

C 3.056635000000 10.107475000000 16.294794000000

O 2.361435000000 9.331228000000 17.011263000000

C 5.293963000000 11.271297000000 16.736440000000

C 5.909357000000 10.115388000000 17.467021000000

N 6.503276000000 10.284371000000 18.713523000000

C 6.017349000000 8.767285000000 17.179808000000

C 6.951864000000 9.082644000000 19.146763000000

N 6.672543000000 8.139015000000 18.235391000000

H 3.381986000000 12.235824000000 16.332980000000



|   |                 |                 |                 |   |                 |                 |                 |
|---|-----------------|-----------------|-----------------|---|-----------------|-----------------|-----------------|
| H | 5.578454000000  | 11.231229000000 | 15.678121000000 | C | 12.487348000000 | 13.775814000000 | 15.953526000000 |
| H | 5.716149000000  | 12.200019000000 | 17.136324000000 | O | 13.120385000000 | 14.580317000000 | 16.684947000000 |
| H | 5.685283000000  | 8.217200000000  | 16.317786000000 | H | 10.320029000000 | 11.811829000000 | 15.832239000000 |
| H | 7.456795000000  | 8.911696000000  | 20.079994000000 | H | 10.691776000000 | 14.708464000000 | 15.242218000000 |
| H | 6.735834000000  | 11.220548000000 | 19.139581000000 | N | 13.083174000000 | 12.826073000000 | 15.194524000000 |
| N | 3.285200000000  | 9.865217000000  | 14.984324000000 | C | 14.520469000000 | 12.584889000000 | 15.159879000000 |
| C | 2.979195000000  | 8.611741000000  | 14.289843000000 | C | 14.765721000000 | 11.078627000000 | 15.114446000000 |
| C | 4.350437000000  | 8.120553000000  | 13.790784000000 | O | 14.021326000000 | 10.556835000000 | 13.988248000000 |
| O | 5.173263000000  | 8.952483000000  | 13.317557000000 | H | 12.528489000000 | 12.212948000000 | 14.611227000000 |
| C | 1.936162000000  | 8.838775000000  | 13.160789000000 | H | 14.970184000000 | 13.043299000000 | 16.044955000000 |
| O | 0.709192000000  | 9.349577000000  | 13.721065000000 | H | 14.429302000000 | 10.622551000000 | 16.057527000000 |
| C | 1.682881000000  | 7.573368000000  | 12.331566000000 | H | 15.842073000000 | 10.879175000000 | 15.003386000000 |
| H | 3.910658000000  | 10.470659000000 | 14.464944000000 | H | 13.667277000000 | 9.645035000000  | 14.174088000000 |
| H | 2.556223000000  | 7.920077000000  | 15.023067000000 | C | 6.232808000000  | 15.976548000000 | 20.684587000000 |
| H | 2.314779000000  | 9.636666000000  | 12.512716000000 | C | 6.415109000000  | 16.280574000000 | 22.170120000000 |
| H | 0.179588000000  | 8.626125000000  | 14.147547000000 | O | 6.703876000000  | 17.444069000000 | 22.571829000000 |
| H | 0.907411000000  | 7.781475000000  | 11.588623000000 | C | 7.221170000000  | 14.974613000000 | 20.039421000000 |
| H | 2.589586000000  | 7.252486000000  | 11.804232000000 | C | 6.947365000000  | 13.491740000000 | 20.278997000000 |
| H | 1.329486000000  | 6.758695000000  | 12.974832000000 | O | 7.405236000000  | 12.666060000000 | 19.387223000000 |
| N | 4.647951000000  | 6.813468000000  | 13.975106000000 | O | 6.355328000000  | 13.099494000000 | 21.350903000000 |
| C | 6.031945000000  | 6.322604000000  | 13.843902000000 | H | 5.205547000000  | 15.622915000000 | 20.524470000000 |
| C | 6.097024000000  | 4.799106000000  | 14.028447000000 | H | 7.236430000000  | 15.129645000000 | 18.956219000000 |
| C | 7.469268000000  | 4.312308000000  | 14.530523000000 | H | 8.246265000000  | 15.183901000000 | 20.378077000000 |
| C | 7.645383000000  | 4.307068000000  | 16.046860000000 | N | 6.218060000000  | 15.246159000000 | 23.031602000000 |
| O | 8.334352000000  | 3.390632000000  | 16.568177000000 | C | 6.139944000000  | 15.448381000000 | 24.475030000000 |
| O | 7.066955000000  | 5.284740000000  | 16.725210000000 | C | 7.446344000000  | 15.831752000000 | 25.182893000000 |
| H | 3.945464000000  | 6.175712000000  | 14.347525000000 | O | 7.408306000000  | 16.349162000000 | 26.320649000000 |
| H | 6.649442000000  | 6.811688000000  | 14.606048000000 | H | 6.079059000000  | 14.319579000000 | 22.606704000000 |
| H | 5.859854000000  | 4.302510000000  | 13.078271000000 | H | 5.434977000000  | 16.252751000000 | 24.707919000000 |
| H | 5.328588000000  | 4.484627000000  | 14.743372000000 | H | 5.762009000000  | 14.525681000000 | 24.926867000000 |
| H | 7.670037000000  | 3.292368000000  | 14.192415000000 | N | 8.592496000000  | 15.568795000000 | 24.495711000000 |
| H | 8.277399000000  | 4.942645000000  | 14.132338000000 | C | 9.929248000000  | 15.936421000000 | 24.963419000000 |
| C | 5.672019000000  | -1.750749000000 | 15.872171000000 | C | 10.400691000000 | 17.291940000000 | 24.393056000000 |
| C | 6.349593000000  | -0.409148000000 | 16.211504000000 | O | 11.593122000000 | 17.661616000000 | 24.564417000000 |
| C | 7.738117000000  | -0.284598000000 | 15.555753000000 | C | 10.948503000000 | 14.830968000000 | 24.621101000000 |
| C | 5.448945000000  | 0.777898000000  | 15.817311000000 | C | 10.720633000000 | 13.555066000000 | 25.449525000000 |
| H | 5.518674000000  | -1.842089000000 | 14.787673000000 | O | 10.938109000000 | 13.605055000000 | 26.689892000000 |
| H | 6.489378000000  | -0.369271000000 | 17.303828000000 | O | 10.305087000000 | 12.489068000000 | 24.795503000000 |
| H | 8.402471000000  | -1.098322000000 | 15.873481000000 | H | 8.513256000000  | 15.114308000000 | 23.595883000000 |
| H | 7.652568000000  | -0.335232000000 | 14.461047000000 | H | 9.876458000000  | 16.038019000000 | 26.053286000000 |
| H | 8.211449000000  | 0.669936000000  | 15.814371000000 | H | 10.907521000000 | 14.602197000000 | 23.549055000000 |
| H | 5.907761000000  | 1.726833000000  | 16.117013000000 | H | 11.940657000000 | 15.230617000000 | 24.848742000000 |
| H | 4.464649000000  | 0.692703000000  | 16.294612000000 | N | 9.485703000000  | 18.031662000000 | 23.713764000000 |
| H | 5.302623000000  | 0.797970000000  | 14.727211000000 | C | 9.811833000000  | 19.326745000000 | 23.116884000000 |
| C | -3.943841000000 | 4.990312000000  | 19.441037000000 | C | 9.478286000000  | 19.386891000000 | 21.615911000000 |
| C | -3.607487000000 | 3.498859000000  | 19.610206000000 | C | 10.257218000000 | 18.449632000000 | 20.701414000000 |
| C | -2.623172000000 | 3.201270000000  | 20.768305000000 | C | 11.466292000000 | 17.838301000000 | 21.076421000000 |
| C | -2.576677000000 | 1.688227000000  | 21.061958000000 | C | 9.762128000000  | 18.202771000000 | 19.406287000000 |
| C | -1.209746000000 | 3.741725000000  | 20.469590000000 | C | 12.155433000000 | 17.011982000000 | 20.177755000000 |
| H | -3.048004000000 | 5.596008000000  | 19.263489000000 | C | 10.455164000000 | 17.383357000000 | 18.508995000000 |
| H | -4.540248000000 | 2.942973000000  | 19.790536000000 | C | 11.661813000000 | 16.779447000000 | 18.888883000000 |
| H | -3.179804000000 | 3.099408000000  | 18.678827000000 | H | 8.536339000000  | 17.693604000000 | 23.583102000000 |
| H | -2.998977000000 | 3.707117000000  | 21.672803000000 | H | 10.871605000000 | 19.509564000000 | 23.309732000000 |
| H | -1.872819000000 | 1.459188000000  | 21.872893000000 | H | 8.405055000000  | 19.187216000000 | 21.495452000000 |
| H | -3.562316000000 | 1.305346000000  | 21.353740000000 | H | 9.637808000000  | 20.426641000000 | 21.286946000000 |
| H | -2.264553000000 | 1.135849000000  | 20.163562000000 | H | 11.868203000000 | 17.982368000000 | 22.074210000000 |
| H | -1.210779000000 | 4.825866000000  | 20.315399000000 | H | 8.825334000000  | 18.665243000000 | 19.101605000000 |
| H | -0.523116000000 | 3.519101000000  | 21.297380000000 | H | 13.084007000000 | 16.543734000000 | 20.491206000000 |
| H | -0.815225000000 | 3.272328000000  | 19.556873000000 | H | 10.055336000000 | 17.214082000000 | 17.512561000000 |
| C | 9.042432000000  | 11.443890000000 | 13.555160000000 | H | 12.199946000000 | 16.137602000000 | 18.196380000000 |
| C | 9.655381000000  | 12.736845000000 | 14.091659000000 | C | 2.595857000000  | -0.252091000000 | 19.890226000000 |
| O | 9.571097000000  | 13.793009000000 | 13.419234000000 | C | 1.731676000000  | -0.240799000000 | 18.644606000000 |
| C | 8.624439000000  | 10.359648000000 | 14.581452000000 | O | 2.193349000000  | -0.504320000000 | 17.496845000000 |
| C | 9.801644000000  | 9.561432000000  | 15.114818000000 | C | 3.932266000000  | 0.513658000000  | 19.722341000000 |
| O | 10.324785000000 | 9.906330000000  | 16.243608000000 | C | 4.831938000000  | 0.284085000000  | 20.960642000000 |
| O | 10.259294000000 | 8.586207000000  | 14.386065000000 | C | 3.683435000000  | 2.009849000000  | 19.456770000000 |
| H | 8.167001000000  | 11.752034000000 | 12.975962000000 | C | 6.276208000000  | 0.783626000000  | 20.786901000000 |
| H | 8.098033000000  | 10.816551000000 | 15.424154000000 | H | 2.039741000000  | 0.153442000000  | 20.746675000000 |
| H | 7.937792000000  | 9.668684000000  | 14.082015000000 | H | 4.439386000000  | 0.083978000000  | 18.847178000000 |
| N | 10.321344000000 | 12.675114000000 | 15.288618000000 | H | 4.853509000000  | -0.792828000000 | 21.186109000000 |
| C | 10.961134000000 | 13.851296000000 | 15.868150000000 | H | 4.372759000000  | 0.773471000000  | 21.833579000000 |

|   |                 |                 |                 |    |                 |                 |                 |
|---|-----------------|-----------------|-----------------|----|-----------------|-----------------|-----------------|
| H | 6.873582000000  | 0.553769000000  | 21.677152000000 | H  | 10.754721000000 | 1.932406000000  | 20.316958000000 |
| H | 6.754679000000  | 0.294567000000  | 19.928655000000 | H  | 9.452566000000  | 2.795783000000  | 17.823387000000 |
| H | 6.329979000000  | 1.865141000000  | 20.622909000000 | H  | 12.633360000000 | 2.495096000000  | 19.591753000000 |
| H | 3.068980000000  | 2.156006000000  | 18.560610000000 | H  | 13.287795000000 | 3.755225000000  | 18.564369000000 |
| H | 4.621258000000  | 2.551397000000  | 19.302587000000 | H  | 10.582693000000 | 4.308649000000  | 16.498566000000 |
| H | 3.165248000000  | 2.475614000000  | 20.306279000000 | H  | 12.185899000000 | 4.746700000000  | 16.977483000000 |
| N | 0.408854000000  | 0.047339000000  | 18.816875000000 | Fe | 7.330398000000  | 6.157337000000  | 18.492928000000 |
| C | -0.562900000000 | -0.028938000000 | 17.717294000000 | O  | 7.833854000000  | 4.497932000000  | 19.862595000000 |
| C | -0.545818000000 | 1.205961000000  | 16.808332000000 | O  | 9.038411000000  | 6.637351000000  | 18.194095000000 |
| O | -1.476759000000 | 2.049960000000  | 16.822310000000 | C  | 7.857906000000  | 5.301414000000  | 20.881120000000 |
| H | 0.074102000000  | 0.340855000000  | 19.723396000000 | O  | 7.515028000000  | 6.541184000000  | 20.678703000000 |
| H | -0.346660000000 | -0.928205000000 | 17.131029000000 | C  | 8.301517000000  | 4.830922000000  | 22.240432000000 |
| N | 0.546605000000  | 1.311752000000  | 16.007666000000 | C  | 7.517086000000  | 5.476702000000  | 23.393682000000 |
| C | 0.739956000000  | 2.485555000000  | 15.155375000000 | H  | 8.224918000000  | 3.738944000000  | 22.262058000000 |
| C | 2.016259000000  | 2.341496000000  | 14.309027000000 | H  | 9.367226000000  | 5.080624000000  | 22.356846000000 |
| C | 2.498397000000  | 3.693536000000  | 13.813611000000 | H  | 6.454061000000  | 5.210135000000  | 23.353927000000 |
| O | 2.728397000000  | 4.635341000000  | 14.621819000000 | H  | 7.595770000000  | 6.566166000000  | 23.345785000000 |
| N | 2.689830000000  | 3.837561000000  | 12.479486000000 | N  | 11.934004000000 | 7.896575000000  | 17.157825000000 |
| H | 1.298427000000  | 0.635926000000  | 16.146555000000 | C  | 12.295619000000 | 7.773946000000  | 18.612040000000 |
| H | 0.811263000000  | 3.386005000000  | 15.773404000000 | C  | 13.356553000000 | 6.662737000000  | 18.816884000000 |
| H | 1.858323000000  | 1.641667000000  | 13.481277000000 | O  | 13.458545000000 | 5.746081000000  | 17.923117000000 |
| H | 2.823523000000  | 1.933169000000  | 14.931678000000 | C  | 11.050621000000 | 7.492947000000  | 19.495861000000 |
| H | 2.500633000000  | 3.094759000000  | 11.825967000000 | C  | 10.560793000000 | 8.580025000000  | 20.453031000000 |
| H | 3.015646000000  | 4.725030000000  | 12.122147000000 | C  | 10.438977000000 | 10.011884000000 | 19.874819000000 |
| C | -2.908582000000 | 6.222046000000  | 15.371903000000 | N  | 9.529311000000  | 10.882842000000 | 20.642673000000 |
| C | -1.720584000000 | 7.114373000000  | 15.703420000000 | C  | 9.770865000000  | 11.357479000000 | 21.896340000000 |
| O | -0.813933000000 | 7.328694000000  | 14.846813000000 | N  | 10.891510000000 | 11.095634000000 | 22.575420000000 |
| C | -2.494430000000 | 4.897463000000  | 14.709116000000 | N  | 8.855788000000  | 12.141984000000 | 22.499875000000 |
| H | -3.506832000000 | 6.031448000000  | 16.270470000000 | O  | 14.005951000000 | 6.752652000000  | 19.911579000000 |
| H | -2.014337000000 | 4.222162000000  | 15.425287000000 | H  | 12.751034000000 | 8.721943000000  | 18.911529000000 |
| H | -3.374337000000 | 4.382270000000  | 14.308842000000 | H  | 10.069916000000 | 7.170010000000  | 18.780920000000 |
| H | -1.802811000000 | 5.097399000000  | 13.884598000000 | H  | 11.173760000000 | 6.554822000000  | 20.046583000000 |
| N | -1.721347000000 | 7.671375000000  | 16.939306000000 | H  | 11.248549000000 | 8.577384000000  | 21.311992000000 |
| C | -0.664104000000 | 8.539173000000  | 17.461248000000 | H  | 9.586177000000  | 8.262585000000  | 20.842610000000 |
| C | -0.248475000000 | 7.989021000000  | 18.832325000000 | H  | 10.031287000000 | 9.979644000000  | 18.859451000000 |
| O | -1.059907000000 | 7.325723000000  | 19.541216000000 | H  | 11.431749000000 | 10.480483000000 | 19.807551000000 |
| C | -1.104041000000 | 10.038525000000 | 17.568519000000 | H  | 8.803318000000  | 11.379804000000 | 20.122925000000 |
| C | -1.358916000000 | 10.637933000000 | 16.173501000000 | H  | 11.613251000000 | 10.431732000000 | 22.317535000000 |
| C | -2.323237000000 | 10.233520000000 | 18.489868000000 | H  | 10.949488000000 | 11.545314000000 | 23.507342000000 |
| H | -2.390025000000 | 7.352197000000  | 17.629893000000 | H  | 7.921848000000  | 12.289375000000 | 22.122449000000 |
| H | 0.183174000000  | 8.491678000000  | 16.773414000000 | H  | 9.110971000000  | 12.457463000000 | 23.450344000000 |
| H | -0.243392000000 | 10.558918000000 | 18.012242000000 | H  | 12.749439000000 | 7.952364000000  | 16.524951000000 |
| H | -0.491447000000 | 10.530086000000 | 15.514541000000 | H  | 11.341372000000 | 8.748233000000  | 16.934305000000 |
| H | -1.595786000000 | 11.705342000000 | 16.260873000000 | H  | 11.391404000000 | 7.078503000000  | 16.799534000000 |
| H | -2.214299000000 | 10.149149000000 | 15.690586000000 | O  | 12.854679000000 | 8.190910000000  | 14.558716000000 |
| H | -2.165674000000 | 9.806606000000  | 19.485679000000 | H  | 11.854984000000 | 8.342757000000  | 14.425113000000 |
| H | -2.538601000000 | 11.301873000000 | 18.606222000000 | H  | 13.156164000000 | 7.406125000000  | 14.067915000000 |
| H | -3.216054000000 | 9.763929000000  | 18.057637000000 | O  | 10.105058000000 | 6.235243000000  | 15.794597000000 |
| N | 1.012112000000  | 8.287099000000  | 19.226357000000 | H  | 9.526365000000  | 6.389467000000  | 16.597174000000 |
| C | 1.516702000000  | 7.923772000000  | 20.551688000000 | H  | 10.003199000000 | 6.965315000000  | 15.131778000000 |
| C | 2.005091000000  | 6.454362000000  | 20.670979000000 | H  | 10.289936000000 | -0.504654000000 | 19.974291000000 |
| C | 3.179749000000  | 6.103900000000  | 19.809430000000 | H  | 2.815113000000  | -1.304434000000 | 20.120748000000 |
| N | 3.071605000000  | 5.551817000000  | 18.524040000000 | H  | -1.562761000000 | -0.106138000000 | 18.143579000000 |
| C | 4.533105000000  | 6.249631000000  | 20.030558000000 | H  | -0.138554000000 | 2.615392000000  | 14.513920000000 |
| C | 4.332778000000  | 5.388630000000  | 18.026670000000 | H  | 4.692793000000  | -1.829187000000 | 16.359843000000 |
| N | 5.239237000000  | 5.803350000000  | 18.915287000000 | H  | 6.288323000000  | -2.599955000000 | 16.193182000000 |
| H | 1.631285000000  | 8.765709000000  | 18.565876000000 | H  | -4.633270000000 | 5.139843000000  | 18.599996000000 |
| H | 0.713076000000  | 8.075423000000  | 21.279435000000 | H  | -4.431208000000 | 5.387586000000  | 20.341106000000 |
| H | 1.156457000000  | 5.794008000000  | 20.463004000000 | H  | 2.338643000000  | 8.604407000000  | 20.791614000000 |
| H | 2.280807000000  | 6.288384000000  | 21.720062000000 | H  | -3.543714000000 | 6.793166000000  | 14.679844000000 |
| H | 5.051187000000  | 6.650386000000  | 20.884241000000 | H  | 6.431956000000  | 6.623148000000  | 12.869583000000 |
| H | 4.548870000000  | 5.000046000000  | 17.048541000000 | H  | 3.451246000000  | 11.429359000000 | 17.909221000000 |
| C | 10.453669000000 | 0.152208000000  | 19.111174000000 | H  | 6.337417000000  | 16.939586000000 | 20.178862000000 |
| C | 10.130230000000 | 1.608532000000  | 19.477684000000 | H  | 9.748625000000  | 11.006535000000 | 12.835300000000 |
| N | 10.291373000000 | 2.532281000000  | 18.349359000000 | H  | 15.124069000000 | 3.494341000000  | 20.819522000000 |
| C | 11.410014000000 | 3.216633000000  | 18.054781000000 | H  | 10.817502000000 | 3.961667000000  | 25.331878000000 |
| N | 12.553386000000 | 3.077728000000  | 18.760491000000 | H  | 14.964083000000 | 13.051488000000 | 14.270060000000 |
| N | 11.416838000000 | 4.078680000000  | 17.022908000000 | H  | 10.589835000000 | 14.038703000000 | 16.880782000000 |
| H | 11.498588000000 | 0.049887000000  | 18.797489000000 | H  | 9.244470000000  | 20.115710000000 | 23.629603000000 |
| H | 9.817622000000  | -0.192669000000 | 18.288751000000 | H  | 7.916378000000  | 5.144150000000  | 24.357452000000 |
| H | 9.090077000000  | 1.704636000000  | 19.801861000000 | C  | 1.844300000000  | 5.176733000000  | 17.819677000000 |

|                                                             |                 |                 |                 |   |                 |                 |                 |
|-------------------------------------------------------------|-----------------|-----------------|-----------------|---|-----------------|-----------------|-----------------|
| H                                                           | 2.109636000000  | 4.899023000000  | 16.798788000000 | H | 5.815935000000  | 12.100561000000 | 16.657072000000 |
| H                                                           | 1.354187000000  | 4.335154000000  | 18.319297000000 | H | 5.743199000000  | 8.103399000000  | 15.889598000000 |
| H                                                           | 1.156537000000  | 6.020068000000  | 17.786089000000 | H | 7.681318000000  | 8.813352000000  | 19.563640000000 |
| <b><sup>51</sup>I<sub>C3</sub> – ViOC WT – Intermediate</b> |                 |                 |                 |   |                 |                 |                 |
| C                                                           | 11.219647000000 | 4.373719000000  | 25.283144000000 | N | 3.507464000000  | 9.519551000000  | 14.563291000000 |
| C                                                           | 11.393528000000 | 5.763818000000  | 24.690218000000 | C | 3.191841000000  | 8.203306000000  | 14.000886000000 |
| O                                                           | 11.275342000000 | 5.984152000000  | 23.458040000000 | C | 4.531975000000  | 7.702887000000  | 13.429508000000 |
| C                                                           | 12.523736000000 | 3.550499000000  | 25.463836000000 | O | 5.327757000000  | 8.527635000000  | 12.899491000000 |
| O                                                           | 13.187246000000 | 3.317442000000  | 24.192927000000 | C | 2.046259000000  | 8.289014000000  | 12.952405000000 |
| C                                                           | 12.226156000000 | 2.188343000000  | 26.090859000000 | O | 0.854061000000  | 8.837152000000  | 13.562948000000 |
| H                                                           | 10.720076000000 | 4.443425000000  | 26.258985000000 | C | 1.758480000000  | 6.939656000000  | 12.284598000000 |
| H                                                           | 13.212633000000 | 4.111844000000  | 26.111456000000 | H | 4.142044000000  | 10.068716000000 | 13.992814000000 |
| H                                                           | 13.918624000000 | 3.993915000000  | 24.058718000000 | H | 2.860859000000  | 7.564804000000  | 14.825594000000 |
| H                                                           | 13.156330000000 | 1.625747000000  | 26.211661000000 | H | 2.339987000000  | 9.025275000000  | 12.197022000000 |
| H                                                           | 11.746472000000 | 2.293919000000  | 27.070905000000 | H | 0.374039000000  | 8.162410000000  | 14.104450000000 |
| H                                                           | 11.561651000000 | 1.611927000000  | 25.437160000000 | H | 0.906353000000  | 7.048998000000  | 11.607113000000 |
| N                                                           | 11.689945000000 | 6.783280000000  | 25.559335000000 | H | 2.618311000000  | 6.583718000000  | 11.707106000000 |
| C                                                           | 11.703365000000 | 8.191437000000  | 25.115756000000 | H | 1.509094000000  | 6.177158000000  | 13.033100000000 |
| C                                                           | 12.908192000000 | 8.485416000000  | 24.206439000000 | N | 4.846136000000  | 6.400012000000  | 13.609850000000 |
| O                                                           | 12.840979000000 | 9.345169000000  | 23.289043000000 | C | 6.225212000000  | 5.927379000000  | 13.395308000000 |
| C                                                           | 11.652840000000 | 9.152493000000  | 26.328557000000 | C | 6.341102000000  | 4.410681000000  | 13.615142000000 |
| C                                                           | 10.468716000000 | 8.924870000000  | 27.306167000000 | C | 7.717450000000  | 3.982606000000  | 14.150185000000 |
| C                                                           | 10.534001000000 | 9.964995000000  | 28.445232000000 | C | 7.890254000000  | 4.094104000000  | 15.666465000000 |
| C                                                           | 9.103792000000  | 8.992924000000  | 26.592529000000 | O | 8.769770000000  | 3.389342000000  | 16.223085000000 |
| H                                                           | 11.653246000000 | 6.611680000000  | 26.554580000000 | O | 7.093971000000  | 4.941515000000  | 16.301988000000 |
| H                                                           | 10.827264000000 | 8.358483000000  | 24.481991000000 | H | 4.172018000000  | 5.747454000000  | 14.005388000000 |
| H                                                           | 12.601515000000 | 9.084017000000  | 26.881459000000 | H | 6.877179000000  | 6.451073000000  | 14.103007000000 |
| H                                                           | 11.576149000000 | 10.172077000000 | 25.935011000000 | H | 6.140639000000  | 3.884929000000  | 12.670815000000 |
| H                                                           | 10.577602000000 | 7.922756000000  | 27.764183000000 | H | 5.581864000000  | 4.089542000000  | 14.333568000000 |
| H                                                           | 8.982039000000  | 8.189914000000  | 25.853161000000 | H | 7.935186000000  | 2.942783000000  | 13.887706000000 |
| H                                                           | 9.000635000000  | 9.961908000000  | 26.088061000000 | H | 8.518637000000  | 4.583414000000  | 13.693716000000 |
| H                                                           | 8.290767000000  | 8.893570000000  | 27.322388000000 | C | 6.613989000000  | -1.910829000000 | 15.202923000000 |
| H                                                           | 11.519766000000 | 9.964295000000  | 28.930294000000 | C | 7.205872000000  | -0.606927000000 | 15.771834000000 |
| H                                                           | 10.327198000000 | 10.973282000000 | 28.062833000000 | C | 8.338791000000  | -0.068351000000 | 14.876563000000 |
| H                                                           | 9.783330000000  | 9.735726000000  | 29.212182000000 | C | 6.112349000000  | 0.459856000000  | 15.977154000000 |
| N                                                           | 14.043566000000 | 7.784625000000  | 24.455750000000 | H | 6.170371000000  | -1.734109000000 | 14.212810000000 |
| C                                                           | 15.108695000000 | 7.638114000000  | 23.449767000000 | H | 7.637119000000  | -0.834471000000 | 16.759629000000 |
| C                                                           | 15.064879000000 | 6.156361000000  | 23.070539000000 | H | 9.147482000000  | -0.802746000000 | 14.774030000000 |
| O                                                           | 14.920764000000 | 5.286278000000  | 24.003493000000 | H | 7.959592000000  | 0.148592000000  | 13.867336000000 |
| C                                                           | 16.499974000000 | 8.133418000000  | 23.935964000000 | H | 8.761473000000  | 0.856833000000  | 15.285060000000 |
| C                                                           | 16.483964000000 | 9.665205000000  | 24.096535000000 | H | 6.532555000000  | 1.367004000000  | 16.425260000000 |
| C                                                           | 16.972904000000 | 7.442477000000  | 25.229376000000 | H | 5.313509000000  | 0.088352000000  | 16.632403000000 |
| H                                                           | 13.993868000000 | 7.025948000000  | 25.125616000000 | H | 5.659092000000  | 0.736091000000  | 15.013386000000 |
| H                                                           | 14.809195000000 | 8.237407000000  | 22.584640000000 | C | -3.936362000000 | 6.167212000000  | 19.880179000000 |
| H                                                           | 17.203899000000 | 7.877047000000  | 23.129044000000 | C | -3.654610000000 | 4.735083000000  | 20.366442000000 |
| H                                                           | 16.968966000000 | 6.352567000000  | 25.135368000000 | C | -2.822866000000 | 4.663571000000  | 21.671324000000 |
| H                                                           | 17.989645000000 | 7.768169000000  | 25.479262000000 | C | -2.881960000000 | 3.248652000000  | 22.281503000000 |
| H                                                           | 16.323322000000 | 7.713931000000  | 26.070950000000 | C | -1.361322000000 | 5.100835000000  | 21.444516000000 |
| H                                                           | 17.473795000000 | 10.031664000000 | 24.393209000000 | H | -3.011225000000 | 6.717659000000  | 19.677979000000 |
| H                                                           | 15.765237000000 | 9.963613000000  | 24.868189000000 | H | -4.612223000000 | 4.217422000000  | 20.529685000000 |
| H                                                           | 16.198450000000 | 10.162474000000 | 23.163226000000 | H | -3.122885000000 | 4.177844000000  | 19.580124000000 |
| N                                                           | 15.093659000000 | 5.844818000000  | 21.773775000000 | H | -3.278238000000 | 5.357134000000  | 22.397270000000 |
| C                                                           | 14.744457000000 | 4.492091000000  | 21.328326000000 | H | -2.307069000000 | 3.193259000000  | 23.214412000000 |
| C                                                           | 13.207413000000 | 4.321691000000  | 21.325605000000 | H | -3.914085000000 | 2.948211000000  | 22.500840000000 |
| O                                                           | 12.831483000000 | 2.916786000000  | 21.494257000000 | H | -2.463627000000 | 2.506271000000  | 21.585861000000 |
| H                                                           | 15.061696000000 | 6.587567000000  | 21.037423000000 | H | -1.289511000000 | 6.125543000000  | 21.066728000000 |
| H                                                           | 15.195037000000 | 3.758050000000  | 22.001931000000 | H | -0.787682000000 | 5.039738000000  | 22.378822000000 |
| H                                                           | 12.750068000000 | 4.912078000000  | 22.121033000000 | H | -0.882799000000 | 4.446471000000  | 20.701059000000 |
| H                                                           | 12.798596000000 | 4.655906000000  | 20.371972000000 | C | 8.502774000000  | 10.384933000000 | 13.303885000000 |
| H                                                           | 12.810291000000 | 2.742197000000  | 22.472071000000 | C | 8.349293000000  | 11.677090000000 | 14.108644000000 |
| C                                                           | 3.885817000000  | 11.179602000000 | 16.314965000000 | O | 7.582242000000  | 12.582290000000 | 13.686561000000 |
| C                                                           | 3.245347000000  | 9.885956000000  | 15.837923000000 | C | 8.747815000000  | 9.047370000000  | 14.052212000000 |
| O                                                           | 2.542506000000  | 9.166045000000  | 16.604804000000 | C | 10.148353000000 | 8.831895000000  | 14.600428000000 |
| C                                                           | 5.441999000000  | 11.158767000000 | 16.242109000000 | O | 10.493402000000 | 9.445298000000  | 15.685862000000 |
| C                                                           | 6.068204000000  | 10.016355000000 | 16.986854000000 | O | 10.941647000000 | 8.018347000000  | 13.972504000000 |
| N                                                           | 6.722383000000  | 10.190157000000 | 18.202023000000 | H | 7.575418000000  | 10.279097000000 | 12.734369000000 |
| C                                                           | 6.131066000000  | 8.659882000000  | 16.723439000000 | H | 8.037161000000  | 8.960362000000  | 14.880142000000 |
| C                                                           | 7.157558000000  | 8.983233000000  | 18.639804000000 | H | 8.545137000000  | 8.240026000000  | 13.344907000000 |
| N                                                           | 6.815397000000  | 8.029807000000  | 17.758314000000 | N | 9.110553000000  | 11.816059000000 | 15.233019000000 |
| H                                                           | 3.516732000000  | 12.018770000000 | 15.710860000000 | C | 9.211218000000  | 13.078385000000 | 15.960934000000 |
| H                                                           | 5.764276000000  | 11.154907000000 | 15.194750000000 | C | 10.633696000000 | 13.644081000000 | 16.018438000000 |

|   |                 |                 |                 |   |                 |                 |                 |
|---|-----------------|-----------------|-----------------|---|-----------------|-----------------|-----------------|
| O | 10.883925000000 | 14.659454000000 | 16.717878000000 | H | 6.849691000000  | 0.196493000000  | 19.729651000000 |
| H | 9.614547000000  | 10.998914000000 | 15.594809000000 | H | 6.834085000000  | 1.839129000000  | 20.389146000000 |
| H | 8.565455000000  | 13.803280000000 | 15.455865000000 | H | 3.264356000000  | 2.562142000000  | 19.102895000000 |
| N | 11.573332000000 | 12.986798000000 | 15.294875000000 | H | 4.995929000000  | 2.709882000000  | 19.404074000000 |
| C | 12.990276000000 | 13.327968000000 | 15.279393000000 | H | 3.853915000000  | 2.945877000000  | 20.729719000000 |
| C | 13.806873000000 | 12.038172000000 | 15.245634000000 | N | 0.584134000000  | 1.217621000000  | 19.996048000000 |
| O | 13.355010000000 | 11.279651000000 | 14.098965000000 | C | -0.568948000000 | 1.338330000000  | 19.094525000000 |
| H | 11.318337000000 | 12.191665000000 | 14.723708000000 | C | -0.296724000000 | 2.270452000000  | 17.908506000000 |
| H | 13.215444000000 | 13.925079000000 | 16.167483000000 | O | -0.851096000000 | 3.406884000000  | 17.840228000000 |
| H | 13.647954000000 | 11.479208000000 | 16.180234000000 | H | 0.589789000000  | 1.773938000000  | 20.838511000000 |
| H | 14.878301000000 | 12.278269000000 | 15.168498000000 | H | -0.829824000000 | 0.338433000000  | 18.732083000000 |
| H | 13.482421000000 | 10.300632000000 | 14.223673000000 | N | 0.565128000000  | 1.787315000000  | 16.989291000000 |
| C | 6.361373000000  | 15.783202000000 | 20.378447000000 | C | 0.999763000000  | 2.552009000000  | 15.814578000000 |
| C | 6.317688000000  | 16.001914000000 | 21.889670000000 | C | 2.321414000000  | 1.987584000000  | 15.274361000000 |
| O | 6.568492000000  | 17.131008000000 | 22.399385000000 | C | 2.947020000000  | 2.941705000000  | 14.271505000000 |
| C | 7.407999000000  | 14.784398000000 | 19.828976000000 | O | 3.064930000000  | 4.169826000000  | 14.522509000000 |
| C | 7.077204000000  | 13.301749000000 | 19.950788000000 | N | 3.389522000000  | 2.398623000000  | 13.107497000000 |
| O | 7.674725000000  | 12.502199000000 | 19.112414000000 | H | 1.000313000000  | 0.886645000000  | 17.204805000000 |
| O | 6.304702000000  | 12.869820000000 | 20.881069000000 | H | 1.141225000000  | 3.599620000000  | 16.091066000000 |
| H | 5.361058000000  | 15.476794000000 | 20.044177000000 | H | 2.178528000000  | 0.991752000000  | 14.838524000000 |
| H | 7.580553000000  | 14.992380000000 | 18.768472000000 | H | 3.032748000000  | 1.879490000000  | 16.104344000000 |
| H | 8.381483000000  | 14.951289000000 | 20.311466000000 | H | 3.309008000000  | 1.414098000000  | 12.909877000000 |
| N | 5.953881000000  | 14.930860000000 | 22.647338000000 | H | 3.855843000000  | 2.989127000000  | 12.434092000000 |
| C | 5.619997000000  | 15.062202000000 | 24.062354000000 | C | -3.084549000000 | 6.658575000000  | 15.588058000000 |
| C | 6.778071000000  | 15.388915000000 | 25.013336000000 | C | -1.747023000000 | 7.321484000000  | 15.867031000000 |
| O | 6.536434000000  | 15.859062000000 | 26.146850000000 | O | -0.730628000000 | 7.061325000000  | 15.136660000000 |
| H | 5.858381000000  | 14.035559000000 | 22.151376000000 | C | -2.934559000000 | 5.176806000000  | 15.206345000000 |
| H | 4.888098000000  | 15.863344000000 | 24.207756000000 | H | -3.748450000000 | 6.771412000000  | 16.453526000000 |
| H | 5.162376000000  | 14.123266000000 | 24.390377000000 | H | -2.509800000000 | 4.594332000000  | 16.031189000000 |
| N | 8.027949000000  | 15.126357000000 | 24.541039000000 | H | -3.909900000000 | 4.749714000000  | 14.950580000000 |
| C | 9.256836000000  | 15.433120000000 | 25.273500000000 | H | -2.271790000000 | 5.078568000000  | 14.341876000000 |
| C | 9.864453000000  | 16.791515000000 | 24.862019000000 | N | -1.691338000000 | 8.177416000000  | 16.904042000000 |
| O | 11.017569000000 | 17.108023000000 | 25.259791000000 | C | -0.482435000000 | 8.904737000000  | 17.306309000000 |
| C | 10.293840000000 | 14.307318000000 | 25.091265000000 | C | -0.083543000000 | 8.445973000000  | 18.715719000000 |
| C | 9.876794000000  | 13.010917000000 | 25.807738000000 | O | -0.956128000000 | 8.051481000000  | 19.540812000000 |
| O | 9.809402000000  | 13.020024000000 | 27.066158000000 | C | -0.682282000000 | 10.453059000000 | 17.234857000000 |
| O | 9.620923000000  | 11.967321000000 | 25.043111000000 | C | -0.918654000000 | 10.906781000000 | 15.781993000000 |
| H | 8.113795000000  | 14.720521000000 | 23.618522000000 | C | -1.797130000000 | 10.958869000000 | 18.170995000000 |
| H | 8.994045000000  | 15.496133000000 | 26.335628000000 | H | -2.461400000000 | 8.208503000000  | 17.560269000000 |
| H | 10.458227000000 | 14.118673000000 | 24.023449000000 | H | 0.309231000000  | 8.640039000000  | 16.604681000000 |
| H | 11.232822000000 | 14.665913000000 | 25.522880000000 | H | 0.273081000000  | 10.876257000000 | 17.574670000000 |
| N | 9.106900000000  | 17.596079000000 | 24.070820000000 | H | -0.140504000000 | 10.536243000000 | 15.105942000000 |
| C | 9.588349000000  | 18.891065000000 | 23.591964000000 | H | -0.935179000000 | 12.001949000000 | 15.726209000000 |
| C | 9.519330000000  | 19.014359000000 | 22.058773000000 | H | -1.886574000000 | 10.544084000000 | 15.412774000000 |
| C | 10.323116000000 | 17.995571000000 | 21.262299000000 | H | -1.655094000000 | 10.622589000000 | 19.202805000000 |
| C | 11.467708000000 | 17.357344000000 | 21.771297000000 | H | -1.822133000000 | 12.054526000000 | 18.166375000000 |
| C | 9.912968000000  | 17.681368000000 | 19.952128000000 | H | -2.783125000000 | 10.611885000000 | 17.833682000000 |
| C | 12.174136000000 | 16.432449000000 | 20.989159000000 | N | 1.234206000000  | 8.552535000000  | 18.996178000000 |
| C | 10.613594000000 | 16.757299000000 | 19.169923000000 | C | 1.793219000000  | 8.202362000000  | 20.299945000000 |
| C | 11.750970000000 | 16.127149000000 | 19.691423000000 | C | 2.212751000000  | 6.712290000000  | 20.414713000000 |
| H | 8.189175000000  | 17.297984000000 | 23.751097000000 | C | 3.306216000000  | 6.285663000000  | 19.482601000000 |
| H | 10.607515000000 | 19.007971000000 | 23.967763000000 | N | 3.065171000000  | 5.796769000000  | 18.198615000000 |
| H | 8.467470000000  | 18.939590000000 | 21.754190000000 | C | 4.677813000000  | 6.273489000000  | 19.633019000000 |
| H | 9.848582000000  | 20.032934000000 | 21.795765000000 | C | 4.258822000000  | 5.506236000000  | 17.618000000000 |
| H | 11.795993000000 | 17.546918000000 | 22.788305000000 | N | 5.264252000000  | 5.787217000000  | 18.463551000000 |
| H | 9.025496000000  | 18.164990000000 | 19.549062000000 | H | 1.868392000000  | 8.827856000000  | 18.240940000000 |
| H | 13.048421000000 | 15.941162000000 | 21.407309000000 | H | 1.036849000000  | 8.412624000000  | 21.061619000000 |
| H | 10.281749000000 | 16.494617000000 | 18.171428000000 | H | 1.320883000000  | 6.095332000000  | 20.255952000000 |
| H | 12.277232000000 | 15.400488000000 | 19.081870000000 | H | 2.541731000000  | 6.541802000000  | 21.447727000000 |
| C | 2.762406000000  | 0.341269000000  | 20.729747000000 | H | 5.282840000000  | 6.590500000000  | 20.464340000000 |
| C | 1.654546000000  | 0.422118000000  | 19.702730000000 | H | 4.369058000000  | 5.115938000000  | 16.622404000000 |
| O | 1.715176000000  | -0.206509000000 | 18.607071000000 | H | 2.126839000000  | 5.718897000000  | 17.742612000000 |
| C | 4.123195000000  | 0.848545000000  | 20.174270000000 | C | 10.512712000000 | 0.317441000000  | 18.575334000000 |
| C | 5.252916000000  | 0.529524000000  | 21.181658000000 | C | 10.290545000000 | 1.764750000000  | 19.036556000000 |
| C | 4.056311000000  | 2.348197000000  | 19.830580000000 | N | 10.790374000000 | 2.763328000000  | 18.077511000000 |
| C | 6.668496000000  | 0.785677000000  | 20.637985000000 | C | 12.071446000000 | 3.142406000000  | 17.964302000000 |
| H | 2.500387000000  | 0.902197000000  | 21.636797000000 | N | 13.020952000000 | 2.624663000000  | 18.789203000000 |
| H | 4.318050000000  | 0.282897000000  | 19.250977000000 | N | 12.456511000000 | 4.033506000000  | 17.034162000000 |
| H | 5.169809000000  | -0.526011000000 | 21.481238000000 | H | 11.579454000000 | 0.103175000000  | 18.452103000000 |
| H | 5.094977000000  | 1.124256000000  | 22.094717000000 | H | 10.013261000000 | 0.137560000000  | 17.617359000000 |
| H | 7.423781000000  | 0.495742000000  | 21.378085000000 | H | 9.225767000000  | 1.981888000000  | 19.148904000000 |

|    |                 |                 |                 |
|----|-----------------|-----------------|-----------------|
| H  | 10.752309000000 | 1.937130000000  | 20.015712000000 |
| H  | 10.083665000000 | 3.193097000000  | 17.471591000000 |
| H  | 12.821341000000 | 2.363879000000  | 19.761289000000 |
| H  | 13.972048000000 | 2.907001000000  | 18.605431000000 |
| H  | 11.782500000000 | 4.478159000000  | 16.393293000000 |
| H  | 13.232102000000 | 4.655961000000  | 17.279547000000 |
| Fe | 7.347833000000  | 5.973205000000  | 17.969350000000 |
| O  | 7.870338000000  | 4.368483000000  | 19.389131000000 |
| O  | 9.122238000000  | 6.466423000000  | 17.479969000000 |
| C  | 8.018012000000  | 5.223639000000  | 20.355651000000 |
| O  | 7.752686000000  | 6.470152000000  | 20.090562000000 |
| C  | 8.486503000000  | 4.804320000000  | 21.720441000000 |
| C  | 7.707787000000  | 5.491316000000  | 22.855946000000 |
| H  | 8.415322000000  | 3.714041000000  | 21.785292000000 |
| H  | 9.549282000000  | 5.068570000000  | 21.818866000000 |
| H  | 6.644122000000  | 5.225172000000  | 22.830621000000 |
| H  | 7.790569000000  | 6.578108000000  | 22.772100000000 |
| N  | 12.479921000000 | 8.023856000000  | 16.913809000000 |
| C  | 12.752550000000 | 8.210449000000  | 18.390118000000 |
| C  | 13.885484000000 | 7.229749000000  | 18.842364000000 |
| O  | 13.981222000000 | 6.111933000000  | 18.226182000000 |
| C  | 11.500057000000 | 7.926904000000  | 19.170450000000 |
| C  | 10.966690000000 | 8.773013000000  | 20.288824000000 |
| C  | 10.811658000000 | 10.290183000000 | 19.953716000000 |
| N  | 9.674962000000  | 10.934772000000 | 20.629634000000 |
| C  | 9.640085000000  | 11.242248000000 | 21.953408000000 |
| N  | 10.647809000000 | 10.978857000000 | 22.787444000000 |
| N  | 8.554335000000  | 11.854430000000 | 22.474141000000 |
| O  | 14.562263000000 | 7.636368000000  | 19.848928000000 |
| H  | 13.108545000000 | 9.232077000000  | 18.538477000000 |
| H  | 9.421237000000  | 7.341862000000  | 17.796493000000 |
| H  | 11.115293000000 | 6.912670000000  | 19.078638000000 |
| H  | 11.607715000000 | 8.661112000000  | 21.179442000000 |
| H  | 9.984114000000  | 8.377598000000  | 20.572338000000 |
| H  | 10.621548000000 | 10.409350000000 | 18.883060000000 |
| H  | 11.741425000000 | 10.828536000000 | 20.181755000000 |
| H  | 8.974665000000  | 11.392265000000 | 20.038563000000 |
| H  | 11.479575000000 | 10.436066000000 | 22.582194000000 |
| H  | 10.502227000000 | 11.302980000000 | 23.764895000000 |
| H  | 7.703227000000  | 12.016042000000 | 21.940531000000 |
| H  | 8.599782000000  | 12.040093000000 | 23.486113000000 |
| H  | 13.301180000000 | 8.165068000000  | 16.302276000000 |
| H  | 11.745358000000 | 8.692169000000  | 16.552463000000 |
| H  | 12.110688000000 | 7.069012000000  | 16.696417000000 |
| O  | 0.661136000000  | 5.572267000000  | 17.060571000000 |
| H  | 0.003191000000  | 4.898043000000  | 17.358773000000 |
| H  | 0.336302000000  | 6.086254000000  | 16.286211000000 |
| O  | 13.466527000000 | 8.564703000000  | 14.384929000000 |
| H  | 12.495274000000 | 8.325054000000  | 14.163259000000 |
| H  | 14.086018000000 | 8.115348000000  | 13.783654000000 |
| O  | 10.980637000000 | 5.901192000000  | 15.790499000000 |
| H  | 10.167894000000 | 6.039698000000  | 16.390147000000 |
| H  | 10.912139000000 | 6.414534000000  | 14.951625000000 |
| H  | 10.105704000000 | -0.382636000000 | 19.315195000000 |
| H  | 2.864257000000  | -0.713940000000 | 21.013912000000 |
| H  | -1.407956000000 | 1.750665000000  | 19.653257000000 |
| H  | 0.224338000000  | 2.516897000000  | 15.037060000000 |
| H  | 5.828985000000  | -2.311773000000 | 15.856250000000 |
| H  | 7.386242000000  | -2.681364000000 | 15.088360000000 |
| H  | -4.539635000000 | 6.151878000000  | 18.962129000000 |
| H  | -4.501055000000 | 6.731300000000  | 20.634273000000 |
| H  | 2.660888000000  | 8.844465000000  | 20.481261000000 |
| H  | -3.550136000000 | 7.256065000000  | 14.756065000000 |
| H  | 6.553079000000  | 6.210935000000  | 12.389123000000 |
| H  | 3.559736000000  | 11.336326000000 | 17.346002000000 |
| H  | 6.568522000000  | 16.767153000000 | 19.950799000000 |
| H  | 9.308109000000  | 10.548297000000 | 12.572642000000 |
| H  | 15.154657000000 | 4.358092000000  | 20.324655000000 |
| H  | 10.563694000000 | 3.819881000000  | 24.604914000000 |
| H  | 13.230990000000 | 13.931594000000 | 14.393801000000 |
| H  | 8.855372000000  | 12.975154000000 | 16.993948000000 |

|   |                |                 |                 |
|---|----------------|-----------------|-----------------|
| H | 8.982925000000 | 19.694684000000 | 24.033779000000 |
| H | 8.111847000000 | 5.191579000000  | 23.828074000000 |

**<sup>5</sup>TS<sub>reb,C3</sub> – VioC WT transition state for radical rebound**

|   |                 |                 |                 |
|---|-----------------|-----------------|-----------------|
| C | 11.411642000000 | 4.295749000000  | 25.232809000000 |
| C | 11.534572000000 | 5.683609000000  | 24.623899000000 |
| O | 11.408698000000 | 5.886585000000  | 23.388793000000 |
| C | 12.744326000000 | 3.521414000000  | 25.423038000000 |
| O | 13.407774000000 | 3.282935000000  | 24.152833000000 |
| C | 12.496267000000 | 2.163036000000  | 26.078827000000 |
| H | 10.910340000000 | 4.360209000000  | 26.208029000000 |
| H | 13.416994000000 | 4.118928000000  | 26.055353000000 |
| H | 14.105429000000 | 3.986662000000  | 23.992041000000 |
| H | 13.445445000000 | 1.634217000000  | 26.204061000000 |
| H | 12.019655000000 | 2.272086000000  | 27.059910000000 |
| H | 11.847164000000 | 1.552027000000  | 25.441310000000 |
| N | 11.792909000000 | 6.724270000000  | 25.477339000000 |
| C | 11.750632000000 | 8.124782000000  | 25.011495000000 |
| C | 12.893080000000 | 8.418835000000  | 24.025790000000 |
| O | 12.735882000000 | 9.201849000000  | 23.052566000000 |
| C | 11.759093000000 | 9.096824000000  | 26.216148000000 |
| C | 10.616545000000 | 8.880898000000  | 27.244275000000 |
| C | 10.755636000000 | 9.906257000000  | 28.389626000000 |
| C | 9.223040000000  | 8.983969000000  | 26.592161000000 |
| H | 11.769635000000 | 6.567082000000  | 26.475318000000 |
| H | 10.834375000000 | 8.268728000000  | 24.431144000000 |
| H | 12.730927000000 | 9.025663000000  | 26.726751000000 |
| H | 11.673585000000 | 10.115851000000 | 25.822668000000 |
| H | 10.724027000000 | 7.871021000000  | 27.685509000000 |
| H | 9.049756000000  | 8.187378000000  | 25.856099000000 |
| H | 9.114170000000  | 9.956108000000  | 26.094610000000 |
| H | 8.441484000000  | 8.899052000000  | 27.357160000000 |
| H | 11.756417000000 | 9.866246000000  | 28.841365000000 |
| H | 10.573036000000 | 10.922854000000 | 28.017088000000 |
| H | 10.022930000000 | 9.695606000000  | 29.178924000000 |
| N | 14.079549000000 | 7.807586000000  | 24.274353000000 |
| C | 15.117375000000 | 7.667649000000  | 23.240320000000 |
| C | 15.131244000000 | 6.173335000000  | 22.913578000000 |
| O | 15.061584000000 | 5.329650000000  | 23.876847000000 |
| C | 16.500060000000 | 8.237631000000  | 23.668521000000 |
| C | 16.427284000000 | 9.773044000000  | 23.765592000000 |
| C | 17.030544000000 | 7.621213000000  | 24.977195000000 |
| H | 14.102005000000 | 7.092863000000  | 24.991956000000 |
| H | 14.765086000000 | 8.223262000000  | 22.366074000000 |
| H | 17.194227000000 | 7.973987000000  | 22.855515000000 |
| H | 17.067200000000 | 6.528979000000  | 24.929000000000 |
| H | 18.039180000000 | 7.996451000000  | 25.186454000000 |
| H | 16.391663000000 | 7.904232000000  | 25.823076000000 |
| H | 17.406638000000 | 10.188644000000 | 24.030326000000 |
| H | 15.709823000000 | 10.076652000000 | 24.536296000000 |
| H | 16.109646000000 | 10.220170000000 | 22.817306000000 |
| N | 15.136741000000 | 5.817561000000  | 21.625934000000 |
| C | 14.839897000000 | 4.433151000000  | 21.242437000000 |
| C | 13.312218000000 | 4.209652000000  | 21.275096000000 |
| O | 12.990428000000 | 2.793079000000  | 21.449800000000 |
| H | 15.007385000000 | 6.525264000000  | 20.873304000000 |
| H | 15.331495000000 | 3.750071000000  | 21.939847000000 |
| H | 12.853746000000 | 4.784945000000  | 22.080099000000 |
| H | 12.871741000000 | 4.529398000000  | 20.331291000000 |
| H | 13.004329000000 | 2.619533000000  | 22.426491000000 |
| C | 3.756735000000  | 11.248339000000 | 16.143962000000 |
| C | 3.155693000000  | 9.918045000000  | 15.714512000000 |
| O | 2.462526000000  | 9.213592000000  | 16.502234000000 |
| C | 5.314416000000  | 11.257427000000 | 16.099098000000 |
| C | 5.950711000000  | 10.178133000000 | 16.923349000000 |
| N | 6.538371000000  | 10.423654000000 | 18.159851000000 |
| C | 6.082042000000  | 8.817124000000  | 16.714015000000 |
| C | 7.000367000000  | 9.249116000000  | 18.658409000000 |
| N | 6.746391000000  | 8.253006000000  | 17.798117000000 |
| H | 3.377590000000  | 12.050277000000 | 15.496729000000 |

|   |                 |                 |                 |   |                 |                 |                 |
|---|-----------------|-----------------|-----------------|---|-----------------|-----------------|-----------------|
| H | 5.651169000000  | 11.174196000000 | 15.058465000000 | C | 10.858840000000 | 13.673131000000 | 16.250962000000 |
| H | 5.664262000000  | 12.234004000000 | 16.450947000000 | O | 11.166726000000 | 14.638692000000 | 16.995374000000 |
| H | 5.760103000000  | 8.216950000000  | 15.882249000000 | H | 9.407325000000  | 11.155738000000 | 15.700659000000 |
| H | 7.493347000000  | 9.137468000000  | 19.607078000000 | H | 8.873687000000  | 14.088346000000 | 15.575181000000 |
| H | 6.778334000000  | 11.354616000000 | 18.579186000000 | N | 11.767723000000 | 12.936436000000 | 15.567507000000 |
| N | 3.442667000000  | 9.510732000000  | 14.457602000000 | C | 13.207365000000 | 13.156326000000 | 15.604888000000 |
| C | 3.185425000000  | 8.163160000000  | 13.941666000000 | C | 13.908147000000 | 11.805988000000 | 15.477427000000 |
| C | 4.558425000000  | 7.689318000000  | 13.425406000000 | O | 13.390710000000 | 11.173550000000 | 14.281612000000 |
| O | 5.346185000000  | 8.530163000000  | 12.905578000000 | H | 11.464774000000 | 12.201979000000 | 14.941408000000 |
| C | 2.067821000000  | 8.172492000000  | 12.859436000000 | H | 13.464522000000 | 13.657480000000 | 16.542315000000 |
| O | 0.846420000000  | 8.716872000000  | 13.411865000000 | H | 13.700053000000 | 11.197210000000 | 16.370653000000 |
| C | 1.833381000000  | 6.789066000000  | 12.242887000000 | H | 14.996219000000 | 11.953834000000 | 15.410861000000 |
| H | 4.076755000000  | 10.050024000000 | 13.877740000000 | H | 13.417816000000 | 10.181433000000 | 14.338560000000 |
| H | 2.854072000000  | 7.545829000000  | 14.782040000000 | C | 6.389505000000  | 15.935076000000 | 20.495949000000 |
| H | 2.365559000000  | 8.882726000000  | 12.080721000000 | C | 6.381229000000  | 16.105765000000 | 22.014069000000 |
| H | 0.367474000000  | 8.053447000000  | 13.968372000000 | O | 6.662175000000  | 17.214004000000 | 22.553144000000 |
| H | 0.998631000000  | 6.847507000000  | 11.537964000000 | C | 7.407219000000  | 14.937754000000 | 19.891468000000 |
| H | 2.718157000000  | 6.432199000000  | 11.705134000000 | C | 7.050845000000  | 13.457799000000 | 19.972245000000 |
| H | 1.582898000000  | 6.051476000000  | 13.015199000000 | O | 7.612984000000  | 12.672232000000 | 19.099223000000 |
| N | 4.904834000000  | 6.401263000000  | 13.639486000000 | O | 6.282576000000  | 13.014742000000 | 20.902122000000 |
| C | 6.305204000000  | 5.964707000000  | 13.484523000000 | H | 5.377571000000  | 15.654580000000 | 20.174264000000 |
| C | 6.450258000000  | 4.454262000000  | 13.726242000000 | H | 7.557291000000  | 15.176799000000 | 18.833870000000 |
| C | 7.821498000000  | 4.055267000000  | 14.305350000000 | H | 8.394441000000  | 15.072389000000 | 20.355774000000 |
| C | 7.925143000000  | 4.166238000000  | 15.828253000000 | N | 6.015399000000  | 15.017001000000 | 22.744752000000 |
| O | 8.581628000000  | 3.277920000000  | 16.445238000000 | C | 5.712287000000  | 15.105843000000 | 24.170610000000 |
| O | 7.328787000000  | 5.191061000000  | 16.390687000000 | C | 6.894429000000  | 15.377832000000 | 25.108702000000 |
| H | 4.234655000000  | 5.734446000000  | 14.018340000000 | O | 6.683058000000  | 15.798106000000 | 26.267848000000 |
| H | 6.913616000000  | 6.508441000000  | 14.214568000000 | H | 5.891532000000  | 14.141022000000 | 22.220740000000 |
| H | 6.286577000000  | 3.914859000000  | 12.782037000000 | H | 4.998624000000  | 15.914798000000 | 24.357477000000 |
| H | 5.674326000000  | 4.122371000000  | 14.422797000000 | H | 5.243146000000  | 14.164933000000 | 24.475118000000 |
| H | 8.067029000000  | 3.022481000000  | 14.044614000000 | N | 8.130277000000  | 15.127052000000 | 25.127020000000 |
| H | 8.619574000000  | 4.684663000000  | 13.886462000000 | C | 9.379517000000  | 15.396134000000 | 25.307590000000 |
| C | 6.724066000000  | -1.965330000000 | 15.380035000000 | C | 9.977589000000  | 16.775165000000 | 24.950958000000 |
| C | 7.290681000000  | -0.640679000000 | 15.926137000000 | O | 11.131937000000 | 17.078299000000 | 25.354772000000 |
| C | 8.434062000000  | -0.108989000000 | 15.040008000000 | C | 10.412561000000 | 14.283666000000 | 25.031881000000 |
| C | 6.183965000000  | 0.420141000000  | 16.085819000000 | C | 10.035404000000 | 12.951947000000 | 25.702844000000 |
| H | 6.296571000000  | -1.818343000000 | 14.378009000000 | O | 10.159608000000 | 12.864624000000 | 26.954990000000 |
| H | 7.705798000000  | -0.839169000000 | 16.927396000000 | O | 9.608740000000  | 11.986411000000 | 24.915129000000 |
| H | 9.257738000000  | -0.831339000000 | 14.976984000000 | H | 8.189903000000  | 14.754906000000 | 23.657992000000 |
| H | 8.073363000000  | 0.071566000000  | 14.016870000000 | H | 9.149754000000  | 15.407861000000 | 26.379008000000 |
| H | 8.825892000000  | 0.836305000000  | 15.431792000000 | H | 10.529119000000 | 14.146852000000 | 23.949560000000 |
| H | 6.594991000000  | 1.346431000000  | 16.501491000000 | H | 11.366012000000 | 14.626931000000 | 25.441854000000 |
| H | 5.382449000000  | 0.062455000000  | 16.745721000000 | N | 9.211888000000  | 17.608427000000 | 24.198704000000 |
| H | 5.737512000000  | 0.657831000000  | 15.108571000000 | C | 9.690394000000  | 18.918723000000 | 23.760686000000 |
| C | -3.960290000000 | 6.054673000000  | 19.782571000000 | C | 9.642421000000  | 19.080083000000 | 22.229491000000 |
| C | -3.645614000000 | 4.639519000000  | 20.297695000000 | C | 10.448010000000 | 18.070515000000 | 21.423476000000 |
| C | -2.821677000000 | 4.613877000000  | 21.609356000000 | C | 11.603093000000 | 17.443371000000 | 21.922752000000 |
| C | -2.856469000000 | 3.212648000000  | 22.252281000000 | C | 10.029063000000 | 17.750904000000 | 20.117615000000 |
| C | -1.367719000000 | 5.075718000000  | 21.382775000000 | C | 12.310863000000 | 16.523799000000 | 21.135948000000 |
| H | -3.047597000000 | 6.623603000000  | 19.575730000000 | C | 10.731817000000 | 16.831853000000 | 19.331301000000 |
| H | -4.590512000000 | 4.099937000000  | 20.463782000000 | C | 11.879323000000 | 16.212086000000 | 19.842489000000 |
| H | -3.094048000000 | 4.083763000000  | 19.524071000000 | H | 8.292280000000  | 17.321472000000 | 23.873767000000 |
| H | -3.296163000000 | 5.314463000000  | 22.316031000000 | H | 10.703799000000 | 19.032219000000 | 24.152665000000 |
| H | -2.289001000000 | 3.191514000000  | 23.191163000000 | H | 8.594083000000  | 19.021629000000 | 21.909974000000 |
| H | -3.883846000000 | 2.895380000000  | 22.470104000000 | H | 9.984089000000  | 20.101638000000 | 21.995279000000 |
| H | -2.416213000000 | 2.462409000000  | 21.578789000000 | H | 11.936521000000 | 17.634975000000 | 22.937607000000 |
| H | -1.313359000000 | 6.091456000000  | 20.978925000000 | H | 9.133555000000  | 18.225590000000 | 19.721787000000 |
| H | -0.800004000000 | 5.050058000000  | 22.322234000000 | H | 13.192901000000 | 16.040812000000 | 21.547471000000 |
| H | -0.869245000000 | 4.413583000000  | 20.659252000000 | H | 10.394494000000 | 16.564840000000 | 18.335913000000 |
| C | 8.726990000000  | 10.817978000000 | 13.180586000000 | H | 12.403548000000 | 15.488504000000 | 19.228167000000 |
| C | 8.745353000000  | 12.118403000000 | 13.984364000000 | C | 2.665771000000  | 0.432536000000  | 20.817118000000 |
| O | 8.406961000000  | 13.193855000000 | 13.432106000000 | C | 1.587376000000  | 0.468065000000  | 19.756767000000 |
| C | 8.535720000000  | 9.478566000000  | 13.939736000000 | O | 1.685933000000  | -0.194709000000 | 18.684511000000 |
| C | 9.786645000000  | 8.974533000000  | 14.634244000000 | C | 4.034318000000  | 0.939232000000  | 20.280137000000 |
| O | 10.010785000000 | 9.350173000000  | 15.858792000000 | C | 5.140359000000  | 0.668110000000  | 21.326665000000 |
| O | 10.588418000000 | 8.194080000000  | 13.982499000000 | C | 3.958585000000  | 2.425904000000  | 19.885250000000 |
| H | 7.912916000000  | 10.928330000000 | 12.458434000000 | C | 6.565513000000  | 0.947474000000  | 20.821177000000 |
| H | 7.736261000000  | 9.577987000000  | 14.677692000000 | H | 2.372766000000  | 1.019654000000  | 21.697662000000 |
| H | 8.224723000000  | 8.726893000000  | 13.210824000000 | H | 4.259340000000  | 0.346185000000  | 19.381243000000 |
| N | 9.190974000000  | 12.059920000000 | 15.278550000000 | H | 5.073264000000  | -0.383020000000 | 21.644930000000 |
| C | 9.391085000000  | 13.266398000000 | 16.078735000000 | H | 4.941365000000  | 1.276806000000  | 22.222203000000 |

|   |                 |                 |                 |    |                 |                 |                 |
|---|-----------------|-----------------|-----------------|----|-----------------|-----------------|-----------------|
| H | 7.304834000000  | 0.680287000000  | 21.585438000000 | H  | 9.164140000000  | 1.605996000000  | 19.528675000000 |
| H | 6.784072000000  | 0.355041000000  | 19.923345000000 | H  | 10.771203000000 | 1.765310000000  | 20.217051000000 |
| H | 6.716323000000  | 2.002333000000  | 20.568507000000 | H  | 9.707390000000  | 2.890119000000  | 17.738915000000 |
| H | 3.168684000000  | 2.610507000000  | 19.147603000000 | H  | 12.747517000000 | 2.314287000000  | 19.690451000000 |
| H | 4.897126000000  | 2.777705000000  | 19.448070000000 | H  | 13.685582000000 | 3.052453000000  | 18.454741000000 |
| H | 3.749813000000  | 3.053769000000  | 20.761809000000 | H  | 11.145429000000 | 4.241199000000  | 16.418866000000 |
| N | 0.503461000000  | 1.264855000000  | 19.990732000000 | H  | 12.654331000000 | 4.596946000000  | 17.153106000000 |
| C | -0.610945000000 | 1.357768000000  | 19.039096000000 | Fe | 7.458843000000  | 6.246702000000  | 18.114733000000 |
| C | -0.289469000000 | 2.267840000000  | 17.848352000000 | O  | 8.169539000000  | 4.735173000000  | 19.485281000000 |
| O | -0.827223000000 | 3.409559000000  | 17.746833000000 | O  | 9.224904000000  | 7.036760000000  | 17.627891000000 |
| H | 0.477289000000  | 1.849658000000  | 20.813406000000 | C  | 8.066337000000  | 5.511680000000  | 20.524676000000 |
| H | -0.848959000000 | 0.348633000000  | 18.687308000000 | O  | 7.638373000000  | 6.722693000000  | 20.336743000000 |
| N | 0.597549000000  | 1.761112000000  | 16.965901000000 | C  | 8.461465000000  | 5.019938000000  | 21.892083000000 |
| C | 1.080359000000  | 2.498745000000  | 15.792336000000 | C  | 7.689413000000  | 5.694597000000  | 23.034734000000 |
| C | 2.453486000000  | 1.965792000000  | 15.358935000000 | H  | 8.333732000000  | 3.931699000000  | 21.905633000000 |
| C | 3.094884000000  | 2.887301000000  | 14.335741000000 | H  | 9.537022000000  | 5.209945000000  | 22.026097000000 |
| O | 3.146738000000  | 4.131905000000  | 14.516324000000 | H  | 6.614998000000  | 5.484617000000  | 22.971050000000 |
| N | 3.624837000000  | 2.296296000000  | 13.232720000000 | H  | 7.820068000000  | 6.779470000000  | 22.998452000000 |
| H | 1.016459000000  | 0.860865000000  | 17.211306000000 | N  | 12.075083000000 | 7.868410000000  | 16.885144000000 |
| H | 1.168092000000  | 3.559344000000  | 16.038817000000 | C  | 12.336511000000 | 7.982288000000  | 18.363897000000 |
| H | 2.377804000000  | 0.941304000000  | 14.975721000000 | C  | 13.528578000000 | 7.035135000000  | 18.744695000000 |
| H | 3.119797000000  | 1.937610000000  | 16.231488000000 | O  | 13.591749000000 | 5.912262000000  | 18.131305000000 |
| H | 3.607143000000  | 1.298055000000  | 13.098422000000 | C  | 11.116640000000 | 7.603033000000  | 19.168714000000 |
| H | 4.110914000000  | 2.865285000000  | 12.554791000000 | C  | 10.499556000000 | 8.503035000000  | 20.193069000000 |
| C | -3.054293000000 | 6.485582000000  | 15.443846000000 | C  | 10.515995000000 | 10.023203000000 | 19.865753000000 |
| C | -1.738631000000 | 7.186653000000  | 15.733401000000 | N  | 9.469951000000  | 10.795487000000 | 20.555415000000 |
| O | -0.709123000000 | 6.956006000000  | 15.012212000000 | C  | 9.491731000000  | 11.122094000000 | 21.878357000000 |
| C | -2.859125000000 | 5.010591000000  | 15.057172000000 | N  | 10.487695000000 | 10.774854000000 | 22.695597000000 |
| H | -3.725821000000 | 6.575064000000  | 16.306255000000 | N  | 8.478981000000  | 11.836774000000 | 22.406602000000 |
| H | -2.420880000000 | 4.439546000000  | 15.882746000000 | O  | 14.286752000000 | 7.477193000000  | 19.670126000000 |
| H | -3.820528000000 | 4.556237000000  | 14.795351000000 | H  | 12.644778000000 | 9.009612000000  | 18.562081000000 |
| H | -2.189904000000 | 4.934782000000  | 14.195424000000 | H  | 9.161557000000  | 7.968546000000  | 17.322529000000 |
| N | -1.717229000000 | 8.045975000000  | 16.769261000000 | H  | 10.918271000000 | 6.542014000000  | 19.258256000000 |
| C | -0.535197000000 | 8.812800000000  | 17.177794000000 | H  | 11.018972000000 | 8.328957000000  | 21.154132000000 |
| C | -0.142083000000 | 8.382140000000  | 18.597514000000 | H  | 9.468981000000  | 8.168132000000  | 20.358452000000 |
| O | -1.015771000000 | 7.972881000000  | 19.414736000000 | H  | 10.330199000000 | 10.169202000000 | 18.797135000000 |
| C | -0.779130000000 | 10.353373000000 | 17.082807000000 | H  | 11.504015000000 | 10.450280000000 | 20.085303000000 |
| C | -1.009445000000 | 10.779428000000 | 15.620593000000 | H  | 8.825757000000  | 11.340529000000 | 19.975671000000 |
| C | -1.921388000000 | 10.838409000000 | 17.996608000000 | H  | 11.306641000000 | 10.222212000000 | 22.461594000000 |
| H | -2.491739000000 | 8.054017000000  | 17.420995000000 | H  | 10.396340000000 | 11.127337000000 | 23.667535000000 |
| H | 0.273132000000  | 8.562840000000  | 16.490341000000 | H  | 7.628466000000  | 12.053435000000 | 21.890134000000 |
| H | 0.158600000000  | 10.809132000000 | 17.428929000000 | H  | 8.582386000000  | 12.071259000000 | 23.406304000000 |
| H | -0.210528000000 | 10.424740000000 | 14.960445000000 | H  | 12.895743000000 | 8.071713000000  | 16.288193000000 |
| H | -1.060443000000 | 11.872637000000 | 15.548542000000 | H  | 11.311899000000 | 8.529588000000  | 16.568404000000 |
| H | -1.959813000000 | 10.380249000000 | 15.243630000000 | H  | 11.742793000000 | 6.918041000000  | 16.617231000000 |
| H | -1.784277000000 | 10.518549000000 | 19.034292000000 | O  | 0.734690000000  | 5.552585000000  | 16.975703000000 |
| H | -1.977754000000 | 11.932825000000 | 17.978192000000 | H  | 0.073066000000  | 4.888007000000  | 17.286918000000 |
| H | -2.892077000000 | 10.458922000000 | 17.650007000000 | H  | 0.405942000000  | 6.043567000000  | 16.188565000000 |
| N | 1.167806000000  | 8.526036000000  | 18.895544000000 | O  | 13.153464000000 | 8.469440000000  | 14.425279000000 |
| C | 1.717588000000  | 8.187921000000  | 20.207090000000 | H  | 12.169233000000 | 8.345863000000  | 14.183200000000 |
| C | 2.173778000000  | 6.708823000000  | 20.325312000000 | H  | 13.730394000000 | 7.942933000000  | 13.844919000000 |
| C | 3.315940000000  | 6.321035000000  | 19.435365000000 | O  | 10.530186000000 | 5.877623000000  | 15.668002000000 |
| N | 3.145278000000  | 5.832779000000  | 18.139765000000 | H  | 9.899409000000  | 6.231633000000  | 16.380592000000 |
| C | 4.680022000000  | 6.354701000000  | 19.642928000000 | H  | 10.488778000000 | 6.444978000000  | 14.864039000000 |
| C | 4.376514000000  | 5.590556000000  | 17.610162000000 | H  | 10.314179000000 | -0.635959000000 | 19.667365000000 |
| N | 5.334969000000  | 5.900193000000  | 18.496849000000 | H  | 2.772693000000  | -0.611468000000 | 21.138147000000 |
| H | 1.804032000000  | 8.815422000000  | 18.148892000000 | H  | -1.475900000000 | 1.775971000000  | 19.551960000000 |
| H | 0.944088000000  | 8.377957000000  | 20.956782000000 | H  | 0.359098000000  | 2.406255000000  | 14.968689000000 |
| H | 1.305431000000  | 6.069543000000  | 20.128702000000 | H  | 5.931590000000  | -2.359160000000 | 16.028860000000 |
| H | 2.467551000000  | 6.539723000000  | 21.369260000000 | H  | 7.506748000000  | -2.729663000000 | 15.298453000000 |
| H | 5.240151000000  | 6.686692000000  | 20.499669000000 | H  | -4.556338000000 | 6.006714000000  | 18.860998000000 |
| H | 4.545627000000  | 5.216675000000  | 16.616944000000 | H  | -4.544173000000 | 6.618325000000  | 20.522263000000 |
| H | 2.228460000000  | 5.722347000000  | 17.655385000000 | H  | 2.565843000000  | 8.851496000000  | 20.401947000000 |
| C | 10.555236000000 | 0.070188000000  | 18.863576000000 | H  | -3.531426000000 | 7.023828000000  | 14.611957000000 |
| C | 10.228061000000 | 1.505743000000  | 19.300338000000 | H  | 6.663569000000  | 6.244772000000  | 12.487940000000 |
| N | 10.507464000000 | 2.507006000000  | 18.261722000000 | H  | 3.410244000000  | 11.443058000000 | 17.161601000000 |
| C | 11.719374000000 | 3.013220000000  | 18.002771000000 | H  | 6.602731000000  | 16.929313000000 | 20.095782000000 |
| N | 12.808307000000 | 2.626721000000  | 18.716689000000 | H  | 9.656820000000  | 10.778465000000 | 12.594879000000 |
| N | 11.901452000000 | 3.917122000000  | 17.022513000000 | H  | 15.242266000000 | 4.265962000000  | 20.240391000000 |
| H | 11.618624000000 | -0.034256000000 | 18.624355000000 | H  | 10.775320000000 | 3.710792000000  | 24.562196000000 |
| H | 9.976044000000  | -0.204509000000 | 17.975517000000 | H  | 13.518943000000 | 13.806991000000 | 14.776369000000 |

|                                                                 |                 |                 |                 |   |                 |                 |                 |
|-----------------------------------------------------------------|-----------------|-----------------|-----------------|---|-----------------|-----------------|-----------------|
| H                                                               | 8.953641000000  | 13.145720000000 | 17.076917000000 | H | 5.736647000000  | 12.236763000000 | 16.440168000000 |
| H                                                               | 9.073013000000  | 19.706165000000 | 24.214464000000 | H | 5.952793000000  | 8.251818000000  | 15.772733000000 |
| H                                                               | 8.049148000000  | 5.335435000000  | 24.005269000000 | H | 7.549556000000  | 9.102029000000  | 19.576304000000 |
| <b><sup>5</sup>P<sub>C3</sub> – VioC WT product bound state</b> |                 |                 |                 |   |                 |                 |                 |
| C                                                               | 11.472712000000 | 4.312122000000  | 25.449259000000 | H | 6.808567000000  | 11.340121000000 | 18.567818000000 |
| C                                                               | 11.554598000000 | 5.688606000000  | 24.810690000000 | N | 3.478347000000  | 9.516965000000  | 14.500824000000 |
| O                                                               | 11.419730000000 | 5.860027000000  | 23.572714000000 | C | 3.200469000000  | 8.178597000000  | 13.974248000000 |
| C                                                               | 12.813845000000 | 3.533808000000  | 25.550104000000 | C | 4.561420000000  | 7.691534000000  | 13.438198000000 |
| O                                                               | 13.392709000000 | 3.289181000000  | 24.239849000000 | O | 5.367814000000  | 8.529816000000  | 12.943116000000 |
| C                                                               | 12.604191000000 | 2.177749000000  | 26.223842000000 | C | 2.069322000000  | 8.214638000000  | 12.905621000000 |
| H                                                               | 11.045237000000 | 4.389818000000  | 26.457816000000 | O | 0.864398000000  | 8.773561000000  | 13.478457000000 |
| H                                                               | 13.527033000000 | 4.130953000000  | 26.136712000000 | C | 1.804782000000  | 6.841619000000  | 12.278030000000 |
| H                                                               | 14.079464000000 | 3.991398000000  | 24.040832000000 | H | 4.109874000000  | 10.056174000000 | 13.918689000000 |
| H                                                               | 13.558617000000 | 1.648048000000  | 26.293647000000 | H | 2.871708000000  | 7.555856000000  | 14.811696000000 |
| H                                                               | 12.186939000000 | 2.289939000000  | 27.231330000000 | H | 2.368954000000  | 8.927637000000  | 12.129962000000 |
| H                                                               | 11.917650000000 | 1.566059000000  | 25.627502000000 | H | 0.375133000000  | 8.110751000000  | 14.026820000000 |
| N                                                               | 11.789613000000 | 6.758836000000  | 25.634690000000 | H | 0.962057000000  | 6.921134000000  | 11.584740000000 |
| C                                                               | 11.702745000000 | 8.142029000000  | 25.124275000000 | H | 2.676392000000  | 6.476198000000  | 11.724727000000 |
| C                                                               | 12.834096000000 | 8.445040000000  | 24.129327000000 | H | 1.551965000000  | 6.099500000000  | 13.045215000000 |
| O                                                               | 12.662717000000 | 9.233392000000  | 23.164556000000 | N | 4.882437000000  | 6.390328000000  | 13.609441000000 |
| C                                                               | 11.668897000000 | 9.152355000000  | 26.295492000000 | C | 6.273187000000  | 5.933379000000  | 13.429616000000 |
| C                                                               | 10.515422000000 | 8.937458000000  | 27.311556000000 | C | 6.400491000000  | 4.427233000000  | 13.703171000000 |
| C                                                               | 10.615068000000 | 9.991744000000  | 28.434261000000 | C | 7.800763000000  | 4.006620000000  | 14.203385000000 |
| C                                                               | 9.131381000000  | 8.997084000000  | 26.634115000000 | C | 7.992021000000  | 4.176149000000  | 15.712590000000 |
| H                                                               | 11.771815000000 | 6.630941000000  | 26.636916000000 | O | 8.329808000000  | 3.163533000000  | 16.394839000000 |
| H                                                               | 10.785455000000 | 8.235187000000  | 24.534901000000 | O | 7.839291000000  | 5.391441000000  | 16.199371000000 |
| H                                                               | 12.634206000000 | 9.123517000000  | 26.822654000000 | H | 4.197670000000  | 5.720627000000  | 13.955998000000 |
| H                                                               | 11.562029000000 | 10.155043000000 | 25.867011000000 | H | 6.907476000000  | 6.485356000000  | 14.130957000000 |
| H                                                               | 10.635108000000 | 7.940273000000  | 27.777331000000 | H | 6.166330000000  | 3.866598000000  | 12.787404000000 |
| H                                                               | 8.983756000000  | 8.175888000000  | 25.920047000000 | H | 5.659713000000  | 4.125830000000  | 14.451424000000 |
| H                                                               | 9.015054000000  | 9.951279000000  | 26.104864000000 | H | 7.980705000000  | 2.953540000000  | 13.974772000000 |
| H                                                               | 8.338388000000  | 8.922146000000  | 27.388311000000 | H | 8.579940000000  | 4.592882000000  | 13.698154000000 |
| H                                                               | 11.609412000000 | 9.983717000000  | 28.901782000000 | C | 6.686351000000  | -2.136340000000 | 15.557936000000 |
| H                                                               | 10.416659000000 | 10.994446000000 | 28.033751000000 | C | 7.188586000000  | -0.746277000000 | 15.992492000000 |
| H                                                               | 9.874690000000  | 9.784273000000  | 29.217327000000 | C | 8.358788000000  | -0.268126000000 | 15.111132000000 |
| N                                                               | 14.027026000000 | 7.835062000000  | 24.358453000000 | C | 6.046846000000  | 0.289391000000  | 15.993067000000 |
| C                                                               | 15.044257000000 | 7.702724000000  | 23.303383000000 | H | 6.305284000000  | -2.104485000000 | 14.527409000000 |
| C                                                               | 15.043865000000 | 6.214319000000  | 22.953137000000 | H | 7.559912000000  | -0.829229000000 | 17.026750000000 |
| O                                                               | 15.040727000000 | 5.355027000000  | 23.904340000000 | H | 9.201646000000  | -0.969630000000 | 15.152980000000 |
| C                                                               | 16.438034000000 | 8.260005000000  | 23.712352000000 | H | 8.042335000000  | -0.192826000000 | 14.060577000000 |
| C                                                               | 16.376399000000 | 9.795262000000  | 23.821412000000 | H | 8.708038000000  | 0.719124000000  | 15.432566000000 |
| C                                                               | 16.986724000000 | 7.632179000000  | 25.008013000000 | H | 6.415588000000  | 1.266663000000  | 16.323151000000 |
| H                                                               | 14.061887000000 | 7.119857000000  | 25.074605000000 | H | 5.227272300000  | -0.022902000000 | 16.654316000000 |
| H                                                               | 14.677138000000 | 8.275879000000  | 22.446986000000 | H | 5.636601000000  | 0.406617000000  | 14.978462000000 |
| H                                                               | 17.117549000000 | 7.997758000000  | 22.886374000000 | C | -3.877285000000 | 6.042776000000  | 19.897527000000 |
| H                                                               | 17.013803000000 | 6.540309000000  | 24.951818000000 | C | -3.576187000000 | 4.615027000000  | 20.385172000000 |
| H                                                               | 18.001303000000 | 7.996360000000  | 25.202130000000 | C | -2.732178000000 | 4.555632000000  | 21.682895000000 |
| H                                                               | 16.363946000000 | 7.914983000000  | 25.865888000000 | C | -2.777483000000 | 3.144935000000  | 22.304253000000 |
| H                                                               | 17.361424000000 | 10.202900000000 | 24.077389000000 | C | -1.275327000000 | 5.000450000000  | 21.441588000000 |
| H                                                               | 15.669790000000 | 10.097196000000 | 24.602665000000 | H | -2.959433000000 | 6.600516000000  | 19.683195000000 |
| H                                                               | 16.050122000000 | 10.252136000000 | 22.880610000000 | H | -4.526368000000 | 4.086903000000  | 20.557761000000 |
| N                                                               | 14.969314000000 | 5.876873000000  | 21.661672000000 | H | -3.045815000000 | 4.064158000000  | 19.593336000000 |
| C                                                               | 14.671323000000 | 4.493417000000  | 21.277055000000 | H | -3.185313000000 | 5.251330000000  | 22.408102000000 |
| C                                                               | 13.152086000000 | 4.258534000000  | 21.386957000000 | H | -2.197159000000 | 3.101343000000  | 23.234427000000 |
| O                                                               | 12.849227000000 | 2.828516000000  | 21.463401000000 | H | -3.805986000000 | 2.838465000000  | 22.531951000000 |
| H                                                               | 14.758823000000 | 6.575842000000  | 20.923715000000 | H | -2.357542000000 | 2.398991000000  | 21.613157000000 |
| H                                                               | 15.204101000000 | 3.809047000000  | 21.941988000000 | H | -1.212293000000 | 6.020298000000  | 21.049654000000 |
| H                                                               | 12.744652000000 | 4.761486000000  | 22.262555000000 | H | -0.694811000000 | 4.954717000000  | 22.372365000000 |
| H                                                               | 12.643746000000 | 4.650562000000  | 20.506867000000 | H | -0.795610000000 | 4.341440000000  | 20.702520000000 |
| H                                                               | 12.898814000000 | 2.583556000000  | 22.419931000000 | C | 8.815023000000  | 11.132600000000 | 13.104866000000 |
| C                                                               | 3.825764000000  | 11.240320000000 | 16.194354000000 | C | 8.954854000000  | 12.412456000000 | 13.929980000000 |
| C                                                               | 3.215897000000  | 9.913247000000  | 15.766892000000 | O | 8.723915000000  | 13.524625000000 | 13.396789000000 |
| O                                                               | 2.532939000000  | 9.205270000000  | 16.559883000000 | C | 8.528726000000  | 9.805368000000  | 13.855369000000 |
| C                                                               | 5.380390000000  | 11.261505000000 | 16.090408000000 | C | 9.758280000000  | 9.193552000000  | 14.498638000000 |
| C                                                               | 6.049117000000  | 10.178259000000 | 16.882197000000 | O | 10.037825000000 | 9.504390000000  | 15.729068000000 |
| N                                                               | 6.599277000000  | 10.405090000000 | 18.140152000000 | O | 10.497810000000 | 8.397365000000  | 13.791845000000 |
| C                                                               | 6.229706000000  | 8.830034000000  | 16.635448000000 | H | 8.001481000000  | 11.323772000000 | 12.398860000000 |
| C                                                               | 7.081633000000  | 9.230418000000  | 18.616878000000 | H | 7.772043000000  | 9.964626000000  | 14.626758000000 |
| N                                                               | 6.882618000000  | 8.251134000000  | 17.720177000000 | H | 8.123333000000  | 9.088612000000  | 13.136999000000 |
| H                                                               | 3.415110000000  | 12.049443000000 | 15.575679000000 | N | 9.379914000000  | 12.285565000000 | 15.225743000000 |
| H                                                               | 5.679362000000  | 11.188031000000 | 15.037579000000 | C | 9.656481000000  | 13.447051000000 | 16.067383000000 |
|                                                                 |                 |                 |                 | C | 11.146946000000 | 13.713185000000 | 16.304296000000 |



|   |                 |                 |                 |   |                 |                 |                 |
|---|-----------------|-----------------|-----------------|---|-----------------|-----------------|-----------------|
| O | 11.511081000000 | 14.612241000000 | 17.104129000000 | H | 6.720708000000  | 0.166461000000  | 19.926780000000 |
| H | 9.521284000000  | 11.358301000000 | 15.626013000000 | H | 6.688717000000  | 1.774059000000  | 20.670956000000 |
| H | 9.232242000000  | 14.325064000000 | 15.571287000000 | H | 3.180948000000  | 2.523576000000  | 19.198288000000 |
| N | 12.011457000000 | 12.932598000000 | 15.611765000000 | H | 4.912835000000  | 2.621487000000  | 19.506230000000 |
| C | 13.462844000000 | 13.024916000000 | 15.702663000000 | H | 3.772172000000  | 2.898105000000  | 20.826160000000 |
| C | 14.051243000000 | 11.626413000000 | 15.534606000000 | N | 0.465279000000  | 1.225274000000  | 19.961150000000 |
| O | 13.522225000000 | 11.093868000000 | 14.296114000000 | C | -0.643003000000 | 1.359276000000  | 19.007643000000 |
| H | 11.667381000000 | 12.257128000000 | 14.942068000000 | C | -0.298945000000 | 2.273956000000  | 17.826666000000 |
| H | 13.729418000000 | 13.461241000000 | 16.669370000000 | O | -0.815755000000 | 3.425697000000  | 17.733957000000 |
| H | 13.763070000000 | 10.999408000000 | 16.392403000000 | H | 0.447599000000  | 1.794937000000  | 20.794706000000 |
| H | 15.149524000000 | 11.683596000000 | 15.507614000000 | H | -0.906720000000 | 0.360955000000  | 18.643152000000 |
| H | 13.485217000000 | 10.100680000000 | 14.296533000000 | N | 0.578345000000  | 1.755491000000  | 16.940690000000 |
| C | 6.369168000000  | 15.985379000000 | 20.390722000000 | C | 1.065296000000  | 2.481523000000  | 15.762656000000 |
| C | 6.333665000000  | 16.148996000000 | 21.909456000000 | C | 2.467165000000  | 1.986146000000  | 15.373738000000 |
| O | 6.613726000000  | 17.252633000000 | 22.458229000000 | C | 3.067865000000  | 2.871440000000  | 14.296430000000 |
| C | 7.394216000000  | 14.987909000000 | 19.799020000000 | O | 3.130991000000  | 4.120695000000  | 14.437002000000 |
| C | 7.032649000000  | 13.508268000000 | 19.868886000000 | N | 3.537606000000  | 2.246686000000  | 13.184661000000 |
| O | 7.604020000000  | 12.723978000000 | 19.000263000000 | H | 0.977319000000  | 0.844329000000  | 17.179896000000 |
| O | 6.250291000000  | 13.064141000000 | 20.786093000000 | H | 1.112296000000  | 3.549396000000  | 15.986889000000 |
| H | 5.362404000000  | 15.709921000000 | 20.049173000000 | H | 2.441186000000  | 5.037045000000  | 15.056495000000 |
| H | 7.559545000000  | 15.230466000000 | 18.744396000000 | H | 3.124817000000  | 2.045788000000  | 16.250302000000 |
| H | 8.373996000000  | 15.118620000000 | 20.280124000000 | H | 3.514585000000  | 1.244716000000  | 13.082984000000 |
| N | 5.943627000000  | 15.060718000000 | 22.628015000000 | H | 3.977519000000  | 2.794914000000  | 12.459870000000 |
| C | 5.612376000000  | 15.146733000000 | 24.047255000000 | C | -3.051942000000 | 6.569723000000  | 15.532682000000 |
| C | 6.778312000000  | 15.397760000000 | 25.012013000000 | C | -1.719341000000 | 7.242928000000  | 15.809922000000 |
| O | 6.548164000000  | 15.813542000000 | 26.169119000000 | O | -0.710732000000 | 7.016759000000  | 15.057928000000 |
| H | 5.828583000000  | 14.186407000000 | 22.099423000000 | C | -2.888628000000 | 5.098643000000  | 15.116672000000 |
| H | 4.906546000000  | 15.964988000000 | 24.223371000000 | H | -3.705899000000 | 6.655014000000  | 16.408860000000 |
| H | 5.123494000000  | 14.211245000000 | 24.337593000000 | H | -2.445983000000 | 4.505553000000  | 15.924191000000 |
| N | 8.020924000000  | 15.135519000000 | 24.522512000000 | H | -3.861983000000 | 4.665168000000  | 14.863821000000 |
| C | 9.260149000000  | 15.386523000000 | 25.258194000000 | H | -2.235819000000 | 5.027245000000  | 14.242054000000 |
| C | 9.870945000000  | 16.767440000000 | 24.934747000000 | N | -1.659529000000 | 8.070783000000  | 16.869215000000 |
| O | 11.015041000000 | 17.061550000000 | 25.373074000000 | C | -0.455921000000 | 8.805660000000  | 17.273937000000 |
| C | 10.288588000000 | 14.271058000000 | 24.979006000000 | C | -0.046581000000 | 8.330225000000  | 18.674656000000 |
| C | 9.897053000000  | 12.938198000000 | 25.640788000000 | O | -0.913602000000 | 7.908976000000  | 19.492960000000 |
| O | 9.962214000000  | 12.865872000000 | 26.898664000000 | C | -0.672649000000 | 10.352179000000 | 17.223175000000 |
| O | 9.521211000000  | 11.960572000000 | 24.843684000000 | C | -0.920231000000 | 10.820630000000 | 15.776832000000 |
| H | 8.094378000000  | 14.768901000000 | 23.582893000000 | C | -1.789290000000 | 10.833345000000 | 18.169943000000 |
| H | 9.015784000000  | 15.379888000000 | 26.326332000000 | H | -2.417987000000 | 8.071359000000  | 17.539734000000 |
| H | 10.413463000000 | 14.141556000000 | 23.896817000000 | H | 0.335304000000  | 8.558785000000  | 16.565825000000 |
| H | 11.241565000000 | 14.604251000000 | 25.399004000000 | H | 0.279437000000  | 10.781264000000 | 17.563992000000 |
| N | 9.128966000000  | 17.612285000000 | 24.171498000000 | H | -0.141266000000 | 10.465804000000 | 15.093254000000 |
| C | 9.625163000000  | 18.923358000000 | 23.756891000000 | H | -0.948086000000 | 11.916166000000 | 15.733590000000 |
| C | 9.640321000000  | 19.088438000000 | 22.225085000000 | H | -1.885874000000 | 10.452429000000 | 15.407164000000 |
| C | 10.475291000000 | 18.077434000000 | 21.451403000000 | H | -1.637153000000 | 10.487553000000 | 19.197188000000 |
| C | 11.609140000000 | 17.449630000000 | 21.996469000000 | H | -1.828547000000 | 11.928621000000 | 18.177896000000 |
| C | 10.107885000000 | 17.756771000000 | 20.130402000000 | H | -2.772349000000 | 10.476849000000 | 17.834123000000 |
| C | 12.346459000000 | 16.528291000000 | 21.239576000000 | N | 1.269358000000  | 8.447551000000  | 18.956204000000 |
| C | 10.841621000000 | 16.836874000000 | 19.373931000000 | C | 1.834722000000  | 8.063840000000  | 20.249003000000 |
| C | 11.967351000000 | 16.215926000000 | 19.930033000000 | C | 2.270407000000  | 6.575382000000  | 20.317168000000 |
| H | 8.216670000000  | 17.333402000000 | 23.820539000000 | C | 3.390932000000  | 6.199472000000  | 19.395385000000 |
| H | 10.621912000000 | 19.035424000000 | 24.190009000000 | N | 3.191982000000  | 5.772717000000  | 18.082408000000 |
| H | 8.605635000000  | 19.034372000000 | 21.862964000000 | C | 4.758555000000  | 6.201786000000  | 19.582489000000 |
| H | 9.994504000000  | 20.109416000000 | 22.007273000000 | C | 4.411625000000  | 5.539414000000  | 17.522694000000 |
| H | 11.901082000000 | 17.640647000000 | 23.024062000000 | N | 5.391739000000  | 5.793335000000  | 18.404660000000 |
| H | 9.229215000000  | 18.231570000000 | 19.698474000000 | H | 1.897419000000  | 8.753914000000  | 18.209845000000 |
| H | 13.210410000000 | 16.044489000000 | 21.686893000000 | H | 1.076378000000  | 8.244223000000  | 21.016318000000 |
| H | 10.546340000000 | 16.572647000000 | 18.364569000000 | H | 1.388792000000  | 5.954640000000  | 20.119421000000 |
| H | 12.514344000000 | 15.492041000000 | 19.336601000000 | H | 2.581604000000  | 6.372869000000  | 21.349914000000 |
| C | 2.594152000000  | 0.314331000000  | 20.791321000000 | H | 5.340763000000  | 6.484031000000  | 20.443185000000 |
| C | 1.528441000000  | 0.402908000000  | 19.721330000000 | H | 4.545941000000  | 5.208877000000  | 16.508596000000 |
| O | 1.617734000000  | -0.243248000000 | 18.638121000000 | H | 2.267293000000  | 5.691569000000  | 17.607893000000 |
| C | 3.983857000000  | 0.789691000000  | 20.281111000000 | C | 10.770714000000 | 0.072156000000  | 18.871798000000 |
| C | 5.068603000000  | 0.445011000000  | 21.328721000000 | C | 10.229211000000 | 1.466832000000  | 19.219057000000 |
| C | 3.961665000000  | 2.289664000000  | 19.931845000000 | N | 10.400524000000 | 2.438096000000  | 18.129826000000 |
| C | 6.507598000000  | 0.710085000000  | 20.856298000000 | C | 11.522582000000 | 3.140902000000  | 17.918070000000 |
| H | 2.309058000000  | 0.891086000000  | 21.681173000000 | N | 12.624515000000 | 2.980124000000  | 18.684559000000 |
| H | 4.197012000000  | 0.217343000000  | 19.366026000000 | N | 11.599695000000 | 4.031361000000  | 16.910650000000 |
| H | 4.970452000000  | -0.617249000000 | 21.597935000000 | H | 11.845579000000 | 0.108317000000  | 18.664784000000 |
| H | 4.872779000000  | 1.017709000000  | 22.248330000000 | H | 10.266003000000 | -0.328869000000 | 17.986103000000 |
| H | 7.229592000000  | 0.378416000000  | 21.611410000000 | H | 9.154831000000  | 1.420546000000  | 19.416045000000 |

|    |                 |                 |                 |   |                |                 |                 |
|----|-----------------|-----------------|-----------------|---|----------------|-----------------|-----------------|
| H  | 10.700260000000 | 1.846527000000  | 20.134076000000 | H | 8.989602000000 | 19.709546000000 | 24.186898000000 |
| H  | 9.561595000000  | 2.733699000000  | 17.614853000000 | H | 8.209339000000 | 4.936269000000  | 23.934940000000 |
| H  | 12.599364000000 | 2.552998000000  | 19.611947000000 |   |                |                 |                 |
| H  | 13.375291000000 | 3.641943000000  | 18.518626000000 |   |                |                 |                 |
| H  | 10.839107000000 | 4.202543000000  | 16.269857000000 |   |                |                 |                 |
| H  | 12.313504000000 | 4.759983000000  | 16.987736000000 |   |                |                 |                 |
| Fe | 7.510367000000  | 6.261954000000  | 18.099125000000 |   |                |                 |                 |
| O  | 8.528844000000  | 4.936263000000  | 19.385436000000 |   |                |                 |                 |
| O  | 9.656926000000  | 7.584867000000  | 17.978070000000 |   |                |                 |                 |
| C  | 8.265598000000  | 5.561999000000  | 20.504240000000 |   |                |                 |                 |
| O  | 7.653365000000  | 6.695364000000  | 20.456971000000 |   |                |                 |                 |
| C  | 8.699343000000  | 4.949826000000  | 21.814582000000 |   |                |                 |                 |
| C  | 7.822992000000  | 5.365554000000  | 23.003620000000 |   |                |                 |                 |
| H  | 8.715989000000  | 3.861426000000  | 21.686240000000 |   |                |                 |                 |
| H  | 9.736932000000  | 5.253168000000  | 22.014787000000 |   |                |                 |                 |
| H  | 6.787321000000  | 5.027784000000  | 22.875454000000 |   |                |                 |                 |
| H  | 7.807362000000  | 6.454266000000  | 23.103770000000 |   |                |                 |                 |
| N  | 11.933983000000 | 7.785457000000  | 16.677125000000 |   |                |                 |                 |
| C  | 12.144188000000 | 7.921532000000  | 18.152545000000 |   |                |                 |                 |
| C  | 13.258928000000 | 6.967884000000  | 18.645180000000 |   |                |                 |                 |
| O  | 13.410652000000 | 5.855797000000  | 18.014758000000 |   |                |                 |                 |
| C  | 10.795127000000 | 7.635506000000  | 18.913391000000 |   |                |                 |                 |
| C  | 10.547520000000 | 8.582776000000  | 20.103870000000 |   |                |                 |                 |
| C  | 10.502408000000 | 10.101145000000 | 19.758669000000 |   |                |                 |                 |
| N  | 9.445431000000  | 10.856364000000 | 20.454448000000 |   |                |                 |                 |
| C  | 9.450754000000  | 11.149286000000 | 21.785050000000 |   |                |                 |                 |
| N  | 10.427878000000 | 10.769683000000 | 22.610196000000 |   |                |                 |                 |
| N  | 8.438604000000  | 11.865307000000 | 22.314407000000 |   |                |                 |                 |
| O  | 13.892724000000 | 7.376072000000  | 19.674279000000 |   |                |                 |                 |
| H  | 12.477034000000 | 8.945455000000  | 18.336101000000 |   |                |                 |                 |
| H  | 9.478539000000  | 8.433901000000  | 17.514835000000 |   |                |                 |                 |
| H  | 10.816274000000 | 6.608794000000  | 19.283610000000 |   |                |                 |                 |
| H  | 11.334054000000 | 8.389359000000  | 20.843000000000 |   |                |                 |                 |
| H  | 9.596428000000  | 8.282875000000  | 20.554190000000 |   |                |                 |                 |
| H  | 10.296496000000 | 10.248738000000 | 18.692698000000 |   |                |                 |                 |
| H  | 11.480156000000 | 10.562087000000 | 19.954945000000 |   |                |                 |                 |
| H  | 8.817008000000  | 11.424670000000 | 19.879841000000 |   |                |                 |                 |
| H  | 11.238874000000 | 10.206755000000 | 22.382388000000 |   |                |                 |                 |
| H  | 10.328344000000 | 11.097646000000 | 23.588110000000 |   |                |                 |                 |
| H  | 7.595085000000  | 12.094278000000 | 21.792699000000 |   |                |                 |                 |
| H  | 8.527979000000  | 12.071534000000 | 23.322256000000 |   |                |                 |                 |
| H  | 12.801181000000 | 7.842723000000  | 16.122217000000 |   |                |                 |                 |
| H  | 11.302852000000 | 8.553281000000  | 16.319231000000 |   |                |                 |                 |
| H  | 11.435946000000 | 6.909403000000  | 16.394986000000 |   |                |                 |                 |
| O  | 0.762924000000  | 5.543922000000  | 16.939254000000 |   |                |                 |                 |
| H  | 0.097769000000  | 4.889068000000  | 17.264003000000 |   |                |                 |                 |
| H  | 0.414814000000  | 6.060828000000  | 16.177280000000 |   |                |                 |                 |
| O  | 13.093376000000 | 8.405717000000  | 14.238167000000 |   |                |                 |                 |
| H  | 12.106759000000 | 8.401873000000  | 13.991345000000 |   |                |                 |                 |
| H  | 13.620992000000 | 7.905928000000  | 13.591079000000 |   |                |                 |                 |
| O  | 10.352152000000 | 6.041019000000  | 15.252770000000 |   |                |                 |                 |
| H  | 9.450668000000  | 6.040068000000  | 15.663700000000 |   |                |                 |                 |
| H  | 10.385414000000 | 6.698121000000  | 14.513894000000 |   |                |                 |                 |
| H  | 10.607964000000 | -0.618720000000 | 19.707686000000 |   |                |                 |                 |
| H  | 2.665362000000  | -0.739106000000 | 21.090891000000 |   |                |                 |                 |
| H  | -1.498110000000 | 1.793438000000  | 19.523677000000 |   |                |                 |                 |
| H  | 0.368836000000  | 2.344255000000  | 14.923716000000 |   |                |                 |                 |
| H  | 5.873741000000  | -2.488684000000 | 16.205698000000 |   |                |                 |                 |
| H  | 7.492877000000  | -2.879224000000 | 15.591326000000 |   |                |                 |                 |
| H  | -4.489718000000 | 6.018312000000  | 18.985826000000 |   |                |                 |                 |
| H  | -4.439567000000 | 6.603636000000  | 20.655816000000 |   |                |                 |                 |
| H  | 2.696067000000  | 8.708735000000  | 20.448607000000 |   |                |                 |                 |
| H  | -3.534724000000 | 7.130374000000  | 14.719145000000 |   |                |                 |                 |
| H  | 6.614528000000  | 6.181470000000  | 12.418141000000 |   |                |                 |                 |
| H  | 3.518352000000  | 11.416616000000 | 17.227787000000 |   |                |                 |                 |
| H  | 6.592817000000  | 16.981057000000 | 19.999702000000 |   |                |                 |                 |
| H  | 9.726789000000  | 11.023999000000 | 12.500368000000 |   |                |                 |                 |
| H  | 15.027754000000 | 4.340034000000  | 20.255506000000 |   |                |                 |                 |
| H  | 10.787324000000 | 3.720003000000  | 24.835187000000 |   |                |                 |                 |
| H  | 13.856295000000 | 13.681355000000 | 14.914590000000 |   |                |                 |                 |
| H  | 9.170610000000  | 13.336181000000 | 17.044083000000 |   |                |                 |                 |

**VioC MeHis316**

**<sup>5</sup>Re<sub>Me</sub> – VioC MeHis Reactant state**

|   |                 |                 |                 |
|---|-----------------|-----------------|-----------------|
| C | 11.236822000000 | 5.181683000000  | 25.920412000000 |
| C | 11.492137000000 | 6.534536000000  | 25.277240000000 |
| O | 11.297952000000 | 6.740478000000  | 24.054515000000 |
| C | 12.430705000000 | 4.187780000000  | 25.909505000000 |
| O | 12.883186000000 | 3.901690000000  | 24.559054000000 |
| C | 12.037086000000 | 2.860550000000  | 26.556587000000 |
| H | 10.910347000000 | 5.313086000000  | 26.960731000000 |
| H | 13.268670000000 | 4.634332000000  | 26.464649000000 |
| H | 13.632027000000 | 4.524372000000  | 24.322405000000 |
| H | 12.892906000000 | 2.179447000000  | 26.555093000000 |
| H | 11.699429000000 | 3.002838000000  | 27.589688000000 |
| H | 11.227250000000 | 2.391931000000  | 25.986019000000 |
| N | 11.947828000000 | 7.547942000000  | 26.090906000000 |
| C | 12.000596000000 | 8.936123000000  | 25.598123000000 |
| C | 13.179233000000 | 9.171638000000  | 24.637417000000 |
| O | 13.157666000000 | 10.133740000000 | 23.821867000000 |
| C | 11.988599000000 | 9.954289000000  | 26.761161000000 |
| C | 10.818327000000 | 9.800420000000  | 27.769161000000 |
| C | 10.865564000000 | 10.966061000000 | 28.779163000000 |
| C | 9.433225000000  | 9.729237000000  | 27.095946000000 |
| H | 11.983434000000 | 7.401904000000  | 27.090028000000 |
| H | 11.113203000000 | 9.098780000000  | 24.976731000000 |
| H | 12.944038000000 | 9.899859000000  | 27.304626000000 |
| H | 11.937172000000 | 10.952244000000 | 26.310571000000 |
| H | 10.976954000000 | 8.865935000000  | 28.338792000000 |
| H | 9.347384000000  | 8.865726000000  | 26.424113000000 |
| H | 9.214444000000  | 10.643618000000 | 26.526612000000 |
| H | 8.654954000000  | 9.623670000000  | 27.862132000000 |
| H | 11.850725000000 | 11.050904000000 | 29.256263000000 |
| H | 10.640887000000 | 11.912132000000 | 28.273488000000 |
| H | 10.116329000000 | 10.826616000000 | 29.566722000000 |
| N | 14.211968000000 | 8.297923000000  | 24.702312000000 |
| C | 15.125294000000 | 8.055840000000  | 23.570953000000 |
| C | 14.867754000000 | 6.591523000000  | 23.203522000000 |
| O | 14.732793000000 | 5.747264000000  | 24.159736000000 |
| C | 16.615178000000 | 8.377568000000  | 23.883255000000 |
| C | 16.801350000000 | 9.898294000000  | 24.043853000000 |
| C | 17.152767000000 | 7.617868000000  | 25.110381000000 |
| H | 14.114750000000 | 7.504118000000  | 25.325803000000 |
| H | 14.798659000000 | 8.704482000000  | 22.753039000000 |
| H | 17.181518000000 | 8.050761000000  | 22.997234000000 |
| H | 17.020953000000 | 6.536545000000  | 25.012549000000 |
| H | 18.220225000000 | 7.829343000000  | 25.243603000000 |
| H | 16.633619000000 | 7.942622000000  | 26.020452000000 |
| H | 17.856634000000 | 10.138580000000 | 24.217976000000 |
| H | 16.221727000000 | 10.270455000000 | 24.896141000000 |
| H | 16.467823000000 | 10.440712000000 | 23.152549000000 |
| N | 14.720434000000 | 6.257664000000  | 21.919972000000 |
| C | 14.200143000000 | 4.933973000000  | 21.558348000000 |
| C | 12.660231000000 | 4.919650000000  | 21.690474000000 |
| O | 12.173972000000 | 3.547205000000  | 21.859815000000 |
| H | 14.715842000000 | 6.935299000000  | 21.137435000000 |
| H | 14.634075000000 | 4.181127000000  | 22.221465000000 |
| H | 12.334897000000 | 5.525779000000  | 22.537464000000 |
| H | 12.194537000000 | 5.313423000000  | 20.787302000000 |
| H | 12.256718000000 | 3.337451000000  | 22.825497000000 |
| C | 3.662112000000  | 11.039466000000 | 17.518431000000 |
| C | 2.961333000000  | 9.892579000000  | 16.812742000000 |
| O | 2.277079000000  | 9.029203000000  | 17.436723000000 |
| C | 5.212559000000  | 11.008150000000 | 17.368022000000 |
| C | 5.862947000000  | 9.776567000000  | 17.932930000000 |
| N | 6.726393000000  | 9.844249000000  | 19.024796000000 |
| C | 5.770255000000  | 8.433826000000  | 17.615250000000 |
| C | 7.120429000000  | 8.591090000000  | 19.351991000000 |
| N | 6.541106000000  | 7.709261000000  | 18.521710000000 |
| H | 3.296011000000  | 11.994905000000 | 17.120301000000 |
| H | 5.481674000000  | 11.120878000000 | 16.309451000000 |
| H | 5.598520000000  | 11.889901000000 | 17.893085000000 |

|   |                 |                 |                 |
|---|-----------------|-----------------|-----------------|
| H | 5.200472000000  | 7.941869000000  | 16.847518000000 |
| H | 7.787476000000  | 8.331883000000  | 20.154398000000 |
| H | 7.125195000000  | 10.740910000000 | 19.417441000000 |
| N | 3.160399000000  | 9.815500000000  | 15.476657000000 |
| C | 2.833882000000  | 8.654681000000  | 14.640869000000 |
| C | 4.194965000000  | 8.222168000000  | 14.071184000000 |
| O | 4.957399000000  | 9.088996000000  | 13.563575000000 |
| C | 1.788190000000  | 9.013829000000  | 13.551922000000 |
| O | 0.562660000000  | 9.458258000000  | 14.169581000000 |
| C | 1.532874000000  | 7.849923000000  | 12.586014000000 |
| H | 3.761144000000  | 10.492688000000 | 15.020890000000 |
| H | 2.412309000000  | 7.885757000000  | 15.293687000000 |
| H | 2.166463000000  | 9.878572000000  | 12.996787000000 |
| H | 0.040407000000  | 8.691422000000  | 14.522464000000 |
| H | 0.762392000000  | 8.142243000000  | 11.866685000000 |
| H | 2.440396000000  | 7.585309000000  | 12.029545000000 |
| H | 1.169831000000  | 6.971226000000  | 13.133118000000 |
| N | 4.544284000000  | 6.923746000000  | 14.235956000000 |
| C | 5.934298000000  | 6.469054000000  | 14.056810000000 |
| C | 6.010413000000  | 4.935129000000  | 13.986188000000 |
| C | 7.340665000000  | 4.377816000000  | 14.511753000000 |
| C | 7.440555000000  | 4.220519000000  | 16.029507000000 |
| O | 8.340976000000  | 3.464999000000  | 16.484026000000 |
| O | 6.583307000000  | 4.901585000000  | 16.774436000000 |
| H | 3.883220000000  | 6.273175000000  | 14.659028000000 |
| H | 6.531789000000  | 6.831006000000  | 14.902590000000 |
| H | 5.857284000000  | 4.604685000000  | 12.950610000000 |
| H | 5.199724000000  | 4.504589000000  | 14.582526000000 |
| H | 7.553037000000  | 3.393719000000  | 14.081352000000 |
| H | 8.181732000000  | 5.025504000000  | 14.221554000000 |
| C | 6.237856000000  | -1.975038000000 | 15.069163000000 |
| C | 6.534284000000  | -0.571144000000 | 15.631505000000 |
| C | 7.846682000000  | -0.002285000000 | 15.058723000000 |
| C | 5.352562000000  | 0.385501000000  | 15.373952000000 |
| H | 6.111549000000  | -1.935283000000 | 13.978336000000 |
| H | 6.655957000000  | -0.663383000000 | 16.722899000000 |
| H | 8.690896000000  | -0.672656000000 | 15.263678000000 |
| H | 7.772377000000  | 0.111861000000  | 13.967833000000 |
| H | 8.080735000000  | 0.978315000000  | 15.489357000000 |
| H | 5.551836000000  | 1.373865000000  | 15.806642000000 |
| H | 4.424557000000  | -0.004759000000 | 15.810839000000 |
| H | 5.195534000000  | 0.513684000000  | 14.293052000000 |
| C | -4.079581000000 | 4.587411000000  | 19.625016000000 |
| C | -3.735110000000 | 3.091891000000  | 19.731103000000 |
| C | -2.803286000000 | 2.742156000000  | 20.917758000000 |
| C | -2.748776000000 | 1.216751000000  | 21.135512000000 |
| C | -1.384907000000 | 3.313888000000  | 20.718885000000 |
| H | -3.183385000000 | 5.207080000000  | 19.508510000000 |
| H | -4.668859000000 | 2.518894000000  | 19.837898000000 |
| H | -3.261055000000 | 2.750002000000  | 18.799215000000 |
| H | -3.229458000000 | 3.194732000000  | 21.828178000000 |
| H | -2.097857000000 | 0.955639000000  | 21.979823000000 |
| H | -3.745023000000 | 0.804498000000  | 21.336989000000 |
| H | -2.362217000000 | 0.713944000000  | 20.236466000000 |
| H | -1.393019000000 | 4.404385000000  | 20.620756000000 |
| H | -0.736429000000 | 3.054514000000  | 21.566483000000 |
| H | -0.939218000000 | 2.899708000000  | 19.802862000000 |
| C | 8.586310000000  | 11.607403000000 | 13.391310000000 |
| C | 9.294625000000  | 12.898297000000 | 13.804560000000 |
| O | 9.184277000000  | 13.926828000000 | 13.093555000000 |
| C | 8.221127000000  | 10.581790000000 | 14.498033000000 |
| C | 9.407808000000  | 9.758288000000  | 14.971239000000 |
| O | 10.115520000000 | 10.205877000000 | 15.952452000000 |
| O | 9.685080000000  | 8.655297000000  | 14.338942000000 |
| H | 7.671567000000  | 11.924433000000 | 12.881916000000 |
| H | 7.791340000000  | 11.102806000000 | 15.359912000000 |
| H | 7.465937000000  | 9.901281000000  | 14.093875000000 |
| N | 10.072245000000 | 12.858468000000 | 14.932042000000 |
| C | 10.828184000000 | 14.018770000000 | 15.386215000000 |
| C | 12.345068000000 | 13.817249000000 | 15.405077000000 |
| O | 13.075071000000 | 14.552130000000 | 16.119347000000 |

|   |                 |                 |                 |   |                 |                 |                 |
|---|-----------------|-----------------|-----------------|---|-----------------|-----------------|-----------------|
| H | 10.107180000000 | 12.006316000000 | 15.497718000000 | H | 6.461067000000  | 1.266784000000  | 20.189911000000 |
| H | 10.587942000000 | 14.848096000000 | 14.711969000000 | H | 3.183501000000  | 1.794108000000  | 18.217317000000 |
| N | 12.824287000000 | 12.838954000000 | 14.600109000000 | H | 4.792594000000  | 2.057710000000  | 18.895882000000 |
| C | 14.232185000000 | 12.475710000000 | 14.495815000000 | H | 3.382030000000  | 2.074805000000  | 19.962535000000 |
| C | 14.353993000000 | 10.953414000000 | 14.491223000000 | N | 0.359661000000  | -0.131154000000 | 18.604707000000 |
| O | 13.507679000000 | 10.457324000000 | 13.428201000000 | C | -0.677944000000 | -0.110985000000 | 17.564348000000 |
| H | 12.190740000000 | 12.268221000000 | 14.055098000000 | C | -0.654707000000 | 1.160088000000  | 16.707605000000 |
| H | 14.767088000000 | 12.922994000000 | 15.338072000000 | O | -1.553875000000 | 2.033489000000  | 16.796728000000 |
| H | 14.037294000000 | 10.558274000000 | 15.468524000000 | H | 0.089169000000  | 0.114839000000  | 19.546054000000 |
| H | 15.403730000000 | 10.664196000000 | 14.331160000000 | H | -0.543968000000 | -0.992057000000 | 16.927539000000 |
| H | 13.116796000000 | 9.570448000000  | 13.658515000000 | N | 0.406337000000  | 1.265103000000  | 15.865851000000 |
| C | 7.997737000000  | 15.783767000000 | 19.172758000000 | C | 0.605780000000  | 2.467106000000  | 15.055290000000 |
| C | 7.444543000000  | 16.419392000000 | 20.440562000000 | C | 1.996451000000  | 2.450914000000  | 14.392195000000 |
| O | 7.854866000000  | 17.536826000000 | 20.857828000000 | C | 2.442233000000  | 3.855909000000  | 14.027851000000 |
| C | 8.582148000000  | 14.369378000000 | 19.364091000000 | O | 2.654707000000  | 4.718045000000  | 14.926113000000 |
| C | 7.545900000000  | 13.250048000000 | 19.468890000000 | N | 2.607063000000  | 4.140690000000  | 12.713700000000 |
| O | 8.012357000000  | 12.057640000000 | 19.752901000000 | H | 1.126833000000  | 0.544666000000  | 15.922795000000 |
| O | 6.309606000000  | 13.492167000000 | 19.283042000000 | H | 0.507879000000  | 3.349021000000  | 15.695328000000 |
| H | 7.201109000000  | 15.735036000000 | 18.420079000000 | H | 2.005749000000  | 1.785572000000  | 13.521987000000 |
| H | 9.223191000000  | 14.126886000000 | 18.505227000000 | H | 2.733982000000  | 2.066779000000  | 15.107396000000 |
| H | 9.242161000000  | 14.327357000000 | 20.239129000000 | H | 2.440964000000  | 3.459441000000  | 11.990545000000 |
| N | 6.492641000000  | 15.708057000000 | 21.114055000000 | H | 2.902113000000  | 5.069620000000  | 12.444611000000 |
| C | 5.812894000000  | 16.254707000000 | 22.288486000000 | C | -3.018180000000 | 6.149448000000  | 15.530124000000 |
| C | 6.695051000000  | 16.549639000000 | 23.511832000000 | C | -1.830866000000 | 7.010650000000  | 15.938170000000 |
| O | 6.289143000000  | 17.365047000000 | 24.368736000000 | O | -0.934453000000 | 7.315099000000  | 15.098356000000 |
| H | 6.122147000000  | 14.880543000000 | 20.646490000000 | C | -2.601476000000 | 4.887102000000  | 14.756549000000 |
| H | 5.326705000000  | 17.206638000000 | 22.050561000000 | H | -3.617401000000 | 5.880735000000  | 16.407948000000 |
| H | 5.036694000000  | 15.543182000000 | 22.587758000000 | H | -2.126586000000 | 4.153415000000  | 15.416518000000 |
| N | 7.883406000000  | 15.888453000000 | 23.589713000000 | H | -3.479424000000 | 4.409822000000  | 14.307751000000 |
| C | 8.861574000000  | 16.114114000000 | 24.659757000000 | H | -1.905129000000 | 5.157089000000  | 13.956395000000 |
| C | 9.860994000000  | 17.242159000000 | 24.329891000000 | N | -1.820466000000 | 7.439724000000  | 17.223814000000 |
| O | 10.834174000000 | 17.456032000000 | 25.104277000000 | C | -0.768025000000 | 8.266203000000  | 17.816288000000 |
| C | 9.638426000000  | 14.824848000000 | 24.969511000000 | C | -0.355780000000 | 7.613592000000  | 19.140812000000 |
| C | 8.790783000000  | 13.747950000000 | 25.673323000000 | O | -1.161028000000 | 6.877016000000  | 19.783804000000 |
| O | 7.951833000000  | 14.094214000000 | 26.540805000000 | C | -1.216450000000 | 9.750552000000  | 18.047225000000 |
| O | 9.047360000000  | 12.502781000000 | 25.304911000000 | C | -1.490425000000 | 10.461325000000 | 16.709663000000 |
| H | 8.109808000000  | 15.212645000000 | 22.872315000000 | C | -2.427201000000 | 9.860704000000  | 18.993834000000 |
| H | 8.302639000000  | 16.401119000000 | 25.556679000000 | H | -2.480877000000 | 7.050071000000  | 17.885450000000 |
| H | 10.084491000000 | 14.418075000000 | 24.053509000000 | H | 0.083017000000  | 8.275841000000  | 17.131337000000 |
| H | 10.467342000000 | 15.104295000000 | 25.630522000000 | H | -0.355240000000 | 10.239783000000 | 18.524121000000 |
| N | 9.665086000000  | 17.940882000000 | 23.183042000000 | H | -0.626355000000 | 10.425832000000 | 16.038832000000 |
| C | 10.589164000000 | 18.982451000000 | 22.736405000000 | H | -1.743157000000 | 11.513240000000 | 16.890013000000 |
| C | 11.037959000000 | 18.781039000000 | 21.278296000000 | H | -2.341829000000 | 10.002081000000 | 16.192095000000 |
| C | 11.814332000000 | 17.507840000000 | 20.966673000000 | H | -2.255188000000 | 9.359008000000  | 19.951731000000 |
| C | 12.446233000000 | 16.732594000000 | 21.954077000000 | H | -2.650259000000 | 10.914586000000 | 19.195572000000 |
| C | 11.927947000000 | 17.096972000000 | 19.623659000000 | H | -3.320766000000 | 9.417705000000  | 18.535977000000 |
| C | 13.169756000000 | 15.584569000000 | 21.601210000000 | N | 0.891251000000  | 7.903755000000  | 19.577151000000 |
| C | 12.653893000000 | 15.956014000000 | 19.264023000000 | C | 1.373942000000  | 7.479521000000  | 20.892082000000 |
| C | 13.278935000000 | 15.195269000000 | 20.262097000000 | C | 1.849227000000  | 6.001998000000  | 20.961725000000 |
| H | 8.875480000000  | 17.736863000000 | 22.576216000000 | C | 2.974451000000  | 5.669915000000  | 20.031820000000 |
| H | 11.432326000000 | 18.980922000000 | 23.431789000000 | N | 2.797956000000  | 5.143701000000  | 18.741610000000 |
| H | 10.147813000000 | 18.810307000000 | 20.636686000000 | C | 4.332989000000  | 5.846643000000  | 20.173327000000 |
| H | 11.650124000000 | 19.653925000000 | 20.999497000000 | C | 4.022761000000  | 5.022294000000  | 18.157224000000 |
| H | 12.364704000000 | 17.003595000000 | 23.001849000000 | N | 4.970893000000  | 5.440257000000  | 19.003396000000 |
| H | 11.442651000000 | 17.687507000000 | 18.849237000000 | H | 1.520623000000  | 8.417385000000  | 18.951676000000 |
| H | 13.643842000000 | 14.994371000000 | 22.380528000000 | H | 0.565721000000  | 7.611208000000  | 21.618925000000 |
| H | 12.736263000000 | 15.660317000000 | 18.221075000000 | H | 0.986978000000  | 5.352359000000  | 20.782681000000 |
| H | 13.844433000000 | 14.307991000000 | 19.992141000000 | H | 2.175450000000  | 5.812859000000  | 21.992032000000 |
| C | 2.584781000000  | -0.593077000000 | 19.532108000000 | H | 4.898987000000  | 6.237455000000  | 21.000381000000 |
| C | 1.655382000000  | -0.470893000000 | 18.340165000000 | H | 4.189337000000  | 4.664342000000  | 17.157828000000 |
| O | 2.039472000000  | -0.692133000000 | 17.156295000000 | C | 10.802023000000 | 0.345506000000  | 19.168226000000 |
| C | 3.966610000000  | 0.070856000000  | 19.311290000000 | C | 10.126072000000 | 1.676473000000  | 19.530193000000 |
| C | 4.900334000000  | -0.254366000000 | 20.501509000000 | N | 10.196263000000 | 2.665303000000  | 18.448240000000 |
| C | 3.823679000000  | 1.586522000000  | 19.082852000000 | C | 11.242241000000 | 3.476070000000  | 18.213885000000 |
| C | 6.360564000000  | 0.180904000000  | 20.293509000000 | N | 12.339312000000 | 3.482438000000  | 19.003527000000 |
| H | 2.111382000000  | -0.175646000000 | 20.431620000000 | N | 11.222917000000 | 4.308210000000  | 17.159387000000 |
| H | 4.395846000000  | -0.376615000000 | 18.404028000000 | H | 11.867057000000 | 0.491845000000  | 18.958095000000 |
| H | 4.873672000000  | -1.339393000000 | 20.683157000000 | H | 10.337372000000 | -0.096238000000 | 18.279858000000 |
| H | 4.499870000000  | 0.221312000000  | 21.410374000000 | H | 9.062464000000  | 1.528676000000  | 19.732325000000 |
| H | 6.979656000000  | -0.131003000000 | 21.143112000000 | H | 10.563113000000 | 2.092739000000  | 20.445552000000 |
| H | 6.779843000000  | -0.280378000000 | 19.389912000000 | H | 9.350130000000  | 2.859263000000  | 17.907090000000 |

H 12.305974000000 3.113853000000 19.952575000000  
H 12.999837000000 4.237694000000 18.819290000000  
H 10.407646000000 4.370946000000 16.566024000000  
H 11.861806000000 5.101615000000 17.169998000000  
Fe 6.926344000000 5.700191000000 18.582179000000  
O 7.525440000000 3.985626000000 19.751103000000  
O 8.517512000000 6.008052000000 18.239933000000  
C 7.635158000000 4.684540000000 20.844848000000  
O 7.270947000000 5.924056000000 20.805408000000  
C 8.201274000000 4.055702000000 22.092714000000  
C 7.974859000000 4.877114000000 23.367231000000  
H 7.771063000000 3.049881000000 22.179860000000  
H 9.279619000000 3.912413000000 21.925791000000  
H 6.914177000000 5.109505000000 23.510264000000  
H 8.526587000000 5.820085000000 23.326725000000  
N 11.841042000000 8.337814000000 16.969493000000  
C 12.442504000000 8.532142000000 18.330982000000  
C 13.338677000000 7.334798000000 18.725185000000  
O 13.080508000000 6.190583000000 18.194646000000  
C 11.305320000000 8.732696000000 19.371646000000  
C 11.815925000000 9.325341000000 20.708545000000  
C 11.717713000000 10.864568000000 20.788799000000  
N 10.375029000000 11.353551000000 21.124361000000  
C 9.963044000000 11.649657000000 22.380120000000  
N 10.746206000000 11.568743000000 23.460273000000  
N 8.691002000000 12.074824000000 22.565796000000  
O 14.226846000000 7.590983000000 19.609447000000  
H 13.068575000000 9.428463000000 18.285491000000  
H 10.542836000000 9.393978000000 18.934584000000  
H 10.817758000000 7.762780000000 19.533941000000  
H 12.861047000000 9.030484000000 20.845473000000  
H 11.259973000000 8.896509000000 21.549757000000  
H 12.001292000000 11.317634000000 19.830968000000  
H 12.427180000000 11.238407000000 21.531965000000  
H 9.690691000000 11.543757000000 20.385099000000  
H 11.678967000000 11.159462000000 23.463319000000  
H 10.306695000000 11.928863000000 24.338571000000  
H 8.062417000000 12.102521000000 21.773978000000  
H 8.408514000000 12.250436000000 23.536592000000  
H 12.527157000000 8.230074000000 16.206598000000  
H 11.225513000000 9.147916000000 16.674774000000  
H 11.233151000000 7.487289000000 16.884112000000  
O 12.289294000000 8.181155000000 14.209861000000  
H 11.286286000000 8.351400000000 14.204370000000  
H 12.492701000000 7.324030000000 13.796122000000  
O 9.956180000000 6.548797000000 16.029898000000  
H 9.312520000000 6.408579000000 16.769761000000  
H 9.660549000000 7.229693000000 15.370926000000  
H 10.712507000000 -0.366821000000 19.997457000000  
H 2.730118000000 -1.667038000000 19.718670000000  
H -1.653610000000 -0.159857000000 18.047290000000  
H -0.181713000000 2.543885000000 14.295542000000  
H 5.317716000000 -2.390079000000 15.498711000000  
H 7.058820000000 -2.670077000000 15.284571000000  
H -4.739803000000 4.772958000000 18.767938000000  
H -4.602471000000 4.935423000000 20.525597000000  
H 2.200372000000 8.141564000000 21.166254000000  
H -3.652488000000 6.778310000000 14.889476000000  
H 6.343166000000 6.936447000000 13.156414000000  
H 3.390160000000 10.995108000000 18.575288000000  
H 8.777278000000 16.457535000000 18.811404000000  
H 9.205391000000 11.113224000000 12.628899000000  
H 14.516881000000 4.725302000000 20.534551000000  
H 10.414301000000 4.724072000000 25.363067000000  
H 14.659347000000 12.875238000000 13.566380000000  
H 10.536218000000 14.311833000000 16.400347000000  
H 10.104583000000 19.965728000000 22.816493000000  
H 8.321108000000 4.315389000000 24.242435000000  
C 1.539579000000 4.716941000000 18.121168000000  
H 1.648268000000 4.798976000000 17.039430000000  
H 1.313029000000 3.680296000000 18.391150000000

H 0.721264000000 5.351936000000 18.453081000000  
**<sup>5</sup>TSH<sub>Me</sub> – ViOC MeHis Transition state for HAT**  
C 11.399845000000 4.691605000000 25.900143000000  
C 11.550559000000 5.929575000000 25.029753000000  
O 11.363063000000 5.915964000000 23.787192000000  
C 12.732018000000 4.013577000000 26.320033000000  
O 13.398122000000 3.436836000000 25.171147000000  
C 12.476840000000 2.882527000000 27.317644000000  
H 10.836024000000 4.951825000000 26.806834000000  
H 13.386934000000 4.767226000000 26.784809000000  
H 14.111329000000 4.042506000000 24.825061000000  
H 13.425628000000 2.413691000000 27.594437000000  
H 11.983797000000 3.249247000000 28.225632000000  
H 11.841394000000 2.117384000000 26.857510000000  
N 11.917751000000 7.079099000000 25.686158000000  
C 11.940226000000 8.399526000000 25.032024000000  
C 13.027756000000 8.466479000000 23.948928000000  
O 12.879141000000 9.158708000000 22.905944000000  
C 12.122057000000 9.518009000000 26.089737000000  
C 11.072961000000 9.528784000000 27.233747000000  
C 11.413330000000 10.651890000000 28.236466000000  
C 9.637616000000 9.696788000000 26.697400000000  
H 11.951064000000 7.072021000000 26.696073000000  
H 10.996041000000 8.547152000000 24.498435000000  
H 13.130731000000 9.435819000000 26.520911000000  
H 12.065346000000 10.481880000000 25.572052000000  
H 11.133116000000 8.568443000000 27.781551000000  
H 9.331184000000 8.854156000000 26.063128000000  
H 9.570703000000 10.623814000000 26.115104000000  
H 8.926128000000 9.757718000000 27.530084000000  
H 12.444772000000 10.557952000000 28.603257000000  
H 11.290119000000 11.639733000000 27.772995000000  
H 10.743641000000 10.599968000000 29.104418000000  
N 14.157941000000 7.758509000000 24.187241000000  
C 15.093815000000 7.386312000000 23.116790000000  
C 15.090959000000 5.856395000000 23.119719000000  
O 15.313973200000 5.230613000000 24.232773000000  
C 16.511906000000 8.008754000000 23.274661000000  
C 16.446550000000 9.529469000000 23.037269000000  
C 17.169613000000 7.684387000000 24.629379000000  
H 14.183560000000 7.155972000000 25.001399000000  
H 14.659757000000 7.743835000000 22.177902000000  
H 17.122881000000 7.560513000000 22.475494000000  
H 17.213195000000 6.607343000000 24.815845000000  
H 18.189588000000 8.085785000000 24.656798000000  
H 16.608968000000 8.149549000000 25.449573000000  
H 17.448057000000 9.971164000000 23.099915000000  
H 15.814779000000 10.012322000000 23.791236000000  
H 16.027546000000 9.763386000000 22.052870000000  
N 14.982408000000 5.252795000000 21.929898000000  
C 14.756845000000 3.813260000000 21.799509000000  
C 13.252879000000 3.510169000000 21.903617000000  
O 12.968703000000 2.156883000000 21.397930000000  
H 14.773102000000 5.820604000000 21.085922000000  
H 15.319660000000 3.284156000000 22.574042000000  
H 12.888335000000 3.618507000000 22.927064000000  
H 12.696524000000 4.186295000000 21.253766000000  
H 13.096958000000 1.490957000000 22.099373000000  
C 3.741591000000 11.341967000000 16.859789000000  
C 3.056635000000 10.107475000000 16.294794000000  
O 2.361435000000 9.331228000000 17.011263000000  
C 5.293963000000 11.271297000000 16.736440000000  
C 5.909357000000 10.115388000000 17.467021000000  
N 6.503276000000 10.284371000000 18.713523000000  
C 6.017349000000 8.767285000000 17.179808000000  
C 6.951864000000 9.082644000000 19.146763000000  
N 6.672543000000 8.139015000000 18.235391000000  
H 3.381986000000 12.235824000000 16.332980000000  
H 5.578454000000 11.231229000000 15.678121000000  
H 5.716149000000 12.200019000000 17.136324000000  
H 5.685283000000 8.217200000000 16.317786000000

|   |                 |                 |                 |   |                 |                 |                 |
|---|-----------------|-----------------|-----------------|---|-----------------|-----------------|-----------------|
| H | 7.456795000000  | 8.911696000000  | 20.079994000000 | H | 10.691776000000 | 14.708464000000 | 15.242218000000 |
| H | 6.735834000000  | 11.220548000000 | 19.139581000000 | N | 13.083174000000 | 12.826073000000 | 15.194524000000 |
| N | 3.285200000000  | 9.865217000000  | 14.984324000000 | C | 14.520469000000 | 12.584889000000 | 15.159879000000 |
| C | 2.979195000000  | 8.611741000000  | 14.289843000000 | C | 14.785721000000 | 11.078627000000 | 15.114446000000 |
| C | 4.350437000000  | 8.120553000000  | 13.790784000000 | O | 14.021326000000 | 10.556835000000 | 13.988248000000 |
| O | 5.173263000000  | 8.952483000000  | 13.317557000000 | H | 12.528489000000 | 12.212948000000 | 14.611227000000 |
| C | 1.936162000000  | 8.838775000000  | 13.160789000000 | H | 14.970184000000 | 13.043299000000 | 16.044955000000 |
| O | 0.709192000000  | 9.349577000000  | 13.721065000000 | H | 14.429302000000 | 10.622551000000 | 16.057527000000 |
| C | 1.682881000000  | 7.573368000000  | 12.331566000000 | H | 15.842073000000 | 10.879175000000 | 15.003386000000 |
| H | 3.910658000000  | 10.470659000000 | 14.464944000000 | H | 13.667277000000 | 9.645035000000  | 14.174088000000 |
| H | 2.556223000000  | 7.920077000000  | 15.023067000000 | C | 6.232808000000  | 15.976548000000 | 20.684587000000 |
| H | 2.314779000000  | 9.636666000000  | 12.512716000000 | C | 6.415109000000  | 16.280574000000 | 22.170120000000 |
| H | 0.179588000000  | 8.626125000000  | 14.147547000000 | O | 6.703876000000  | 17.444069000000 | 22.571829000000 |
| H | 0.907411000000  | 7.781475000000  | 11.588623000000 | C | 7.221170000000  | 14.974613000000 | 20.039421000000 |
| H | 2.589586000000  | 7.252486000000  | 11.804232000000 | C | 6.947365000000  | 13.491740000000 | 20.278997000000 |
| H | 1.329486000000  | 6.758695000000  | 12.974832000000 | O | 7.405236000000  | 12.666060000000 | 19.387223000000 |
| N | 4.647951000000  | 6.813468000000  | 13.975106000000 | O | 6.355328000000  | 13.099494000000 | 21.350903000000 |
| C | 6.031945000000  | 6.322604000000  | 13.843902000000 | H | 5.205547000000  | 15.622915000000 | 20.524470000000 |
| C | 6.097024000000  | 4.799106000000  | 14.028447000000 | H | 7.236430000000  | 15.129645000000 | 18.956219000000 |
| C | 7.469268000000  | 4.312308000000  | 14.530523000000 | H | 8.246265000000  | 15.183901000000 | 20.378077000000 |
| C | 7.645383000000  | 4.307068000000  | 16.046860000000 | N | 6.218060000000  | 15.246159000000 | 23.031602000000 |
| O | 8.334352000000  | 3.390632000000  | 16.568177000000 | C | 6.139944000000  | 15.448381000000 | 24.475030000000 |
| O | 7.066955000000  | 5.284740000000  | 16.725210000000 | C | 7.446344000000  | 15.831752000000 | 25.182893000000 |
| H | 3.945464000000  | 6.175712000000  | 14.347525000000 | O | 7.408306000000  | 16.349162000000 | 26.320649000000 |
| H | 6.649442000000  | 6.811688000000  | 14.606048000000 | H | 6.079059000000  | 14.319579000000 | 22.606704000000 |
| H | 5.859854000000  | 4.302510000000  | 13.078271000000 | H | 5.434977000000  | 16.252751000000 | 26.707919000000 |
| H | 5.328588000000  | 4.484627000000  | 14.743372000000 | H | 5.762009000000  | 14.525681000000 | 24.926867000000 |
| H | 7.670037000000  | 3.292368000000  | 14.192415000000 | N | 8.592496000000  | 15.568795000000 | 24.495711000000 |
| H | 8.277399000000  | 4.942645000000  | 14.132338000000 | C | 9.929248000000  | 15.936421000000 | 24.963419000000 |
| C | 5.672019000000  | -1.750749000000 | 15.872171000000 | C | 10.400691000000 | 17.291940000000 | 24.393056000000 |
| C | 6.349593000000  | -0.409148000000 | 16.211504000000 | O | 11.593122000000 | 17.661616000000 | 24.564417000000 |
| C | 7.738117000000  | -0.284598000000 | 15.555753000000 | C | 10.948503000000 | 14.830968000000 | 24.621101000000 |
| C | 5.448945000000  | 0.777898000000  | 15.817311000000 | C | 10.720633000000 | 13.555066000000 | 25.449525000000 |
| H | 5.518674000000  | -1.842089000000 | 14.787673000000 | O | 10.938109000000 | 13.605055000000 | 26.689892000000 |
| H | 6.489378000000  | -0.369271000000 | 17.303828000000 | O | 10.305087000000 | 12.489068000000 | 24.795503000000 |
| H | 8.402471000000  | -1.098322000000 | 15.873481000000 | H | 8.513256000000  | 15.114308000000 | 23.595883000000 |
| H | 7.652568000000  | -0.335232000000 | 14.461047000000 | H | 9.876458000000  | 16.038019000000 | 26.053286000000 |
| H | 8.211449000000  | 0.669936000000  | 15.814371000000 | H | 10.907521000000 | 14.602197000000 | 23.549055000000 |
| H | 5.907761000000  | 1.726833000000  | 16.117013000000 | H | 11.940657000000 | 15.230617000000 | 24.848742000000 |
| H | 4.464649000000  | 0.692703000000  | 16.294612000000 | N | 9.485703000000  | 18.031662000000 | 23.713764000000 |
| H | 5.302623000000  | 0.797970000000  | 14.727211000000 | C | 9.811833000000  | 19.326745000000 | 23.116884000000 |
| C | -3.943841000000 | 4.990312000000  | 19.441037000000 | C | 9.478286000000  | 19.386891000000 | 21.615911000000 |
| C | -3.607487000000 | 3.498859000000  | 19.610206000000 | C | 10.257218000000 | 18.449632000000 | 20.701414000000 |
| C | -2.623172000000 | 3.201270000000  | 20.768305000000 | C | 11.466292000000 | 17.838301000000 | 21.076421000000 |
| C | -2.576677000000 | 1.688227000000  | 21.061958000000 | C | 9.762128000000  | 18.202771000000 | 19.406287000000 |
| C | -1.209746000000 | 3.741725000000  | 20.469590000000 | C | 12.155433000000 | 17.011982000000 | 20.177755000000 |
| H | -3.048004000000 | 5.596008000000  | 19.263489000000 | C | 10.455164000000 | 17.383357000000 | 18.508995000000 |
| H | -4.540248000000 | 2.942973000000  | 19.790536000000 | C | 11.661813000000 | 16.779447000000 | 18.888883000000 |
| H | -3.179804000000 | 3.099408000000  | 18.678827000000 | H | 8.536339000000  | 17.693604000000 | 23.583102000000 |
| H | -2.998977000000 | 3.707117000000  | 21.672803000000 | H | 10.871605000000 | 19.509564000000 | 23.309732000000 |
| H | -1.872819000000 | 1.459188000000  | 21.872893000000 | H | 8.405055000000  | 19.187216000000 | 21.495452000000 |
| H | -3.562316000000 | 1.305346000000  | 21.353740000000 | H | 9.637808000000  | 20.426641000000 | 21.286946000000 |
| H | -2.264553000000 | 1.135849000000  | 20.163562000000 | H | 11.868203000000 | 17.982368000000 | 22.074210000000 |
| H | -1.210779000000 | 4.825866000000  | 20.315399000000 | H | 8.825334000000  | 18.665243000000 | 19.101605000000 |
| H | -0.523116000000 | 3.519101000000  | 21.297380000000 | H | 13.084007000000 | 16.543734000000 | 20.491206000000 |
| H | -0.815225000000 | 3.272328000000  | 19.556873000000 | H | 10.055336000000 | 17.214082000000 | 17.512561000000 |
| C | 9.042432000000  | 11.443890000000 | 13.555160000000 | H | 12.199946000000 | 16.137602000000 | 18.196380000000 |
| C | 9.655381000000  | 12.736845000000 | 14.091659000000 | C | 2.595857000000  | -0.252091000000 | 19.890226000000 |
| O | 9.571097000000  | 13.793009000000 | 13.419234000000 | C | 1.731676000000  | -0.240799000000 | 18.644606000000 |
| C | 8.624439000000  | 10.359648000000 | 14.581452000000 | O | 2.193349000000  | -0.504328000000 | 17.496845000000 |
| C | 9.801644000000  | 9.561432000000  | 15.114818000000 | C | 3.932266000000  | 0.513658000000  | 19.722341000000 |
| O | 10.324785000000 | 9.906330000000  | 16.243608000000 | C | 4.831938000000  | 0.284085000000  | 20.960642000000 |
| O | 10.259294000000 | 8.586207000000  | 14.386065000000 | C | 3.683435000000  | 2.009849000000  | 19.456770000000 |
| H | 8.167001000000  | 11.752034000000 | 12.975962000000 | C | 6.276208000000  | 0.783626000000  | 20.786901000000 |
| H | 8.098033000000  | 10.816551000000 | 15.424154000000 | H | 2.039741000000  | 0.153442000000  | 20.746675000000 |
| H | 7.937792000000  | 9.668684000000  | 14.082015000000 | H | 4.439386000000  | 0.083978000000  | 18.847178000000 |
| N | 10.321344000000 | 12.675114000000 | 15.288618000000 | H | 4.853509000000  | -0.792828000000 | 21.186109000000 |
| C | 10.961134000000 | 13.851296000000 | 15.868150000000 | H | 4.372759000000  | 0.773471000000  | 21.833579000000 |
| C | 12.487348000000 | 13.775814000000 | 15.953526000000 | H | 6.873582000000  | 0.553769000000  | 21.677152000000 |
| O | 13.120385000000 | 14.580317000000 | 16.684947000000 | H | 6.754679000000  | 0.294567000000  | 19.928655000000 |
| H | 10.320029000000 | 11.811829000000 | 15.832239000000 | H | 6.329979000000  | 1.865141000000  | 20.622909000000 |

|   |                 |                 |                 |    |                 |                 |                 |
|---|-----------------|-----------------|-----------------|----|-----------------|-----------------|-----------------|
| H | 3.068980000000  | 2.156006000000  | 18.560610000000 | H  | 13.287795000000 | 3.755225000000  | 18.564369000000 |
| H | 4.621258000000  | 2.551397000000  | 19.302587000000 | H  | 10.582693000000 | 4.308649000000  | 16.498566000000 |
| H | 3.165248000000  | 2.475614000000  | 20.306279000000 | H  | 12.185899000000 | 4.746700000000  | 16.977483000000 |
| N | 0.408854000000  | 0.047339000000  | 18.816875000000 | Fe | 7.330398000000  | 6.157337000000  | 18.492928000000 |
| C | -0.562900000000 | -0.028938000000 | 17.717294000000 | O  | 7.833854000000  | 4.497932000000  | 19.862595000000 |
| C | -0.545818000000 | 1.205961000000  | 16.808332000000 | O  | 9.038411000000  | 6.637351000000  | 18.194095000000 |
| O | -1.476759000000 | 2.049960000000  | 16.822310000000 | C  | 7.857906000000  | 5.301414000000  | 20.881120000000 |
| H | 0.074102000000  | 0.340855000000  | 19.723396000000 | O  | 7.515028000000  | 6.541184000000  | 20.678703000000 |
| H | -0.346660000000 | -0.928205000000 | 17.131029000000 | C  | 8.301517000000  | 4.830922000000  | 22.240432000000 |
| N | 0.546605000000  | 1.311752000000  | 16.007666000000 | C  | 7.517086000000  | 5.476702000000  | 23.393682000000 |
| C | 0.739956000000  | 2.485555000000  | 15.155375000000 | H  | 8.224918000000  | 3.738944000000  | 22.262058000000 |
| C | 2.016259000000  | 2.341496000000  | 14.309027000000 | H  | 9.367226000000  | 5.080624000000  | 22.356846000000 |
| C | 2.498397000000  | 3.693536000000  | 13.813611000000 | H  | 6.454061000000  | 5.210135000000  | 23.353927000000 |
| O | 2.728397000000  | 4.635341000000  | 14.621819000000 | H  | 7.595770000000  | 6.566166000000  | 23.345785000000 |
| N | 2.689830000000  | 3.837561000000  | 12.479486000000 | N  | 11.934004000000 | 7.896575000000  | 17.151825000000 |
| H | 1.298427000000  | 0.635926000000  | 16.146555000000 | C  | 12.295619000000 | 7.773946000000  | 18.612040000000 |
| H | 0.811263000000  | 3.386005000000  | 15.773404000000 | C  | 13.356553000000 | 6.662737000000  | 18.816884000000 |
| H | 1.858323000000  | 1.641667000000  | 13.481277000000 | O  | 13.458545000000 | 5.746081000000  | 17.923117000000 |
| H | 2.823523000000  | 1.933169000000  | 14.931678000000 | C  | 11.050621000000 | 7.492947000000  | 19.495861000000 |
| H | 2.500633000000  | 3.094759000000  | 11.825967000000 | C  | 10.560793000000 | 8.580025000000  | 20.453031000000 |
| H | 3.015646000000  | 4.725030000000  | 12.122147000000 | C  | 10.438977000000 | 10.011884000000 | 19.874819000000 |
| C | -2.908582000000 | 6.222046000000  | 15.371903000000 | N  | 9.529311000000  | 10.882842000000 | 20.642673000000 |
| C | -1.720584000000 | 7.114373000000  | 15.703420000000 | C  | 9.770865000000  | 11.357479000000 | 21.896310000000 |
| O | -0.813933000000 | 7.328694000000  | 14.846813000000 | N  | 10.891510000000 | 11.095634000000 | 22.575420000000 |
| C | -2.494430000000 | 4.897463000000  | 14.709116000000 | N  | 8.855788000000  | 12.141984000000 | 22.499875000000 |
| H | -3.506832000000 | 6.031448000000  | 16.270470000000 | O  | 14.005951000000 | 6.752652000000  | 19.911579000000 |
| H | -2.014337000000 | 4.222162000000  | 15.425287000000 | H  | 12.751034000000 | 8.721943000000  | 18.911529000000 |
| H | -3.374337000000 | 4.382270000000  | 14.308842000000 | H  | 10.069916000000 | 7.170010000000  | 18.780920000000 |
| H | -1.802811000000 | 5.097399000000  | 13.884598000000 | H  | 11.173760000000 | 6.554822000000  | 20.046583000000 |
| N | -1.721347000000 | 7.671375000000  | 16.939306000000 | H  | 11.248549000000 | 8.577384000000  | 21.311992000000 |
| C | -0.664104000000 | 8.539173000000  | 17.461248000000 | H  | 9.586177000000  | 8.262585000000  | 20.842610000000 |
| C | -0.248475000000 | 7.989021000000  | 18.832325000000 | H  | 10.031287000000 | 9.979644000000  | 18.859451000000 |
| O | -1.059907000000 | 7.325723000000  | 19.541216000000 | H  | 11.431749000000 | 10.480483000000 | 19.807551000000 |
| C | -1.104041000000 | 10.038525000000 | 17.568519000000 | H  | 8.803318000000  | 11.379804000000 | 20.122925000000 |
| C | -1.358916000000 | 10.637933000000 | 16.173501000000 | H  | 11.613251000000 | 10.431732000000 | 22.317535000000 |
| C | -2.323237000000 | 10.233520000000 | 18.489868000000 | H  | 10.949488000000 | 11.545314000000 | 23.507342000000 |
| H | -2.390025000000 | 7.352197000000  | 17.629893000000 | H  | 7.921848000000  | 12.289375000000 | 22.122449000000 |
| H | 0.183174000000  | 8.491678000000  | 16.773414000000 | H  | 9.110971000000  | 12.457463000000 | 23.450344000000 |
| H | -0.243392000000 | 10.558918000000 | 18.012242000000 | H  | 12.749439000000 | 7.952364000000  | 16.524951000000 |
| H | -0.491447000000 | 10.530086000000 | 15.514541000000 | H  | 11.341372000000 | 8.748233000000  | 16.934305000000 |
| H | -1.595786000000 | 11.705342000000 | 16.260873000000 | H  | 11.391404000000 | 7.078503000000  | 16.799534000000 |
| H | -2.124299000000 | 10.149149000000 | 15.690586000000 | O  | 12.854679000000 | 8.190916000000  | 14.558716000000 |
| H | -2.165674000000 | 9.806606000000  | 19.485679000000 | H  | 11.854984000000 | 8.342757000000  | 14.425113000000 |
| H | -2.538601000000 | 11.301873000000 | 18.606222000000 | H  | 13.156164000000 | 7.406125000000  | 14.067915000000 |
| H | -3.216054000000 | 9.763929000000  | 18.057637000000 | O  | 10.105058000000 | 6.235243000000  | 15.794597000000 |
| N | 1.012112000000  | 8.287099000000  | 19.226357000000 | H  | 9.526365000000  | 6.389467000000  | 16.597174000000 |
| C | 1.516702000000  | 7.923772000000  | 20.551688000000 | H  | 10.003199000000 | 6.965315000000  | 15.131778000000 |
| C | 2.005091000000  | 6.454362000000  | 20.670979000000 | H  | 10.289936000000 | -0.504654000000 | 19.974291000000 |
| C | 3.179749000000  | 6.103900000000  | 19.809430000000 | H  | 2.815113000000  | -1.304434000000 | 20.120748000000 |
| N | 3.071605000000  | 5.551817000000  | 18.524040000000 | H  | -1.562761000000 | -0.106138000000 | 18.143579000000 |
| C | 4.533105000000  | 6.249631000000  | 20.030558000000 | H  | -0.138554000000 | 2.615392000000  | 14.513920000000 |
| C | 4.332778000000  | 5.388630000000  | 18.026670000000 | H  | 4.692793000000  | -1.829187000000 | 16.359843000000 |
| N | 5.239237000000  | 5.803350000000  | 18.915287000000 | H  | 6.288323000000  | -2.599955000000 | 16.193182000000 |
| H | 1.631285000000  | 8.765709000000  | 18.565876000000 | H  | -4.633270000000 | 5.139843000000  | 18.599996000000 |
| H | 0.713076000000  | 8.075423000000  | 21.279435000000 | H  | -4.431208000000 | 5.387586000000  | 20.341106000000 |
| H | 1.156457000000  | 5.794008000000  | 20.463004000000 | H  | 2.338643000000  | 8.604407000000  | 20.791614000000 |
| H | 2.280807000000  | 6.288384000000  | 21.720062000000 | H  | -3.543714000000 | 6.793166000000  | 14.679844000000 |
| H | 5.051187000000  | 6.650386000000  | 20.884241000000 | H  | 6.431956000000  | 6.623148000000  | 12.869583000000 |
| H | 4.548870000000  | 5.000046000000  | 17.048541000000 | H  | 3.451246000000  | 11.429359000000 | 17.909221000000 |
| C | 10.453669000000 | 0.152208000000  | 19.111174000000 | H  | 6.337417000000  | 16.939586000000 | 20.178862000000 |
| C | 10.130230000000 | 1.608532000000  | 19.477684000000 | H  | 9.748625000000  | 11.006535000000 | 12.835300000000 |
| N | 10.291373000000 | 2.532281000000  | 18.349359000000 | H  | 15.124069000000 | 3.494341000000  | 20.819522000000 |
| C | 11.410014000000 | 3.216633000000  | 18.054781000000 | H  | 10.817502000000 | 3.961667000000  | 25.331878000000 |
| N | 12.553386000000 | 3.077728000000  | 18.760491000000 | H  | 14.964083000000 | 13.051488000000 | 14.270060000000 |
| N | 11.416838000000 | 4.078680000000  | 17.022908000000 | H  | 10.589835000000 | 14.038703000000 | 16.880782000000 |
| H | 11.498588000000 | 0.049887000000  | 18.797489000000 | H  | 9.244470000000  | 20.115710000000 | 23.629603000000 |
| H | 9.817622000000  | -0.192669000000 | 18.288751000000 | H  | 7.916378000000  | 5.144150000000  | 24.357452000000 |
| H | 9.090077000000  | 1.704636000000  | 19.801861000000 | C  | 1.844300000000  | 5.176733000000  | 17.819677000000 |
| H | 10.754721000000 | 1.932406000000  | 20.316958000000 | H  | 2.109636000000  | 4.899023000000  | 16.798788000000 |
| H | 9.452566000000  | 2.795783000000  | 17.823387000000 | H  | 1.354187000000  | 4.335154000000  | 18.319297000000 |
| H | 12.633360000000 | 2.495096000000  | 19.591753000000 | H  | 1.156537000000  | 6.020068000000  | 17.786089000000 |

**5I<sub>me</sub> – VioC MeHis Intermediate state**

|   |                 |                 |                 |   |                 |                 |                  |
|---|-----------------|-----------------|-----------------|---|-----------------|-----------------|------------------|
| C | 11.099784000000 | 4.647261000000  | 25.503961000000 | H | 7.126702000000  | 11.384871000000 | 18.587923000000  |
| C | 11.262877000000 | 6.041496000000  | 24.920300000000 | N | 3.384698000000  | 9.710411000000  | 14.725938000000  |
| O | 11.155528000000 | 6.266790000000  | 23.688799000000 | C | 2.996637000000  | 8.432236000000  | 14.119964000000  |
| C | 12.400171000000 | 3.804108000000  | 25.608641000000 | C | 4.301565000000  | 7.844525000000  | 13.560319000000  |
| O | 13.012376000000 | 3.599234000000  | 24.308421000000 | O | 5.118191000000  | 8.592582000000  | 12.956929000000  |
| C | 12.109334000000 | 2.428513000000  | 26.208404000000 | C | 1.887806000000  | 8.639615000000  | 13.048500000000  |
| H | 10.648232000000 | 4.707177000000  | 26.503236000000 | O | 0.713134000000  | 9.207675000000  | 13.664808000000  |
| H | 13.119727000000 | 4.339248000000  | 26.245095000000 | C | 1.546862000000  | 7.348334000000  | 12.293848000000  |
| H | 13.725623000000 | 4.291333000000  | 24.155424000000 | H | 4.007489000000  | 10.274094000000 | 14.157891000000  |
| H | 13.036535000000 | 1.852736000000  | 26.279738000000 | H | 2.592224000000  | 7.800669000000  | 14.915419000000  |
| H | 11.666702000000 | 2.512016000000  | 27.207846000000 | H | 2.244380000000  | 9.398113000000  | 12.343524000000  |
| H | 11.414800000000 | 1.877976000000  | 25.563686000000 | H | 0.181605000000  | 8.514420000000  | 14.136282000000  |
| N | 11.535394000000 | 7.065093000000  | 25.794557000000 | H | 0.725746000000  | 7.546433000000  | 11.598736000000  |
| C | 11.507455000000 | 8.470930000000  | 25.346063000000 | H | 2.406099000000  | 6.982488000000  | 11.718542000000  |
| C | 12.717830000000 | 8.812733000000  | 24.459133000000 | H | 1.219073000000  | 6.571452000000  | 12.994889000000  |
| O | 12.654506000000 | 9.738990000000  | 23.608464000000 | N | 4.547304000000  | 6.536401000000  | 13.815622000000  |
| C | 11.375532000000 | 9.442786000000  | 26.543486000000 | C | 5.884586000000  | 5.955814000000  | 13.597011000000  |
| C | 10.195781000000 | 9.152980000000  | 27.511323000000 | C | 5.902834000000  | 4.450821000000  | 13.909751000000  |
| C | 10.140394000000 | 10.244814000000 | 28.601991000000 | C | 7.296758000000  | 3.942265000000  | 14.308314000000  |
| C | 8.839955000000  | 9.051465000000  | 26.784213000000 | C | 7.713363000000  | 4.208382000000  | 15.759855000000  |
| H | 11.494103000000 | 6.892083000000  | 26.789214000000 | O | 8.715225000000  | 3.599135000000  | 16.212890000000  |
| H | 10.641627000000 | 8.594874000000  | 24.687433000000 | O | 6.977625000000  | 5.069806000000  | 16.444318000000  |
| H | 12.317608000000 | 9.449051000000  | 27.111676000000 | H | 3.855422000000  | 5.973445000000  | 14.308827000000  |
| H | 11.241620000000 | 10.447240000000 | 26.126913000000 | H | 6.594987000000  | 6.473753000000  | 14.250001000000  |
| H | 10.394576000000 | 8.190563000000  | 28.020998000000 | H | 5.542377000000  | 3.887045000000  | 13.038876000000  |
| H | 8.816431000000  | 8.217705000000  | 26.069921000000 | H | 5.211654000000  | 4.242099000000  | 14.732435000000  |
| H | 8.628245000000  | 9.986455000000  | 26.248826000000 | H | 7.373288000000  | 2.860345000000  | 14.154671000000  |
| H | 8.036151000000  | 8.883286000000  | 27.511852000000 | H | 8.072405000000  | 4.388242000000  | 13.668117000000  |
| H | 11.118407000000 | 10.383396000000 | 29.082014000000 | C | 6.151624000000  | -2.026403000000 | 15.618056000000  |
| H | 9.813951000000  | 11.203195000000 | 28.179940000000 | C | 6.512448000000  | -0.592970000000 | 16.053959000000  |
| H | 9.419953000000  | 9.966749000000  | 29.381085000000 | C | 7.785135000000  | -0.095370000000 | -15.341829000000 |
| N | 13.841412000000 | 8.074941000000  | 24.643911000000 | C | 5.329146000000  | 0.367493000000  | 15.818997000000  |
| C | 14.886080000000 | 7.954549000000  | 23.612071000000 | H | 5.944972000000  | -2.061425000000 | 14.539409000000  |
| C | 14.822496000000 | 6.485889000000  | 23.184672000000 | H | 6.717589000000  | -0.610954000000 | 17.136448000000  |
| O | 14.702974000000 | 5.592211000000  | 24.098903000000 | H | 8.629533000000  | -0.772184000000 | 15.523032000000  |
| C | 16.291932000000 | 8.419879000000  | 24.087817000000 | H | 7.625690000000  | -0.051089000000 | 14.254997000000  |
| C | 16.294653000000 | 9.945998000000  | 24.297045000000 | H | 8.076153000000  | 0.905204000000  | 15.683318000000  |
| C | 16.780574000000 | 7.684393000000  | 25.350196000000 | H | 5.575627000000  | 1.381042000000  | 16.159335000000  |
| H | 13.786118000000 | 7.283069000000  | 25.273783000000 | H | 4.432946000000  | 0.030555000000  | 16.355063000000  |
| H | 14.579742000000 | 8.588371000000  | 22.775264000000 | H | 5.089508000000  | 0.419482000000  | 14.746812000000  |
| H | 16.978606000000 | 8.182342000000  | 23.260478000000 | C | -3.705312000000 | 5.271250000000  | 20.029966000000  |
| H | 16.767159000000 | 6.598335000000  | 25.221152000000 | C | -3.385951000000 | 3.786071000000  | 20.271987000000  |
| H | 17.803346000000 | 7.995694000000  | 25.593648000000 | C | -2.302929000000 | 3.540326000000  | 21.351491000000  |
| H | 16.145757000000 | 7.932867000000  | 26.209836000000 | C | -2.257318000000 | 2.049553000000  | 21.742687000000  |
| H | 17.292521000000 | 10.292302000000 | 24.590814000000 | C | -0.913775000000 | 4.023282000000  | 20.886061000000  |
| H | 15.589828000000 | 10.227258000000 | 25.087665000000 | H | -2.817336000000 | 5.838119000000  | 19.729357000000  |
| H | 16.001450000000 | 10.476275000000 | 23.384482000000 | H | -4.308992000000 | 3.269454000000  | 20.576480000000  |
| N | 14.816915000000 | 6.204860000000  | 21.881290000000 | H | -3.056551000000 | 3.313875000000  | 19.334666000000  |
| C | 14.481053000000 | 4.856107000000  | 21.410776000000 | H | -2.581686000000 | 4.114284000000  | 22.250354000000  |
| C | 12.947495000000 | 4.647717000000  | 21.429524000000 | H | -1.491250000000 | 1.859387000000  | 22.505814000000  |
| O | 12.608581000000 | 3.234635000000  | 21.615739000000 | H | -3.220851000000 | 1.708731000000  | 22.140995000000  |
| H | 14.800319000000 | 6.949366000000  | 21.147337000000 | H | -2.030594000000 | 1.430782000000  | 20.861871000000  |
| H | 14.958849000000 | 4.115355000000  | 22.058047000000 | H | -0.905784000000 | 5.095599000000  | 20.664520000000  |
| H | 12.488172000000 | 5.233354000000  | 22.227919000000 | H | -0.155458000000 | 3.831726000000  | 21.657412000000  |
| H | 12.517387000000 | 4.961390000000  | 20.477567000000 | H | -0.620318000000 | 3.489691000000  | 19.970809000000  |
| H | 12.606001000000 | 3.061831000000  | 22.594383000000 | C | 8.275310000000  | 10.306773000000 | 13.157119000000  |
| C | 3.736458000000  | 11.361875000000 | 16.496338000000 | C | 8.137888000000  | 11.596239000000 | 13.967175000000  |
| C | 3.116085000000  | 10.064947000000 | 16.002871000000 | O | 7.373740000000  | 12.507797000000 | 13.555197000000  |
| O | 2.411912000000  | 9.337137000000  | 16.761317000000 | C | 8.472476000000  | 8.961960000000  | 13.907063000000  |
| C | 5.287256000000  | 11.400817000000 | 16.389134000000 | C | 9.847509000000  | 8.751759000000  | 14.514745000000  |
| C | 5.980760000000  | 10.265122000000 | 17.085928000000 | O | 10.061350000000 | 9.211495000000  | 15.711854000000  |
| N | 6.810074000000  | 10.462381000000 | 18.185809000000 | O | 10.744802000000 | 8.125006000000  | 13.827160000000  |
| C | 5.994055000000  | 8.901591000000  | 16.852665000000 | H | 7.354381000000  | 10.226557000000 | 12.574205000000  |
| C | 7.300454000000  | 9.264058000000  | 18.583475000000 | H | 7.719966000000  | 8.874399000000  | 14.695294000000  |
| N | 6.822498000000  | 8.290881000000  | 17.790556000000 | H | 8.303427000000  | 8.163546000000  | 13.180402000000  |
| H | 3.322061000000  | 12.202482000000 | 15.924135000000 | N | 8.910890000000  | 11.735086000000 | 15.087500000000  |
| H | 5.588805000000  | 11.444368000000 | 15.335112000000 | C | 8.960909000000  | 12.983658000000 | 15.846470000000  |
| H | 5.630039000000  | 12.344379000000 | 16.826656000000 | C | 10.349056000000 | 13.619284000000 | 15.920835000000  |
| H | 5.482070000000  | 8.327028000000  | 16.102194000000 | O | 10.551007000000 | 14.593782000000 | 16.693839000000  |
| H | 7.966212000000  | 9.114298000000  | 19.414872000000 | H | 9.360243000000  | 10.907711000000 | 15.487756000000  |
|   |                 |                 |                 | H | 8.275857000000  | 13.689000000000 | 15.366155000000  |



|   |                 |                 |                 |   |                 |                 |                 |
|---|-----------------|-----------------|-----------------|---|-----------------|-----------------|-----------------|
| N | 11.305669000000 | 13.069340000000 | 15.135336000000 | H | 4.919047000000  | 2.511624000000  | 19.154615000000 |
| C | 12.707062000000 | 13.468543000000 | 15.120707000000 | H | 3.573572000000  | 2.636369000000  | 20.296954000000 |
| C | 13.575989000000 | 12.212748000000 | 15.076612000000 | N | 0.515259000000  | 0.243651000000  | 19.315901000000 |
| O | 13.139846000000 | 11.435461000000 | 13.935885000000 | C | -0.562314000000 | 0.125393000000  | 18.323770000000 |
| H | 11.072086000000 | 12.297702000000 | 14.523352000000 | C | -0.594760000000 | 1.290382000000  | 17.327106000000 |
| H | 12.910042000000 | 14.067630000000 | 16.012415000000 | O | -1.498237000000 | 2.163183000000  | 17.356542000000 |
| H | 13.452255000000 | 11.648238000000 | 16.013395000000 | H | 0.279508000000  | 0.609054000000  | 20.227516000000 |
| H | 14.635652000000 | 12.494508000000 | 14.984428000000 | H | -0.432688000000 | -0.820844000000 | 17.787796000000 |
| H | 13.270433000000 | 10.459559000000 | 14.077010000000 | N | 0.427420000000  | 1.303178000000  | 16.432393000000 |
| C | 7.495235000000  | 16.287152000000 | 19.889852000000 | C | 0.584999000000  | 2.409851000000  | 15.488411000000 |
| C | 7.283473000000  | 16.630569000000 | 21.362188000000 | C | 1.860733000000  | 2.226998000000  | 14.647030000000 |
| O | 7.788250000000  | 17.670279000000 | 21.875624000000 | C | 2.311956000000  | 3.549199000000  | 14.052742000000 |
| C | 8.285872000000  | 14.995806000000 | 19.572216000000 | O | 2.597442000000  | 4.526815000000  | 14.797792000000 |
| C | 7.520089000000  | 13.684965000000 | 19.687712000000 | N | 2.405780000000  | 3.629302000000  | 12.702778000000 |
| O | 7.998920000000  | 15.780674000000 | 19.009949000000 | H | 1.165095000000  | 0.607850000000  | 16.550629000000 |
| O | 6.513080000000  | 13.560729000000 | 20.469813000000 | H | 0.638552000000  | 3.355421000000  | 16.037337000000 |
| H | 6.514818000000  | 16.240694000000 | 19.397503000000 | H | 1.712364000000  | 1.465406000000  | 13.873739000000 |
| H | 8.702041000000  | 15.054625000000 | 18.560735000000 | H | 2.677055000000  | 1.881694000000  | 15.294862000000 |
| H | 9.164860000000  | 14.923332000000 | 20.229672000000 | H | 2.172126000000  | 2.856316000000  | 12.100746000000 |
| N | 6.496990000000  | 15.780674000000 | 22.078032000000 | H | 2.701849000000  | 4.499054000000  | 12.281276000000 |
| C | 6.005997000000  | 16.118246000000 | 23.410900000000 | C | -2.904611000000 | 6.186972000000  | 15.615159000000 |
| C | 7.051671000000  | 16.185567000000 | 24.531059000000 | C | -1.693119000000 | 7.083277000000  | 15.832935000000 |
| O | 6.803498000000  | 16.828342000000 | 25.574687000000 | O | -0.851220000000 | 7.265644000000  | 14.905758000000 |
| H | 6.219937000000  | 14.910874000000 | 21.606085000000 | C | -2.535982000000 | 4.821263000000  | 15.011361000000 |
| H | 5.525499000000  | 17.101824000000 | 23.402297000000 | H | -3.459130000000 | 6.055224000000  | 16.551573000000 |
| H | 5.250970000000  | 15.375948000000 | 23.689805000000 | H | -2.044183000000 | 4.178436000000  | 15.749055000000 |
| N | 8.211725000000  | 15.509090000000 | 24.304156000000 | H | -3.437157000000 | 4.301217000000  | 14.668645000000 |
| C | 9.348247000000  | 15.511408000000 | 25.226215000000 | H | -1.869591000000 | 4.964967000000  | 14.154857000000 |
| C | 10.379049000000 | 16.609845000000 | 24.890357000000 | N | -1.604198000000 | 7.678588000000  | 17.047273000000 |
| O | 11.484661000000 | 16.636456000000 | 25.496003000000 | C | -0.520644000000 | 8.572474000000  | 17.456077000000 |
| C | 10.037703000000 | 14.135061000000 | 25.235952000000 | C | -0.017041000000 | 8.102833000000  | 18.827040000000 |
| C | 9.169755000000  | 13.040260000000 | 25.885376000000 | O | -0.771934000000 | 7.460030000000  | 19.614479000000 |
| O | 8.762719000000  | 13.217162000000 | 27.063807000000 | C | -0.960332000000 | 10.075790000000 | 17.510564000000 |
| O | 8.942943000000  | 11.963165000000 | 25.157038000000 | C | -1.307598000000 | 10.600008000000 | 16.105370000000 |
| H | 8.301116000000  | 14.991378000000 | 23.439703000000 | C | -2.117363000000 | 10.318094000000 | 18.498503000000 |
| H | 8.956058000000  | 15.710554000000 | 26.229543000000 | H | -2.220865000000 | 7.384295000000  | 17.794899000000 |
| H | 10.321386000000 | 13.849527000000 | 24.215910000000 | H | 0.283886000000  | 8.489478000000  | 16.722275000000 |
| H | 10.958564000000 | 14.245029000000 | 25.818163000000 | H | -0.075375000000 | 10.620360000000 | 17.868345000000 |
| N | 10.043972000000 | 17.501495000000 | 23.921294000000 | H | -0.479320000000 | 10.465907000000 | 15.402463000000 |
| C | 10.964330000000 | 18.542716000000 | 23.469238000000 | H | -1.550443000000 | 11.668647000000 | 16.152770000000 |
| C | 11.233182000000 | 18.468342000000 | 21.953901000000 | H | -2.185150000000 | 10.079945000000 | 15.701540000000 |
| C | 11.843838000000 | 17.171410000000 | 21.440301000000 | H | -1.891198000000 | 9.947727000000  | 19.503816000000 |
| C | 12.663082000000 | 16.348422000000 | 22.233777000000 | H | -2.331342000000 | 11.390657000000 | 18.570260000000 |
| C | 11.595752000000 | 16.779220000000 | 20.111460000000 | H | -3.033921000000 | 9.822523000000  | 18.153908000000 |
| C | 13.220200000000 | 15.177041000000 | 21.704124000000 | N | 1.253549000000  | 8.451947000000  | 19.133296000000 |
| C | 12.145363000000 | 15.607690000000 | 19.577121000000 | C | 1.837592000000  | 8.211141000000  | 20.453699000000 |
| C | 12.967227000000 | 14.804457000000 | 20.378754000000 | C | 2.364973000000  | 6.767323000000  | 20.675613000000 |
| H | 9.145246000000  | 17.445721000000 | 23.449136000000 | C | 3.448324000000  | 6.341519000000  | 19.732542000000 |
| H | 11.880013000000 | 18.432200000000 | 24.055034000000 | N | 3.214070000000  | 5.611598000000  | 18.556326000000 |
| H | 10.284971000000 | 18.640623000000 | 21.428751000000 | C | 4.808193000000  | 6.567827000000  | 19.756946000000 |
| H | 11.891657000000 | 19.313095000000 | 21.693258000000 | C | 4.411829000000  | 5.424936000000  | 17.928089000000 |
| H | 12.840190000000 | 16.592279000000 | 23.276257000000 | N | 5.395714000000  | 5.993071000000  | 18.631361000000 |
| H | 10.953271000000 | 17.396769000000 | 19.488479000000 | H | 1.823125000000  | 8.892037000000  | 18.404099000000 |
| H | 13.842336000000 | 14.550065000000 | 22.336557000000 | H | 1.075730000000  | 8.415458000000  | 21.213073000000 |
| H | 11.905173000000 | 15.318258000000 | 18.557826000000 | H | 1.514608000000  | 6.079237000000  | 20.627581000000 |
| H | 13.397738000000 | 13.891280000000 | 19.976936000000 | H | 2.750299000000  | 6.717756000000  | 21.701850000000 |
| C | 2.785275000000  | -0.070488000000 | 20.196150000000 | H | 5.404106000000  | 7.101397000000  | 20.476825000000 |
| C | 1.805070000000  | -0.106481000000 | 19.039285000000 | H | 4.533225000000  | 4.906528000000  | 16.994906000000 |
| O | 2.144922000000  | -0.465256000000 | 17.875305000000 | C | 10.401006000000 | 0.518368000000  | 18.651881000000 |
| C | 4.145357000000  | 0.576422000000  | 19.836127000000 | C | 10.170767000000 | 1.977337000000  | 19.069997000000 |
| C | 5.141440000000  | 0.389924000000  | 21.005429000000 | N | 10.720742000000 | 2.946457000000  | 18.108500000000 |
| C | 3.969454000000  | 2.056911000000  | 19.451581000000 | C | 12.008005000000 | 3.312525000000  | 18.046936000000 |
| C | 6.583285000000  | 0.813719000000  | 20.678764000000 | N | 12.910150000000 | 2.824208000000  | 18.631697000000 |
| H | 2.342121000000  | 0.447684000000  | 21.057850000000 | N | 12.449188000000 | 4.158342000000  | 17.098369000000 |
| H | 4.535553000000  | 0.035466000000  | 18.962717000000 | H | 11.470566000000 | 0.294130000000  | 18.582137000000 |
| H | 5.139741000000  | -0.669677000000 | 21.302428000000 | H | 9.943540000000  | 0.320670000000  | 17.676742000000 |
| H | 4.780235000000  | 0.956176000000  | 21.877900000000 | H | 9.105017000000  | 2.206971000000  | 19.132604000000 |
| H | 7.250467000000  | 0.596444000000  | 21.520866000000 | H | 10.591015000000 | 2.169283000000  | 20.063954000000 |
| H | 6.961948000000  | 0.269239000000  | 19.804218000000 | H | 10.040712000000 | 3.380661000000  | 17.474929000000 |
| H | 6.661934000000  | 1.884793000000  | 20.464199000000 | H | 12.666399000000 | 2.622580000000  | 19.917670000000 |
| H | 3.277592000000  | 2.164375000000  | 18.608112000000 | H | 13.874748000000 | 3.072173000000  | 18.780532000000 |

H 11.807585000000 4.579038000000 16.408352000000  
H 13.201098000000 4.797121000000 17.366479000000  
Fe 7.444940000000 6.255773000000 17.978673000000  
O 8.156410000000 4.731683000000 19.340486000000  
O 9.079869000000 6.827682000000 17.204843000000  
C 8.227325000000 5.570205000000 20.335016000000  
O 7.886552000000 6.799056000000 20.089965000000  
C 8.670870000000 5.136890000000 21.701433000000  
C 7.776459000000 5.703305000000 22.819024000000  
H 8.696822000000 4.043068000000 21.720811000000  
H 9.696927000000 5.490826000000 21.868964000000  
H 6.743261000000 5.347465000000 22.725300000000  
H 7.768120000000 6.795979000000 22.782466000000  
N 12.330385000000 8.202699000000 16.874376000000  
C 12.726135000000 8.581363000000 18.273574000000  
C 13.742185000000 7.526180000000 18.839607000000  
O 13.778556000000 6.375706000000 18.284370000000  
C 11.513308000000 8.682330000000 19.155092000000  
C 11.582316000000 9.440466000000 20.444736000000  
C 11.227988000000 10.967946000000 20.350832000000  
N 9.849693000000 11.312770000000 20.732426000000  
C 9.485594000000 11.463644000000 22.031896000000  
N 10.300183000000 11.149235000000 23.040687000000  
N 8.271832000000 11.968694000000 22.361276000000  
O 14.402771000000 7.934622000000 19.858647000000  
H 13.258096000000 9.539058000000 18.228748000000  
H 9.185907000000 7.781123000000 16.992515000000  
H 10.668216000000 8.036614000000 18.925616000000  
H 12.601576000000 9.362835000000 20.843264000000  
H 10.920592000000 8.982014000000 21.187325000000  
H 11.366919000000 11.327204000000 19.327686000000  
H 11.919014000000 11.533672000000 20.988384000000  
H 9.233530000000 11.714619000000 20.018214000000  
H 11.203376000000 10.689014000000 22.958958000000  
H 9.944355000000 11.406720000000 23.993146000000  
H 7.582311000000 12.275018000000 21.682529000000  
H 8.087209000000 12.054306000000 23.364908000000  
H 13.054115000000 8.392674000000 16.156674000000  
H 11.473277000000 8.716068000000 16.537258000000  
H 12.102848000000 7.191432000000 16.791929000000  
O 13.230788000000 8.735581000000 14.312194000000  
H 12.266094000000 8.480041000000 14.073436000000  
H 13.869085000000 8.258084000000 13.753551000000  
O 11.012281000000 5.949185000000 15.724112000000  
H 10.192969000000 6.151337000000 16.292359000000  
H 10.949036000000 6.409654000000 14.859825000000  
H 9.955745000000 -0.162090000000 19.388142000000  
H 2.956285000000 -1.111918000000 20.505153000000  
H -1.517731000000 0.115244000000 18.847826000000  
H -0.298265000000 2.472997000000 14.842513000000  
H 5.259543000000 -2.388874000000 16.143317000000  
H 6.974484000000 -2.722402000000 15.822544000000  
H -4.466790000000 5.381943000000 19.247056000000  
H -4.098034000000 5.742164000000 20.940734000000  
H 2.657390000000 8.923546000000 20.583954000000  
H -3.567470000000 6.725170000000 14.923071000000  
H 6.197355000000 6.149547000000 12.564703000000  
H 3.429636000000 11.482512000000 17.537973000000  
H 8.038859000000 17.136159000000 19.468352000000  
H 9.100417000000 10.449176000000 12.444008000000  
H 14.873364000000 4.758659000000 20.395972000000  
H 10.405529000000 4.110822000000 24.849926000000  
H 12.919582000000 14.086276000000 14.238035000000  
H 8.632574000000 12.836098000000 16.882299000000  
H 10.544193000000 19.531199000000 23.699660000000  
H 8.157229000000 5.397466000000 23.798331000000  
C 1.931801000000 5.084232000000 18.083673000000  
H 2.026615000000 4.859753000000 17.020434000000  
H 1.663146000000 4.175473000000 18.632010000000  
H 1.145154000000 5.823773000000 18.222934000000

#### <sup>5</sup>TS<sub>me,reb</sub> – VioC MeHis Transition state for radical rebound

C 11.514792000000 4.624485000000 25.492739000000  
C 11.684571000000 5.976661000000 24.818189000000  
O 11.518730000000 6.134115000000 23.581099000000  
C 12.812526000000 3.789999000000 25.667922000000  
O 13.413210000000 3.463388000000 24.385949000000  
C 12.521085000000 2.475797000000 26.392292000000  
H 11.056585000000 4.757603000000 26.482144000000  
H 13.539069000000 4.377627000000 26.247656000000  
H 14.139595000000 4.122020000000 24.170011000000  
H 13.446387000000 1.904246000000 26.508066000000  
H 12.087024000000 2.651880000000 27.383345000000  
H 11.818862000000 1.872435000000 25.805839000000  
N 12.032075000000 7.036467000000 25.614506000000  
C 12.042126000000 8.417465000000 25.091998000000  
C 13.155814000000 8.609243000000 24.049476000000  
O 12.999176000000 9.355149000000 23.047248000000  
C 12.155470000000 9.435692000000 26.252644000000  
C 11.065179000000 9.310685000000 27.350302000000  
C 11.302096000000 10.382939000000 28.434920000000  
C 9.642005000000 9.433787000000 26.769753000000  
H 12.042410000000 6.921241000000 26.618429000000  
H 11.109338000000 8.588097000000 24.546054000000  
H 13.150767000000 9.344974000000 26.712339000000  
H 12.087280000000 10.440044000000 25.819977000000  
H 11.163347000000 8.319766000000 27.834786000000  
H 9.402952000000 8.611352000000 26.082046000000  
H 9.540238000000 10.385422000000 26.232838000000  
H 8.900932000000 9.412120000000 27.578143000000  
H 12.326401000000 10.332282000000 28.829027000000  
H 11.126010000000 11.386702000000 28.026289000000  
H 10.611654000000 10.231648000000 29.274290000000  
N 14.319268000000 7.949617000000 24.282205000000  
C 15.309033000000 7.710878000000 23.219799000000  
C 15.234148000000 6.204974000000 22.960585000000  
O 15.151167000000 5.409185000000 23.962756000000  
C 16.735053000000 8.223187000000 23.572459000000  
C 16.750184000000 9.763128000000 23.596475000000  
C 17.278644000000 7.639780000000 24.890694000000  
H 14.332275000000 7.265684000000 25.029543000000  
H 14.953218000000 8.245096000000 22.333752000000  
H 17.383699000000 7.883454000000 22.750092000000  
H 17.252216000000 6.546156000000 24.895005000000  
H 18.313829000000 7.965364000000 25.046662000000  
H 16.688388000000 7.999288000000 25.742741000000  
H 17.760294000000 10.134449000000 23.805903000000  
H 16.080366000000 10.143799000000 24.375849000000  
H 16.422443000000 10.182184000000 22.638835000000  
N 15.178635000000 5.794785000000 21.690635000000  
C 14.792879000000 4.414741000000 21.377068000000  
C 13.257702000000 4.276934000000 21.474254000000  
O 12.868164000000 2.888399000000 21.721932000000  
H 15.068952000000 6.479660000000 20.913236000000  
H 15.273028000000 3.733459000000 22.084318000000  
H 12.861855000000 4.908905000000 22.270160000000  
H 12.798342000000 4.581256000000 20.534195000000  
H 12.909674000000 2.754898000000 22.704183000000  
C 3.744821000000 11.406099000000 16.479934000000  
C 3.133276000000 10.097544000000 16.001718000000  
O 2.416637000000 9.379542000000 16.756511000000  
C 5.300493000000 11.422882000000 16.415491000000  
C 5.952292000000 10.334390000000 17.216255000000  
N 6.614977000000 10.588088000000 18.412344000000  
C 6.042451000000 8.966797000000 17.025340000000  
C 7.080290000000 9.414118000000 18.906494000000  
N 6.756829000000 8.407700000000 18.081337000000  
H 3.354711000000 12.233276000000 15.872057000000  
H 5.629048000000 11.369007000000 15.370118000000  
H 5.648736000000 12.393502000000 16.784741000000

|   |                 |                 |                 |   |                 |                 |                   |
|---|-----------------|-----------------|-----------------|---|-----------------|-----------------|-------------------|
| H | 5.660571000000  | 8.357322000000  | 16.225735000000 | H | 9.429478000000  | 11.128294000000 | 15.773682000000   |
| H | 7.623018000000  | 9.309561000000  | 19.828384000000 | H | 8.815961000000  | 14.043486000000 | 15.569235000000   |
| H | 6.900611000000  | 11.523370000000 | 18.795671000000 | N | 11.716476000000 | 12.920704000000 | 15.455750000000   |
| N | 3.431834000000  | 9.729888000000  | 14.735499000000 | C | 13.156455000000 | 13.140535000000 | 15.428350000000   |
| C | 3.102336000000  | 8.433731000000  | 14.134485000000 | C | 13.855750000000 | 11.785968000000 | 15.348159000000   |
| C | 4.453370000000  | 7.880974000000  | 13.649174000000 | O | 13.302657000000 | 11.092924000000 | 14.203023000000   |
| O | 5.278403000000  | 8.658002000000  | 13.093578000000 | H | 11.387549000000 | 12.164173000000 | 14.870423000000   |
| C | 2.043726000000  | 8.599976000000  | 13.007138000000 | H | 13.445224000000 | 13.691049000000 | 16.328042000000   |
| O | 0.830238000000  | 9.156138000000  | 13.554195000000 | H | 13.676713000000 | 11.223556000000 | 16.277267000000   |
| C | 1.766662000000  | 7.289677000000  | 12.260322000000 | H | 14.940974000000 | 11.931113000000 | 15.240141000000   |
| H | 4.066417000000  | 10.291174000000 | 14.178937000000 | H | 13.341221000000 | 10.105186000000 | 14.307741000000   |
| H | 2.678656000000  | 7.802034000000  | 14.919677000000 | C | 6.708302000000  | 16.180873000000 | 20.526524000000   |
| H | 2.420619000000  | 9.353208000000  | 12.306828000000 | C | 6.771849000000  | 16.416030000000 | 22.034742000000   |
| H | 0.288604000000  | 8.460989000000  | 14.011343000000 | O | 7.099754000000  | 17.539575000000 | 22.511921000000   |
| H | 0.975179000000  | 7.457357000000  | 11.524002000000 | C | 7.675540000000  | 15.134678000000 | 19.921279000000   |
| H | 2.659905000000  | 6.935500000000  | 11.731476000000 | C | 7.288618000000  | 13.669170000000 | 20.079971000000   |
| H | 1.425569000000  | 6.515085000000  | 12.957126000000 | O | 7.784863000000  | 12.834546000000 | 19.211774000000   |
| N | 4.730918000000  | 6.584385000000  | 13.924646000000 | O | 6.560018000000  | 13.282235000000 | 21.064756000000   |
| C | 6.107299000000  | 6.061433000000  | 13.819743000000 | H | 5.676867000000  | 15.912281000000 | 20.261502000000   |
| C | 6.160697000000  | 4.554389000000  | 14.113527000000 | H | 7.785292000000  | 15.326404000000 | 18.849291000000   |
| C | 7.539104000000  | 4.090436000000  | 14.626054000000 | H | 8.684914000000  | 15.263721000000 | 20.337084000000   |
| C | 7.753429000000  | 4.252036000000  | 16.132941000000 | N | 6.416884000000  | 15.368126000000 | 22.828060000000   |
| O | 8.397529000000  | 3.353322000000  | 16.744120000000 | C | 6.188295000000  | 15.523690000000 | 24.261445000000   |
| O | 7.251556000000  | 5.331312000000  | 16.690672000000 | C | 7.422160000000  | 15.809307000000 | 25.126522000000   |
| H | 4.025791000000  | 5.991125000000  | 14.360360000000 | O | 7.278735000000  | 16.284986000000 | 26.274495000000   |
| H | 6.733180000000  | 6.592045000000  | 14.544712000000 | H | 6.249927000000  | 14.473518000000 | 22.349951000000   |
| H | 5.899834000000  | 3.992270000000  | 13.206684000000 | H | 5.500804000000  | 16.354784000000 | 24.449548000000   |
| H | 5.403805000000  | 4.299845000000  | 14.864127000000 | H | 5.717617000000  | 14.606599000000 | 24.630089000000   |
| H | 7.704233000000  | 3.034954000000  | 14.394546000000 | N | 8.625037000000  | 15.505926000000 | 24.566023000000   |
| H | 8.344141000000  | 4.651147000000  | 14.128742000000 | C | 9.914056000000  | 15.771682000000 | 25.204153000000   |
| C | 5.629899000000  | -1.697573000000 | 16.130423000000 | C | 10.522994000000 | 17.122122000000 | 24.766750000000   |
| C | 6.338750000000  | -0.378118000000 | 16.492406000000 | O | 11.702880000000 | 17.412450000000 | 25.099795000000   |
| C | 7.729678000000  | -0.274778000000 | 15.837459000000 | C | 10.905560000000 | 14.624272000000 | 24.921667000000   |
| C | 5.468109000000  | 0.837257000000  | 16.117587000000 | C | 10.530198000000 | 13.330985000000 | 25.665069000000   |
| H | 5.483138000000  | -1.769111000000 | 15.043376000000 | O | 10.678089000000 | 13.303733000000 | 26.917136000000   |
| H | 6.479462000000  | -0.359215000000 | 17.585617000000 | O | 10.078409000000 | 12.332481000000 | 24.934140000000   |
| H | 8.378347000000  | -1.103657000000 | 16.148315000000 | H | 8.629977000000  | 15.094825000000 | 23.642142000000   |
| H | 7.641707000000  | -0.316878000000 | 14.742384000000 | H | 9.738855000000  | 15.827459000000 | 26.284475000000   |
| H | 8.219593000000  | 0.669888000000  | 16.101145000000 | H | 10.964704000000 | 14.440765000000 | 23.841681000000   |
| H | 5.950881000000  | 1.769969000000  | 16.429386000000 | H | 11.886611000000 | 14.959150000000 | 25.269246000000   |
| H | 4.481738000000  | 0.770605000000  | 16.593861000000 | N | 9.736534000000  | 17.946007000000 | 24.025500000000   |
| H | 5.321609000000  | 0.876616000000  | 15.027864000000 | C | 10.217743000000 | 19.230177000000 | 23.519070000000   |
| C | -3.946239000000 | 5.592278000000  | 20.076174000000 | C | 10.096109000000 | 19.341656000000 | 21.987409000000   |
| C | -3.796947000000 | 4.101405000000  | 19.726975000000 | C | 10.833938000000 | 18.284214000000 | 21.177881000000   |
| C | -2.626424000000 | 3.390224000000  | 20.449887000000 | C | 12.006269000000 | 17.655998000000 | 21.633610000000   |
| C | -2.735877000000 | 1.861616000000  | 20.274309000000 | C | 10.331695000000 | 17.919862000000 | 19.914002000000   |
| C | -1.254234000000 | 3.888788000000  | 19.951741000000 | C | 12.649249000000 | 16.690900000000 | 20.845837000000   |
| H | -3.051558000000 | 6.171580000000  | 19.823457000000 | C | 10.970012000000 | 16.955858000000 | 19.126487000000   |
| H | -4.732993000000 | 3.580644000000  | 19.979311000000 | C | 12.135259000000 | 16.335134000000 | 19.594504000000   |
| H | -3.660750000000 | 3.978638000000  | 18.641316000000 | H | 8.797315000000  | 17.665929000000 | 23.755607000000   |
| H | -2.709620000000 | 3.620586000000  | 21.524865000000 | H | 11.251579000000 | 19.334808000000 | 23.856405000000   |
| H | -1.927537000000 | 1.347422000000  | 20.815405000000 | H | 9.300978000000  | 19.300978000000 | 21.722383000000   |
| H | -3.688728000000 | 1.479348000000  | 20.661214000000 | H | 10.451102000000 | 20.345293000000 | 21.701253000000   |
| H | -2.666375000000 | 1.601881000000  | 19.209935000000 | H | 12.402877000000 | 17.882560000000 | 22.618077000000   |
| H | -1.146105000000 | 4.973276000000  | 20.056534000000 | H | 9.422043000000  | 18.395256000000 | 19.553057000000   |
| H | -0.440656000000 | 3.410735000000  | 20.515166000000 | H | 13.545714000000 | 16.207473000000 | 21.224333000000   |
| H | -1.128352000000 | 3.631230000000  | 18.891282000000 | H | 10.567997000000 | 16.654673000000 | 18.165507000000   |
| C | 8.512831000000  | 10.676240000000 | 13.348110000000 | H | 12.608903000000 | 15.576024000000 | 18.981912000000   |
| C | 8.537236000000  | 11.998211000000 | 14.115286000000 | C | 2.368800000000  | -0.557250000000 | 19.967912000000   |
| O | 8.063573000000  | 13.032775000000 | 13.583136000000 | C | 1.589731000000  | -0.550351000000 | 18.668463000000   |
| C | 8.439714000000  | 9.349563000000  | 14.148973000000 | O | 2.146787000000  | -0.757574000000 | 17.551683000000   |
| C | 9.747695000000  | 8.912060000000  | 14.779773000000 | C | 3.593069000000  | 0.395026000000  | 19.939297000000   |
| O | 10.038464000000 | 9.346977000000  | 15.971695000000 | C | 4.468710000000  | 0.167996000000  | 16.17946030000000 |
| O | 10.524202000000 | 8.118080000000  | 14.116406000000 | C | 3.146988000000  | 1.862426000000  | 19.794696000000   |
| H | 7.636728000000  | 10.727115000000 | 12.695807000000 | C | 5.808470000000  | 0.922435000000  | 21.173186000000   |
| H | 7.679670000000  | 9.432175000000  | 14.929829000000 | H | 1.717344000000  | -0.302219000000 | 20.814743000000   |
| H | 8.122843000000  | 8.569499000000  | 13.453830000000 | H | 4.186386000000  | 0.123383000000  | 19.055104000000   |
| N | 9.140056000000  | 12.008994000000 | 15.344907000000 | H | 4.668391000000  | -0.909621000000 | 21.290766000000   |
| C | 9.367157000000  | 13.250117000000 | 16.082930000000 | H | 3.896219000000  | 0.457624000000  | 22.089615000000   |
| C | 10.838143000000 | 13.669952000000 | 16.165889000000 | H | 6.412733000000  | 0.663394000000  | 22.050133000000   |
| O | 11.177212000000 | 14.657118000000 | 16.867169000000 | H | 6.389194000000  | 0.665816000000  | 20.278289000000   |

|   |                 |                 |                 |    |                 |                 |                 |
|---|-----------------|-----------------|-----------------|----|-----------------|-----------------|-----------------|
| H | 5.670620000000  | 2.008746000000  | 21.178063000000 | H  | 12.561498000000 | 2.336961000000  | 19.995287000000 |
| H | 2.523748000000  | 2.001700000000  | 18.903418000000 | H  | 13.525451000000 | 2.939184000000  | 18.707512000000 |
| H | 4.005970000000  | 2.533381000000  | 19.700085000000 | H  | 11.033235000000 | 4.218265000000  | 16.662909000000 |
| H | 2.564704000000  | 2.181878000000  | 20.675042000000 | H  | 12.570814000000 | 4.506573000000  | 17.357422000000 |
| N | 0.248776000000  | -0.313537000000 | 18.748022000000 | Fe | 7.502017000000  | 6.418777000000  | 18.383794000000 |
| C | -0.626225000000 | -0.359090000000 | 17.568101000000 | O  | 8.268978000000  | 4.965639000000  | 19.764321000000 |
| C | -0.574313000000 | 0.929920000000  | 16.737440000000 | O  | 9.240605000000  | 7.163023000000  | 17.807425000000 |
| O | -1.531033000000 | 1.745074000000  | 16.724560000000 | C  | 8.141239000000  | 5.744942000000  | 20.799871000000 |
| H | -0.163045000000 | -0.049486000000 | 19.631440000000 | O  | 7.689273000000  | 6.945085000000  | 20.601332000000 |
| H | -0.325387000000 | -1.214173000000 | 16.954120000000 | C  | 8.536343000000  | 5.264709000000  | 22.170573000000 |
| N | 0.581732000000  | 1.113244000000  | 16.046657000000 | C  | 7.772643000000  | 5.954847000000  | 23.309094000000 |
| C | 0.832598000000  | 2.344847000000  | 15.298013000000 | H  | 8.400725000000  | 4.177422000000  | 22.193819000000 |
| C | 2.051543000000  | 2.180481000000  | 14.376629000000 | H  | 9.614032000000  | 5.447106000000  | 22.298515000000 |
| C | 2.562018000000  | 3.525912000000  | 13.892248000000 | H  | 6.696598000000  | 5.752439000000  | 23.250013000000 |
| O | 2.785979000000  | 4.468808000000  | 14.700482000000 | H  | 7.911498000000  | 7.038397000000  | 23.263767000000 |
| N | 2.792354000000  | 3.658876000000  | 12.562635000000 | N  | 12.105228000000 | 7.850313000000  | 16.982248000000 |
| H | 1.337073000000  | 0.447579000000  | 16.215137000000 | C  | 12.412431000000 | 7.999742000000  | 18.450072000000 |
| H | 1.009203000000  | 3.179595000000  | 15.984658000000 | C  | 13.570923000000 | 7.010169000000  | 18.827708000000 |
| H | 1.816015000000  | 1.515456000000  | 13.538549000000 | O  | 13.557747000000 | 5.864012000000  | 18.257313000000 |
| H | 2.874520000000  | 1.717538000000  | 14.939004000000 | C  | 11.201413000000 | 7.696365000000  | 19.297720000000 |
| H | 2.605823000000  | 2.916496000000  | 11.907958000000 | C  | 10.646580000000 | 8.647781000000  | 20.311248000000 |
| H | 3.150129000000  | 4.536425000000  | 12.211376000000 | C  | 10.684264000000 | 10.154830000000 | 19.928526000000 |
| C | -2.816401000000 | 6.112438000000  | 15.386140000000 | N  | 9.688550000000  | 10.975131000000 | 20.637222000000 |
| C | -1.626036000000 | 7.026704000000  | 15.645879000000 | C  | 9.788192000000  | 11.359061000000 | 21.941381000000 |
| O | -0.744803000000 | 7.209621000000  | 14.756422000000 | N  | 10.820842000000 | 11.027356000000 | 22.718519000000 |
| C | -2.422641000000 | 4.783538000000  | 14.721055000000 | N  | 8.819438000000  | 12.117364000000 | 22.497362000000 |
| H | -3.368799000000 | 5.929544000000  | 16.315478000000 | O  | 14.380527000000 | 7.447933000000  | 19.711326000000 |
| H | -1.927853000000 | 4.109475000000  | 15.428178000000 | H  | 12.770332000000 | 9.018187000000  | 18.606705000000 |
| H | -3.312740000000 | 4.267197000000  | 14.346040000000 | H  | 9.214938000000  | 8.082345000000  | 17.460312000000 |
| H | -1.750675000000 | 4.977041000000  | 13.879088000000 | H  | 10.955892000000 | 6.648018000000  | 19.417003000000 |
| N | -1.604313000000 | 7.642602000000  | 16.853063000000 | H  | 11.197903000000 | 8.496591000000  | 21.258349000000 |
| C | -0.554937000000 | 8.559061000000  | 17.303256000000 | H  | 9.614903000000  | 8.346977000000  | 20.526249000000 |
| C | -0.117856000000 | 8.107730000000  | 18.703091000000 | H  | 10.454135000000 | 10.267131000000 | 18.864489000000 |
| O | -0.917601000000 | 7.493192000000  | 19.467783000000 | H  | 11.690570000000 | 10.565032000000 | 20.089014000000 |
| C | -1.017681000000 | 10.055828000000 | 17.316885000000 | H  | 9.023899000000  | 11.507811000000 | 20.069542000000 |
| C | -1.294057000000 | 10.559306000000 | 15.888432000000 | H  | 11.603113000000 | 10.427986000000 | 22.473621000000 |
| C | -2.231195000000 | 10.291943000000 | 18.235979000000 | H  | 10.789201000000 | 11.423818000000 | 23.677407000000 |
| H | -2.252111000000 | 7.351082000000  | 17.575171000000 | H  | 7.946832000000  | 12.331620000000 | 22.012060000000 |
| H | 0.286182000000  | 8.479827000000  | 16.611116000000 | H  | 8.977621000000  | 12.384611000000 | 23.475216000000 |
| H | -0.160988000000 | 10.616708000000 | 17.716524000000 | H  | 12.911236000000 | 8.022492000000  | 16.356298000000 |
| H | -0.427269000000 | 10.428343000000 | 15.232949000000 | H  | 11.348157000000 | 8.518402000000  | 16.668192000000 |
| H | -1.554025000000 | 11.624710000000 | 15.909601000000 | H  | 11.748725000000 | 6.898209000000  | 16.754771000000 |
| H | -2.140790000000 | 10.021984000000 | 15.443474000000 | O  | 13.102200000000 | 8.390195000000  | 14.474445000000 |
| H | -2.055360000000 | 9.937884000000  | 19.256877000000 | H  | 12.109605000000 | 8.264400000000  | 14.268509000000 |
| H | -2.465759000000 | 11.361754000000 | 18.280289000000 | H  | 13.657863000000 | 7.856662000000  | 13.879772000000 |
| H | -3.118970000000 | 9.776630000000  | 17.847626000000 | O  | 10.467066000000 | 5.851276000000  | 15.887186000000 |
| N | 1.145459000000  | 8.435741000000  | 19.059474000000 | H  | 9.867805000000  | 6.261511000000  | 16.595201000000 |
| C | 1.669678000000  | 8.165704000000  | 20.400000000000 | H  | 10.413854000000 | 6.373666000000  | 15.055089000000 |
| C | 2.180997000000  | 6.714097000000  | 20.608434000000 | H  | 9.882172000000  | -0.420136000000 | 20.167426000000 |
| C | 3.350926000000  | 6.326053000000  | 19.756390000000 | H  | 2.720979000000  | -1.585316000000 | 20.128344000000 |
| N | 3.234987000000  | 5.660477000000  | 18.526486000000 | H  | -1.654213000000 | -0.496845000000 | 17.901820000000 |
| C | 4.703538000000  | 6.530921000000  | 19.933657000000 | H  | -0.062874000000 | 2.594138000000  | 14.720594000000 |
| C | 4.493145000000  | 5.493208000000  | 18.017526000000 | H  | 4.644933000000  | -1.759481000000 | 16.608552000000 |
| N | 5.402813000000  | 6.011902000000  | 18.845235000000 | H  | 6.223791000000  | -2.566005000000 | 16.442465000000 |
| H | 1.750064000000  | 8.877832000000  | 18.361388000000 | H  | -4.799465000000 | 6.033628000000  | 19.545178000000 |
| H | 0.871775000000  | 8.354109000000  | 21.125391000000 | H  | -4.127004000000 | 5.723283000000  | 21.151196000000 |
| H | 1.340085000000  | 6.029343000000  | 20.453621000000 | H  | 2.484633000000  | 8.871395000000  | 20.585020000000 |
| H | 2.469738000000  | 6.621218000000  | 21.663107000000 | H  | -3.492040000000 | 6.667012000000  | 14.719058000000 |
| H | 5.228417000000  | 7.016756000000  | 20.738123000000 | H  | 6.501515000000  | 6.283808000000  | 12.822058000000 |
| H | 4.704667000000  | 5.024922000000  | 17.073768000000 | H  | 3.410912000000  | 11.558466000000 | 17.508926000000 |
| C | 10.163318000000 | 0.218582000000  | 19.321240000000 | H  | 6.926027000000  | 17.151848000000 | 20.075113000000 |
| C | 9.974648000000  | 1.698611000000  | 19.685165000000 | H  | 9.393569000000  | 10.659665000000 | 12.689804000000 |
| N | 10.313771000000 | 2.614252000000  | 18.587026000000 | H  | 15.147492000000 | 4.186406000000  | 20.369013000000 |
| C | 11.552220000000 | 3.022734000000  | 18.289174000000 | H  | 10.823206000000 | 4.045318000000  | 24.873822000000 |
| N | 12.624276000000 | 2.596588000000  | 19.006370000000 | H  | 13.436799000000 | 13.745872000000 | 14.555567000000 |
| N | 11.779456000000 | 3.866329000000  | 17.264045000000 | H  | 8.981055000000  | 13.174757000000 | 17.106763000000 |
| H | 11.207287000000 | 0.007950000000  | 19.066435000000 | H  | 9.639779000000  | 20.045472000000 | 23.975614000000 |
| H | 9.540392000000  | -0.050112000000 | 18.461625000000 | H  | 8.132474000000  | 5.600863000000  | 24.281485000000 |
| H | 8.929758000000  | 1.907573000000  | 19.929501000000 | C  | 2.003385000000  | 5.195213000000  | 17.886822000000 |
| H | 10.561405000000 | 1.957765000000  | 20.574491000000 | H  | 2.247016000000  | 4.850807000000  | 16.880992000000 |
| H | 9.533269000000  | 3.015362000000  | 18.048638000000 | H  | 1.554719000000  | 4.377959000000  | 18.460277000000 |

|                                                                    |                 |                 |                 |   |                 |                 |                 |
|--------------------------------------------------------------------|-----------------|-----------------|-----------------|---|-----------------|-----------------|-----------------|
| H                                                                  | 1.285249000000  | 6.011196000000  | 17.813557000000 | H | 7.675683000000  | 9.227153000000  | 19.819920000000 |
| <b><sup>5</sup>P<sub>me</sub> – VioC MeHis Product bound state</b> |                 |                 |                 |   |                 |                 |                 |
| C                                                                  | 11.631838000000 | 4.681801000000  | 25.719405000000 | H | 6.887455000000  | 11.451280000000 | 18.819463000000 |
| C                                                                  | 11.775286000000 | 6.012046000000  | 24.997853000000 | N | 3.479426000000  | 9.643190000000  | 14.758840000000 |
| O                                                                  | 11.568011000000 | 6.130131000000  | 23.763484000000 | C | 3.156657000000  | 8.365784000000  | 14.118710000000 |
| C                                                                  | 12.922140000000 | 3.821973000000  | 25.813252000000 | C | 4.513201000000  | 7.826294000000  | 13.630700000000 |
| O                                                                  | 13.419805000000 | 3.457598000000  | 24.497386000000 | O | 5.375242000000  | 8.632151000000  | 13.180751000000 |
| C                                                                  | 12.656111000000 | 2.527403000000  | 26.581563000000 | C | 2.099095000000  | 8.565939000000  | 12.994924000000 |
| H                                                                  | 11.255141000000 | 4.847000000000  | 26.737768000000 | O | 0.896760000000  | 9.134361000000  | 13.553677000000 |
| H                                                                  | 13.700197000000 | 4.403754000000  | 26.328601000000 | C | 1.800163000000  | 7.272165000000  | 12.227455000000 |
| H                                                                  | 14.137928000000 | 4.099071000000  | 24.221559000000 | H | 4.121444000000  | 10.216174000000 | 14.223656000000 |
| H                                                                  | 13.575677000000 | 1.938416000000  | 26.644090000000 | H | 2.731431000000  | 7.709521000000  | 14.882001000000 |
| H                                                                  | 12.295404000000 | 2.729890000000  | 27.596747000000 | H | 2.486646000000  | 9.324866000000  | 12.306242000000 |
| H                                                                  | 11.903024000000 | 1.929121000000  | 26.056191000000 | H | 0.345765000000  | 8.443136000000  | 14.005537000000 |
| N                                                                  | 12.150555000000 | 7.098982000000  | 25.744232000000 | H | 1.017928000000  | 7.467992000000  | 11.488197000000 |
| C                                                                  | 12.129443000000 | 8.460571000000  | 25.172889000000 | H | 2.689850000000  | 6.903746000000  | 11.702659000000 |
| C                                                                  | 13.196364000000 | 8.623967000000  | 24.078388000000 | H | 1.439508000000  | 6.494481000000  | 12.910583000000 |
| O                                                                  | 13.002509000000 | 9.357181000000  | 23.074599000000 | N | 4.763157000000  | 6.507466000000  | 13.799453000000 |
| C                                                                  | 12.281462000000 | 9.518921000000  | 26.291511000000 | C | 6.136686000000  | 5.981643000000  | 13.689817000000 |
| C                                                                  | 11.232909000000 | 9.425794000000  | 27.432594000000 | C | 6.187647000000  | 4.480572000000  | 14.014137000000 |
| C                                                                  | 11.506542000000 | 10.531624000000 | 28.473306000000 | C | 7.579707000000  | 4.016292000000  | 14.505359000000 |
| C                                                                  | 9.789410000000  | 9.526811000000  | 26.899661000000 | C | 7.819820000000  | 4.227230000000  | 16.003268000000 |
| H                                                                  | 12.194691000000 | 7.019883000000  | 26.750655000000 | O | 8.061985000000  | 3.213350000000  | 16.722480000000 |
| H                                                                  | 11.174503000000 | 8.605955000000  | 24.658542000000 | O | 7.806089000000  | 5.470966000000  | 16.446241000000 |
| H                                                                  | 13.293528000000 | 9.448151000000  | 26.716890000000 | H | 4.023479000000  | 5.870575000000  | 14.093283000000 |
| H                                                                  | 12.191973000000 | 10.507518000000 | 25.827445000000 | H | 6.769202000000  | 6.528521000000  | 14.397146000000 |
| H                                                                  | 11.351402000000 | 8.450558000000  | 27.943697000000 | H | 5.909525000000  | 3.900217000000  | 13.124221000000 |
| H                                                                  | 9.524947000000  | 8.675170000000  | 26.258705000000 | H | 5.439911000000  | 4.235475000000  | 14.778482000000 |
| H                                                                  | 9.665930000000  | 10.452703000000 | 26.324203000000 | H | 7.705938000000  | 2.948435000000  | 14.313198000000 |
| H                                                                  | 9.078256000000  | 9.542828000000  | 27.734576000000 | H | 8.369942000000  | 4.548919000000  | 13.959303000000 |
| H                                                                  | 12.544688000000 | 10.494790000000 | 28.831309000000 | C | 5.410359000000  | -1.796992000000 | 16.369929000000 |
| H                                                                  | 11.312266000000 | 11.518456000000 | 28.034179000000 | C | 6.130324000000  | -0.457033000000 | 16.614864000000 |
| H                                                                  | 10.847166000000 | 10.407006000000 | 29.341647000000 | C | 7.552037000000  | -0.451678000000 | 16.021015000000 |
| N                                                                  | 14.363781000000 | 7.954108000000  | 24.267654000000 | C | 5.304774000000  | 0.723687000000  | 16.066433000000 |
| C                                                                  | 15.291693000000 | 7.684101000000  | 23.158534000000 | H | 5.308533000000  | -1.987020000000 | 15.292001000000 |
| C                                                                  | 15.186949000000 | 6.175783000000  | 22.928292000000 | H | 6.221471000000  | -0.317043000000 | 17.704403000000 |
| O                                                                  | 15.170309000000 | 5.393766000000  | 23.943555000000 | H | 8.167465000000  | -1.250442000000 | 16.454671000000 |
| C                                                                  | 16.740297000000 | 8.185481000000  | 23.421014000000 | H | 7.515198000000  | -0.614684000000 | 14.934408000000 |
| C                                                                  | 16.773408000000 | 9.725468000000  | 23.418636000000 | H | 8.047167000000  | 0.508957000000  | 16.202838000000 |
| C                                                                  | 17.351974000000 | 7.617953000000  | 24.716201000000 | H | 5.797462000000  | 1.675906000000  | 16.291738000000 |
| H                                                                  | 14.402978000000 | 7.282152000000  | 25.024856000000 | H | 4.299210000000  | 0.727650000000  | 16.505871000000 |
| H                                                                  | 14.892316000000 | 8.209205000000  | 22.285673000000 | H | 5.202394000000  | 0.640016000000  | 14.974008000000 |
| H                                                                  | 17.337980000000 | 7.824635000000  | 22.569368000000 | C | -3.851694000000 | 5.172602000000  | 19.509693000000 |
| H                                                                  | 17.313570000000 | 6.525064000000  | 24.740279000000 | C | -3.577076000000 | 3.666819000000  | 19.661297000000 |
| H                                                                  | 18.397752000000 | 7.934250000000  | 24.807678000000 | C | -2.563032000000 | 3.320481000000  | 20.779598000000 |
| H                                                                  | 16.814556000000 | 7.998063000000  | 25.593936000000 | C | -2.588629000000 | 1.808172000000  | 21.079970000000 |
| H                                                                  | 17.798266000000 | 10.087900000000 | 23.561597000000 | C | -1.135251000000 | 3.781838000000  | 20.421084000000 |
| H                                                                  | 16.155399000000 | 10.125940000000 | 24.230193000000 | H | -2.934805000000 | 5.738855000000  | 19.311899000000 |
| H                                                                  | 16.393274000000 | 10.134015000000 | 22.475835000000 | H | -4.526519000000 | 3.152653000000  | 19.875532000000 |
| N                                                                  | 15.038067000000 | 5.747136000000  | 21.670518000000 | H | -3.204521000000 | 3.252399000000  | 18.712708000000 |
| C                                                                  | 14.617223000000 | 4.366636000000  | 21.409717000000 | H | -2.873353000000 | 3.849051000000  | 21.695742000000 |
| C                                                                  | 13.092966000000 | 4.267681000000  | 21.608597000000 | H | -1.863579000000 | 1.542686000000  | 21.860736000000 |
| O                                                                  | 12.677542000000 | 2.874132000000  | 21.767724000000 | H | -3.580013000000 | 1.481707000000  | 21.417146000000 |
| H                                                                  | 14.847309000000 | 6.407611000000  | 20.892178000000 | H | -2.349609000000 | 1.236114000000  | 20.171353000000 |
| H                                                                  | 15.129607000000 | 3.692875000000  | 22.101006000000 | H | -1.081065000000 | 4.864419000000  | 20.265789000000 |
| H                                                                  | 12.779185000000 | 4.841283000000  | 22.479169000000 | H | -0.428739000000 | 3.520787000000  | 21.220652000000 |
| H                                                                  | 12.569439000000 | 4.664521000000  | 20.739725000000 | H | -0.803330000000 | 3.291343000000  | 19.494987000000 |
| H                                                                  | 12.763591000000 | 2.665628000000  | 22.729459000000 | C | 8.693064000000  | 11.090677000000 | 13.306690000000 |
| C                                                                  | 3.774544000000  | 11.279481000000 | 16.542365000000 | C | 8.889629000000  | 12.389198000000 | 14.088427000000 |
| C                                                                  | 3.185591000000  | 9.970727000000  | 16.035997000000 | O | 8.649551000000  | 13.491001000000 | 13.538483000000 |
| O                                                                  | 2.482657000000  | 9.222311000000  | 16.775938000000 | C | 8.433846000000  | 9.791635000000  | 14.112630000000 |
| C                                                                  | 5.326465000000  | 11.347212000000 | 16.432845000000 | C | 9.689895000000  | 9.185135000000  | 14.705367000000 |
| C                                                                  | 6.030527000000  | 10.267098000000 | 17.198349000000 | O | 10.005492000000 | 9.477845000000  | 15.934040000000 |
| N                                                                  | 6.646738000000  | 10.509628000000 | 18.422128000000 | O | 10.415720000000 | 8.412567000000  | 13.962264000000 |
| C                                                                  | 6.199527000000  | 8.915918000000  | 16.958318000000 | H | 7.844394000000  | 11.270223000000 | 12.640151000000 |
| C                                                                  | 7.155852000000  | 9.341631000000  | 18.885978000000 | H | 7.720819000000  | 9.982930000000  | 14.917487000000 |
| N                                                                  | 6.911447000000  | 8.351060000000  | 18.013746000000 | H | 7.981278000000  | 9.060457000000  | 13.438438000000 |
| H                                                                  | 3.338980000000  | 12.113384000000 | 15.975590000000 | N | 9.369719000000  | 12.289365000000 | 15.367967000000 |
| H                                                                  | 5.625395000000  | 11.313402000000 | 15.377565000000 | C | 9.679333000000  | 13.469361000000 | 16.171942000000 |
| H                                                                  | 5.656767000000  | 12.322419000000 | 16.807105000000 | C | 11.176792000000 | 13.731757000000 | 16.359768000000 |
| H                                                                  | 5.879604000000  | 8.327192000000  | 16.117328000000 | O | 11.567163000000 | 14.645620000000 | 17.129666000000 |
|                                                                    |                 |                 |                 | H | 9.510755000000  | 11.372642000000 | 15.789506000000 |

|   |                 |                 |                 |   |                 |                 |                 |
|---|-----------------|-----------------|-----------------|---|-----------------|-----------------|-----------------|
| H | 9.246189000000  | 14.337048000000 | 15.665430000000 | H | 2.358945000000  | 2.276179000000  | 18.898591000000 |
| N | 12.017570000000 | 12.932025000000 | 15.659874000000 | H | 3.817353000000  | 2.863140000000  | 19.699916000000 |
| C | 13.471443000000 | 13.016832000000 | 15.710775000000 | H | 2.380077000000  | 2.479233000000  | 20.662026000000 |
| C | 14.046907000000 | 11.611683000000 | 15.554856000000 | N | 0.137553000000  | 0.018030000000  | 18.857626000000 |
| O | 13.483925000000 | 11.060289000000 | 14.339651000000 | C | -0.774525000000 | -0.037892000000 | 17.706842000000 |
| H | 11.651370000000 | 12.247663000000 | 15.011296000000 | C | -0.669581000000 | 1.189349000000  | 16.791574000000 |
| H | 13.765725000000 | 13.469962000000 | 16.661557000000 | O | -1.584123000000 | 2.048879000000  | 16.736454000000 |
| H | 13.775758000000 | 11.002486000000 | 16.430777000000 | H | -0.233894000000 | 0.340076000000  | 19.739986000000 |
| H | 15.144478000000 | 11.660935000000 | 15.499631000000 | H | -0.552909000000 | -0.947643000000 | 17.139065000000 |
| H | 13.440835000000 | 10.067851000000 | 14.358036000000 | N | 0.478903000000  | 1.260936000000  | 16.067566000000 |
| C | 6.549637000000  | 16.124924000000 | 20.542106000000 | C | 0.775168000000  | 2.415885000000  | 15.220758000000 |
| C | 6.619007000000  | 16.335642000000 | 22.054101000000 | C | 1.929509000000  | 2.099238000000  | 14.255187000000 |
| O | 6.910613000000  | 17.462652000000 | 22.546250000000 | C | 2.479128000000  | 3.366915000000  | 13.626743000000 |
| C | 7.543981000000  | 15.121990000000 | 19.907893000000 | O | 2.805758000000  | 4.356930000000  | 14.336388000000 |
| C | 7.205766000000  | 13.641526000000 | 20.044332000000 | N | 2.620045000000  | 3.380849000000  | 12.277615000000 |
| O | 7.715811000000  | 12.837613000000 | 19.156089000000 | H | 1.202623000000  | 0.570131000000  | 16.273132000000 |
| O | 6.500492000000  | 13.216601000000 | 21.030731000000 | H | 1.045046000000  | 3.282429000000  | 15.833507000000 |
| H | 5.524936000000  | 15.827787000000 | 20.281409000000 | H | 1.608518000000  | 1.379374000000  | 13.494408000000 |
| H | 7.631909000000  | 15.335730000000 | 18.837846000000 | H | 2.756561000000  | 1.638479000000  | 14.813258000000 |
| H | 8.553138000000  | 15.276652000000 | 20.315781000000 | H | 2.349085000000  | 2.600371000000  | 11.701374000000 |
| N | 6.308243000000  | 15.262569000000 | 22.831705000000 | H | 2.984704000000  | 4.209437000000  | 11.829138000000 |
| C | 6.080194000000  | 15.384166000000 | 24.268642000000 | C | -2.833637000000 | 6.197775000000  | 15.298544000000 |
| C | 7.305368000000  | 15.697218000000 | 25.136673000000 | C | -1.611591000000 | 7.049046000000  | 15.613327000000 |
| O | 7.146685000000  | 16.139054000000 | 26.296308000000 | O | -0.695149000000 | 7.209967000000  | 14.755011000000 |
| H | 6.167959000000  | 14.371423000000 | 22.338471000000 | C | -2.478575000000 | 4.863356000000  | 14.622997000000 |
| H | 5.364607000000  | 16.187174000000 | 24.473640000000 | H | -3.422410000000 | 6.024476000000  | 16.206867000000 |
| H | 5.642739000000  | 14.444761000000 | 24.621582000000 | H | -2.019299000000 | 4.165827000000  | 15.331162000000 |
| N | 8.517038000000  | 15.456969000000 | 24.565914000000 | H | -3.381805000000 | 4.385502000000  | 14.228369000000 |
| C | 9.796704000000  | 15.764051000000 | 25.204384000000 | H | -1.787718000000 | 5.041588000000  | 13.792875000000 |
| C | 10.331946000000 | 17.160385000000 | 24.816977000000 | N | -1.595593000000 | 7.637963000000  | 16.834283000000 |
| O | 11.487169000000 | 17.507785000000 | 25.179500000000 | C | -0.513837000000 | 8.491591000000  | 17.326400000000 |
| C | 10.843450000000 | 14.681660000000 | 24.865391000000 | C | -0.071021000000 | 7.950515000000  | 18.693423000000 |
| C | 10.554940000000 | 13.346578000000 | 25.573127000000 | O | -0.866364000000 | 7.288132000000  | 19.420195000000 |
| O | 10.776296000000 | 13.280882000000 | 26.813721000000 | C | -0.925372000000 | 9.999128000000  | 17.418137000000 |
| O | 10.094273000000 | 12.361307000000 | 24.832900000000 | C | -1.191611000000 | 10.578791000000 | 16.016689000000 |
| H | 8.535888000000  | 15.064607000000 | 23.634206000000 | C | -2.124700000000 | 10.229368000000 | 18.356865000000 |
| H | 9.632023000000  | 15.769563000000 | 26.287567000000 | H | -2.268622000000 | 7.350304000000  | 17.533990000000 |
| H | 10.890894000000 | 14.537823000000 | 23.778755000000 | H | 0.314473000000  | 8.422708000000  | 16.618073000000 |
| H | 11.811116000000 | 15.057268000000 | 25.207963000000 | H | -0.049101000000 | 10.511736000000 | 17.839307000000 |
| N | 9.512088000000  | 17.957462000000 | 24.082599000000 | H | -0.337620000000 | 10.436650000000 | 15.346152000000 |
| C | 9.932637000000  | 19.272321000000 | 23.602837000000 | H | -1.401470000000 | 11.653080000000 | 16.086345000000 |
| C | 9.864351000000  | 19.384574000000 | 22.067078000000 | H | -2.065935000000 | 10.100749000000 | 15.557604000000 |
| C | 10.689590000000 | 18.368709000000 | 21.289658000000 | H | -1.955278000000 | 9.814749000000  | 19.356078000000 |
| C | 11.897499000000 | 17.839048000000 | 21.776879000000 | H | -2.320204000000 | 11.302762000000 | 18.461459000000 |
| C | 10.237271000000 | 17.940103000000 | 20.027262000000 | H | -3.033143000000 | 9.768662000000  | 17.948284000000 |
| C | 12.624605000000 | 16.908934000000 | 21.021357000000 | N | 1.195936000000  | 8.256444000000  | 19.059547000000 |
| C | 10.960281000000 | 17.010104000000 | 19.272490000000 | C | 1.748567000000  | 7.872205000000  | 20.359787000000 |
| C | 12.160938000000 | 16.488494000000 | 19.770413000000 | C | 2.284853000000  | 6.416040000000  | 20.422716000000 |
| H | 8.592408000000  | 17.634036000000 | 23.794636000000 | C | 3.467498000000  | 6.119873000000  | 19.550244000000 |
| H | 10.944857000000 | 19.436706000000 | 23.979408000000 | N | 3.379200000000  | 5.681881000000  | 18.218970000000 |
| H | 8.814775000000  | 19.287497000000 | 21.761287000000 | C | 4.819818000000  | 6.199500000000  | 19.818170000000 |
| H | 10.175957000000 | 20.406764000000 | 21.796265000000 | C | 4.652270000000  | 5.525029000000  | 17.745792000000 |
| H | 12.256980000000 | 18.111908000000 | 22.763702000000 | N | 5.547653000000  | 5.832766000000  | 18.686134000000 |
| H | 9.301128000000  | 18.337748000000 | 19.640700000000 | H | 1.796409000000  | 8.733800000000  | 18.381961000000 |
| H | 13.547700000000 | 16.502313000000 | 21.425217000000 | H | 0.959762000000  | 7.977994000000  | 21.111570000000 |
| H | 10.600281000000 | 16.662042000000 | 18.310723000000 | H | 1.452601000000  | 5.737585000000  | 20.202098000000 |
| H | 12.698838000000 | 15.754353000000 | 19.181389000000 | H | 2.574997000000  | 6.224387000000  | 21.463405000000 |
| C | 2.274537000000  | -0.272481000000 | 20.033219000000 | H | 5.330393000000  | 6.510439000000  | 20.714021000000 |
| C | 1.460598000000  | -0.296967000000 | 18.757186000000 | H | 4.877470000000  | 5.216372000000  | 16.741108000000 |
| O | 1.975756000000  | -0.590461000000 | 17.639080000000 | C | 10.446150000000 | 0.089775000000  | 19.409313000000 |
| C | 3.470313000000  | 0.716345000000  | 19.964424000000 | C | 9.920740000000  | 1.513048000000  | 19.647301000000 |
| C | 4.367859000000  | 0.539812000000  | 21.212424000000 | N | 10.096988000000 | 2.392378000000  | 18.483676000000 |
| C | 2.979614000000  | 2.166572000000  | 19.795948000000 | C | 11.223121000000 | 3.073903000000  | 18.223686000000 |
| C | 5.684357000000  | 1.332296000000  | 21.158738000000 | N | 12.330494000000 | 2.953876000000  | 18.985489000000 |
| H | 1.640890000000  | -0.027281000000 | 20.896123000000 | N | 11.294288000000 | 3.897371000000  | 17.160025000000 |
| H | 4.060642000000  | 0.443003000000  | 19.078486000000 | H | 11.519964000000 | 0.098350000000  | 19.194325000000 |
| H | 4.599396000000  | -0.529583000000 | 21.326907000000 | H | 9.932087000000  | -0.374500000000 | 18.560886000000 |
| H | 3.798076000000  | 0.830775000000  | 22.108701000000 | H | 8.846863000000  | 1.492721000000  | 19.853282000000 |
| H | 6.309199000000  | 1.104737000000  | 22.029888000000 | H | 10.400411000000 | 1.959528000000  | 20.527301000000 |
| H | 6.257878000000  | 1.079324000000  | 20.258040000000 | H | 9.259296000000  | 2.686692000000  | 17.969245000000 |
| H | 5.515569000000  | 2.414011000000  | 21.149085000000 | H | 12.319737000000 | 2.556327000000  | 19.925177000000 |

|    |                 |                 |                 |
|----|-----------------|-----------------|-----------------|
| H  | 13.078451000000 | 3.609949000000  | 18.778796000000 |
| H  | 10.517330000000 | 4.029942000000  | 16.533885000000 |
| H  | 12.024616000000 | 4.610615000000  | 17.165385000000 |
| Fe | 7.641270000000  | 6.385429000000  | 18.373897000000 |
| O  | 8.681483000000  | 5.081091000000  | 19.675324000000 |
| O  | 9.669593000000  | 7.629212000000  | 18.138879000000 |
| C  | 8.369204000000  | 5.695491000000  | 20.788498000000 |
| O  | 7.721972000000  | 6.808937000000  | 20.726295000000 |
| C  | 8.795360000000  | 5.098412000000  | 22.107755000000 |
| C  | 7.890453000000  | 5.495905000000  | 23.281391000000 |
| H  | 8.841874000000  | 4.010468000000  | 21.984222000000 |
| H  | 9.822330000000  | 5.429081000000  | 22.320517000000 |
| H  | 6.867656000000  | 5.124690000000  | 23.142299000000 |
| H  | 7.840162000000  | 6.584339000000  | 23.372797000000 |
| N  | 11.927403000000 | 7.727507000000  | 16.777806000000 |
| C  | 12.177775000000 | 7.855191000000  | 18.248052000000 |
| C  | 13.240901000000 | 6.831575000000  | 18.713981000000 |
| O  | 13.231256000000 | 5.674799000000  | 18.149523000000 |
| C  | 10.834355000000 | 7.654732000000  | 19.045056000000 |
| C  | 10.654202000000 | 8.647242000000  | 20.211359000000 |
| C  | 10.643266000000 | 10.155217000000 | 19.821888000000 |
| N  | 9.656425000000  | 10.969086000000 | 20.554565000000 |
| C  | 9.773837000000  | 11.341502000000 | 21.860895000000 |
| N  | 10.806598000000 | 10.988219000000 | 22.628670000000 |
| N  | 8.822264000000  | 12.113218000000 | 22.420969000000 |
| O  | 13.999319000000 | 7.234767000000  | 19.656771000000 |
| H  | 12.579134000000 | 8.855903000000  | 18.420054000000 |
| H  | 9.540316000000  | 8.450848000000  | 17.609453000000 |
| H  | 10.815789000000 | 6.639378000000  | 19.444283000000 |
| H  | 11.454538000000 | 8.451567000000  | 20.935785000000 |
| H  | 9.709082000000  | 8.392843000000  | 20.700284000000 |
| H  | 10.380748000000 | 10.277864000000 | 18.765540000000 |
| H  | 11.645506000000 | 10.586732000000 | 19.948415000000 |
| H  | 8.994576000000  | 11.518214000000 | 20.000810000000 |
| H  | 11.576572000000 | 10.377725000000 | 22.378858000000 |
| H  | 10.791714000000 | 11.377144000000 | 23.588388000000 |
| H  | 7.939927000000  | 12.319832000000 | 21.957335000000 |
| H  | 9.001245000000  | 12.388031000000 | 23.401284000000 |
| H  | 12.778928000000 | 7.785078000000  | 16.198626000000 |
| H  | 11.296721000000 | 8.504679000000  | 16.443414000000 |
| H  | 11.415144000000 | 6.855399000000  | 16.502374000000 |
| O  | 13.024328000000 | 8.374255000000  | 14.320750000000 |
| H  | 12.029842000000 | 8.392237000000  | 14.108925000000 |
| H  | 13.518861000000 | 7.875254000000  | 13.647344000000 |
| O  | 10.283055000000 | 6.019470000000  | 15.401518000000 |
| H  | 9.388806000000  | 6.023462000000  | 15.831508000000 |
| H  | 10.300875000000 | 6.671455000000  | 14.659701000000 |
| H  | 10.281945000000 | -0.530798000000 | 20.298310000000 |
| H  | 2.661303000000  | -1.287903000000 | 20.190032000000 |
| H  | -1.798630000000 | -0.082561000000 | 18.076806000000 |
| H  | -0.130415000000 | 2.687242000000  | 14.669817000000 |
| H  | 4.405418000000  | -1.788063000000 | 16.808561000000 |
| H  | 5.971870000000  | -2.634832000000 | 16.802593000000 |
| H  | -4.557988000000 | 5.358024000000  | 18.689878000000 |
| H  | -4.295576000000 | 5.584113000000  | 20.425701000000 |
| H  | 2.555470000000  | 8.570921000000  | 20.598957000000 |
| H  | -3.461122000000 | 6.795072000000  | 14.621256000000 |
| H  | 6.531651000000  | 6.177158000000  | 12.685723000000 |
| H  | 3.469202000000  | 11.387373000000 | 17.585731000000 |
| H  | 6.730845000000  | 17.110942000000 | 20.107175000000 |
| H  | 9.569965000000  | 10.952725000000 | 12.658497000000 |
| H  | 14.907508000000 | 4.106717000000  | 20.388724000000 |
| H  | 10.882591000000 | 4.103685000000  | 25.170236000000 |
| H  | 13.848054000000 | 13.655323000000 | 14.900055000000 |
| H  | 9.220289000000  | 13.386511000000 | 17.164263000000 |
| H  | 9.288365000000  | 20.047166000000 | 24.040154000000 |
| C  | 8.276614000000  | 5.085467000000  | 24.221334000000 |
| C  | 2.168565000000  | 5.482508000000  | 17.420448000000 |
| H  | 2.429200000000  | 4.913165000000  | 16.527727000000 |
| H  | 1.419124000000  | 4.935763000000  | 17.997798000000 |
| H  | 1.754881000000  | 6.444291000000  | 17.114642000000 |
